# Supplementary material for: A Machine Learning Method for Estimating Atmospheric Trace Gas Concentration Baselines
Source: Copernicus journal article supplement (doi:10.5194/egusphere-2025-4137), 2025-09-04

# A Machine Learning Method for Estimating Atmospheric Trace Gas Concentration Baselines

Kirstin Gerrand<sup>1, 2</sup>, Elena Fillola<sup>1, 3</sup>, Alistair J. Manning<sup>4, 1</sup>, Jgor Arduini<sup>5</sup>, Paul B. Krummel<sup>6</sup>, Chris R. Lunder<sup>7</sup>, Jens Mühle<sup>8</sup>, Simon O'Doherty<sup>1</sup>, Sunyoung Park<sup>9</sup>, Ronald G. Prinn<sup>10</sup>, Stefan Reimann<sup>11</sup>, Dickon Young<sup>1</sup>, and Matthew Rigby<sup>1</sup>

<sup>1</sup>Atmospheric Chemistry Research Group, School of Chemistry, University of Bristol, Bristol, UK

<sup>2</sup>New Zealand Institute for Earth Science, Wellington, New Zealand

<sup>3</sup>School of Engineering Mathematics, University of Bristol, Bristol, UK

<sup>4</sup>Hadley Centre, Met Office, Exeter, UK

<sup>5</sup>Department of Pure and Applied Sciences, University of Urbino, Urbino, 61029, Italy

<sup>6</sup>CSIRO Environment, Aspendale, VIC, Australia

<sup>7</sup>NILU, Kjeller, Norway

<sup>8</sup>Scripps Institution of Oceanography, University of California San Diego, La Jolla, CA, USA

<sup>9</sup>Kyungpook Institute of Oceanography, Kyungpook National University, Daegu, Republic of Korea

<sup>10</sup>Center for Sustainability Science and Strategy, Massachusetts Institute of Technology, Cambridge, MA, USA

<sup>11</sup>Laboratory for Air Pollution/Environmental Technology, Empa, Dübendorf, Switzerland

## Supplementary Material

Here, we show additional figures and tables that elaborate on model choices and performance.

5 An example comparison of ECMWF and UK Met Office wind speed and direction at Mace Head, Ireland is shown in Figure S1, indicating that differences between the meteorology used to drive the NAME model (UK Met Office analysis) and that used in training our algorithm (ECMWF ERA5) are small and unlikely to contribute substantially to algorithm performance issues.

A summary of the meteorological parameters used as features in the machine learning model are provided in Table S1.

Metrics derived from the Random Forest (RF) model are provided in Table S2, based on hyperparameter sets in Tables S3a and S3b, and the the RF confusion matrix and heatmap is shown in Figs. S2 and S3, respectively.

10 Hyperparameter sets for the final MLP models are shown in Tables S4a and S4b. The feature importance for the MLP models are shown in Table S5. Plots indicating MLP model performance for a range of species and sites are shown in Section 4.3.

## 1 Intercomparison of ECMWF and Met Office UM Meteorological Fields

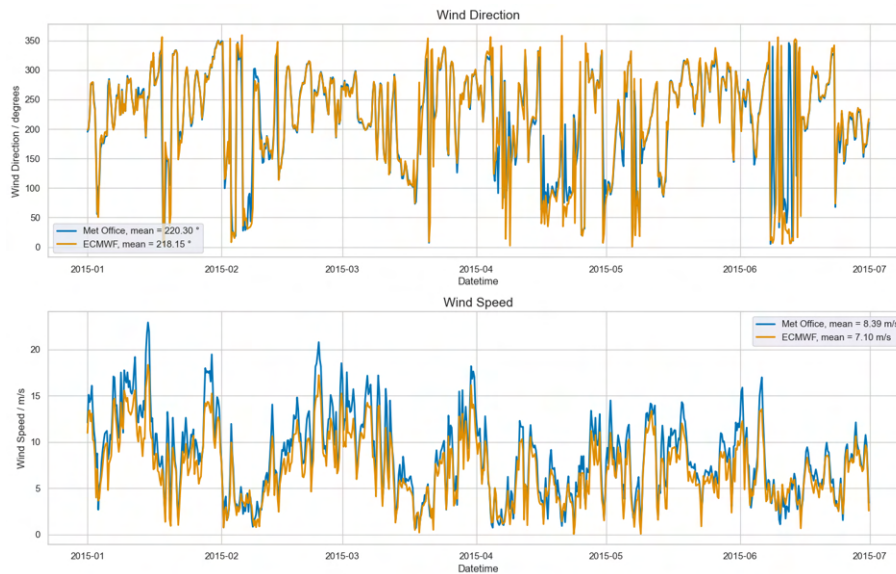

**Figure S1.** Subplots comparing ECMWF and Met Office UM 10m winds across a six-month sample period (Jan-June 2015) at Mace Head, Ireland. Top figure compares wind directions, and bottom, wind speeds. Legend contains average values for additional quantitative comparison.

## 2 Model Inputs

**Table S1.** Input variable categories used in the ML models. Each variable is extracted from 17 horizontally distributed points around the site; the data collection site itself and 16 from surrounding nearest grid points based on two 3x3 grids spanning  $\pm 5^\circ$  and  $\pm 10^\circ$  latitude and longitude.

| <i>Category</i>       | <i>Units</i>      |
|-----------------------|-------------------|
| Boundary layer height | m                 |
| Surface Pressure      | Pa                |
| 10m u-wind            | $\text{m s}^{-1}$ |
| 10m u-wind (T-6)      | $\text{m s}^{-1}$ |
| 500hPa u-wind         | $\text{m s}^{-1}$ |
| 500hPa u-wind (T-6)   | $\text{m s}^{-1}$ |
| 850hPa u-wind         | $\text{m s}^{-1}$ |
| 850hPa u-wind (T-6)   | $\text{m s}^{-1}$ |
| 10m v-wind            | $\text{m s}^{-1}$ |
| 10m v-wind (T-6)      | $\text{m s}^{-1}$ |
| 500hPa v-wind         | $\text{m s}^{-1}$ |
| 500hPa v-wind (T-6)   | $\text{m s}^{-1}$ |
| 850hPa v-wind         | $\text{m s}^{-1}$ |
| 850hPa v-wind (T-6)   | $\text{m s}^{-1}$ |
| Time of Day           |                   |
| Day of Year           |                   |

3 Random Forest Summary

15 3.1 Final Random Forest Model Outcomes

**Table S2.** A tabular summary of the final RF model outcomes, showing precision, recall and F1 score values for each of the AGAGE sites. Scores can range from 0 to 1, with higher scores indicating higher performance.

| <i>Station Designation</i> | <i>Precision</i> | <i>Recall</i> | <i>F1 score</i> |
|----------------------------|------------------|---------------|-----------------|
| CGO                        | 0.953            | 0.818         | 0.880           |
| CMN                        | 0.957            | 0.588         | 0.728           |
| GSN                        | 0.925            | 0.608         | 0.734           |
| JFJ                        | 0.941            | 0.674         | 0.785           |
| MHD                        | 0.917            | 0.672         | 0.776           |
| RPB                        | 0.884            | 0.521         | 0.655           |
| SMO                        | 0.896            | 0.404         | 0.557           |
| THD                        | 0.915            | 0.437         | 0.591           |
| ZEP                        | 0.948            | 0.718         | 0.817           |



### 3.2 Final Hyperparameter Sets

Note that hyperparameters not listed are as default in the documentation.

**Table S3.** Hyperparameter sets used in the final versions of the RF models for AGAGE sites.

(a) Four AGAGE sites: Kennaoak/Cape Grim (CGO), Monte Cimone (CMN), Gosan (GSN), Jungfraujoch (JFJ).

| <i>Parameter</i> | <i>CGO</i> | <i>CMN</i> | <i>GSN</i> | <i>JFJ</i> |
|------------------|------------|------------|------------|------------|
| random_state     | 42         | 42         | 42         | 42         |
| n_estimators     | 100        | 100        | 200        | 100        |
| max_depth        | 5          | 3          | 5          | 5          |
| criterion        | 'entropy'  | 'entropy'  | 'entropy'  | 'entropy'  |
| bootstrap        | False      | False      | False      | False      |
| max_features     | 'sqrt'     | 'sqrt'     | None       | 'sqrt'     |

(b) Five AGAGE sites: Mace Head (MHD), Ragged Point (RPB), Cape Matatula (SMO), Trinidad Head (THD), Zeppelin (ZEP).

| <i>Parameter</i>  | <i>MHD</i> | <i>RPB</i> | <i>SMO</i> | <i>THD</i> | <i>ZEP</i> |
|-------------------|------------|------------|------------|------------|------------|
| random_state      | 42         | 42         | 42         | 42         | 42         |
| n_estimators      | 200        | 100        | 50         | 100        | 200        |
| max_depth         | 8          | 5          | 5          | 5          | 5          |
| criterion         | 'entropy'  | 'entropy'  | 'log_loss' | 'gini'     | 'entropy'  |
| bootstrap         | False      | False      | False      | True       | False      |
| min_samples_split | 5          | 5          | 3          | 2          | 2          |
| max_features      | 'sqrt'     | 'log2'     | 'sqrt'     | 'sqrt'     | 'sqrt'     |

### 3.3 Random Forest Confusion Matrix Map

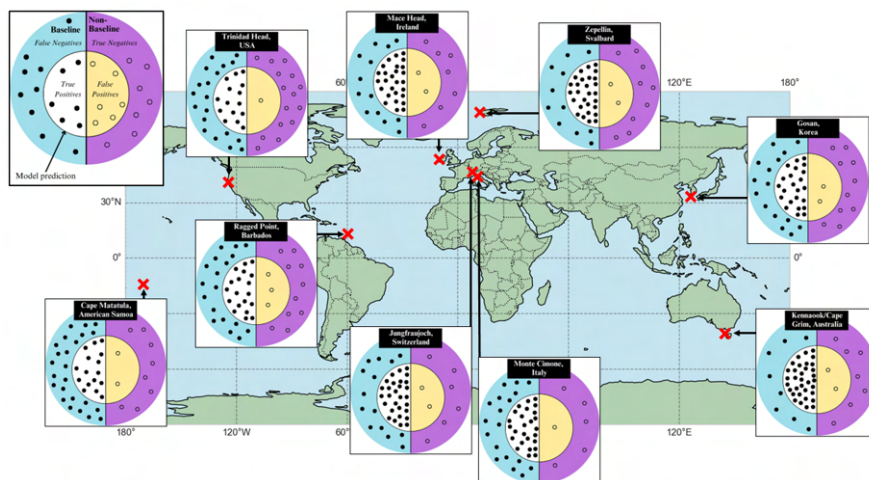

**Figure S2.** A map showing the locations of the nine AGAGE sites, with confusion matrix-derived plots at each location. Each confusion matrix was normalised, to remove visual differences due to testing set sizes; each point represents approximately 2% of the total test set (rounding means that the total number of points on each plot range from 49 to 51). The left half of each circle represents true baseline points, and the right half true non-baseline points. The inner circle shows the random forest model prediction of baseline points. The key in the top left indicates where true or false positives and negatives lie, as explained in the main text.

3.4 Random Forest MAPE Heatmap

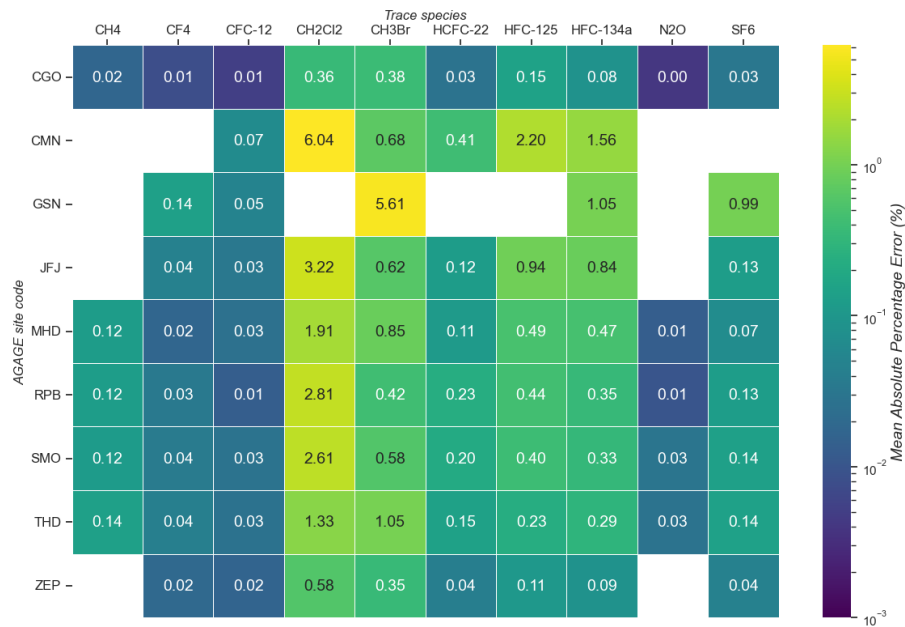

**Figure S3.** Mean Absolute Percentage Errors (MAPE) for the random forest model for selected AGAGE species across the nine monitoring sites. White denotes species that were not available at a particular site.

#### 4.1 Final Hyperparameter Sets

Note that hyperparameters not listed are as default in the documentation.

**Table S4.** Hyperparameter sets used in the final versions of the MLP models for AGAGE sites.

(a) Four AGAGE sites: Kennaoook/Cape Grim (CGO), Monte Cimone (CMN), Gosan (GSN), Jungfraujoch (JFJ).

| <i>Parameter</i>   | <i>CGO</i> | <i>CMN</i> | <i>GSN</i> | <i>JFJ</i>   |
|--------------------|------------|------------|------------|--------------|
| random_state       | 42         | 42         | 42         | 42           |
| max_iter           | 1000       | 1000       | 1000       | 50           |
| hidden_layer_sizes | (50,)      | (100,)     | (100,)     | (25,)        |
| shuffle            | False      | False      | False      | False        |
| alpha              | 0.05       | 0.5        | 0.0001     | 0.1          |
| learning_rate      | 'constant' | 'constant' | 'constant' | 'invscaling' |
| batch_size         | 100        | 250        | 100        | 100          |
| early_stopping     | True       | False      | False      | True         |
| learning_rate_init | 0.001      | 0.01       | 0.01       | 0.01         |
| epsilon            | 1e-8       | 1e-8       | 1e-8       | 2e-10        |
| beta_2             | 0.9        | 0.9        | 0.9        | 0.8          |
| tol                | 1e-4       | 1e-4       | 1e-4       | 1e-3         |

(b) Five AGAGE sites: Mace Head (MHD), Ragged Point (RPB), Cape Matatula (SMO), Trinidad Head (THD), Zeppelin (ZEP).

| <i>Parameter</i>   | <i>MHD</i> | <i>RPB</i> | <i>SMO</i> | <i>THD</i> | <i>ZEP</i> |
|--------------------|------------|------------|------------|------------|------------|
| random_state       | 42         | 1          | 42         | 42         | 42         |
| max_iter           | 1000       | 500        | 1000       | 1000       | 1000       |
| hidden_layer_sizes | (200,)     | (200,)     | (100,)     | (100,)     | (200,150,) |
| shuffle            | False      | False      | False      | False      | False      |
| alpha              | 0.05       | 0.0001     | 0.001      | 0.05       | 0.05       |
| learning_rate      | 'constant' | 'constant' | 'constant' | 'constant' | 'constant' |
| batch_size         | 100        | 100        | 100        | 100        | 100        |
| early_stopping     | True       | True       | True       | True       | True       |
| learning_rate_init | 0.01       | 0.001      | 0.001      | 0.001      | 0.01       |
| beta_2             | 0.9        | 0.9        | 0.9        | 0.9        | 0.9        |

## 4.2 Feature Importance

**Table S5.** A tabular summary of the top three most influential feature groups when training the final MLP model for each site. u- and v- wind encompass all heights, locations and times. 'PBLH' represents planetary boundary layer height.

| <i>Station Designation</i> | <i>Most Importance</i> | <i>Second</i> | <i>Third</i>     |
|----------------------------|------------------------|---------------|------------------|
| CGO                        | u-wind                 | v-wind        | PBLH             |
| CMN                        | PBLH                   | u-wind        | Surface pressure |
| GSN                        | PBLH                   | u-wind        | Surface pressure |
| JFJ                        | v-wind                 | u-wind        | Surface Pressure |
| MHD                        | u-wind                 | v-wind        | PBLH             |
| RPB                        | u-wind                 | v-wind        | PBLH             |
| SMO                        | u-wind                 | w-wind        | PBLH             |
| THD                        | PBLH                   | v-wind        | u-wind           |
| ZEP                        | v-wind                 | u-wind        | PBLH             |

4.3 MLP Plots

25 4.4 Kennaoook/Cape Grim, Australia

4.4.1 CH<sub>4</sub>

Mole fraction time series

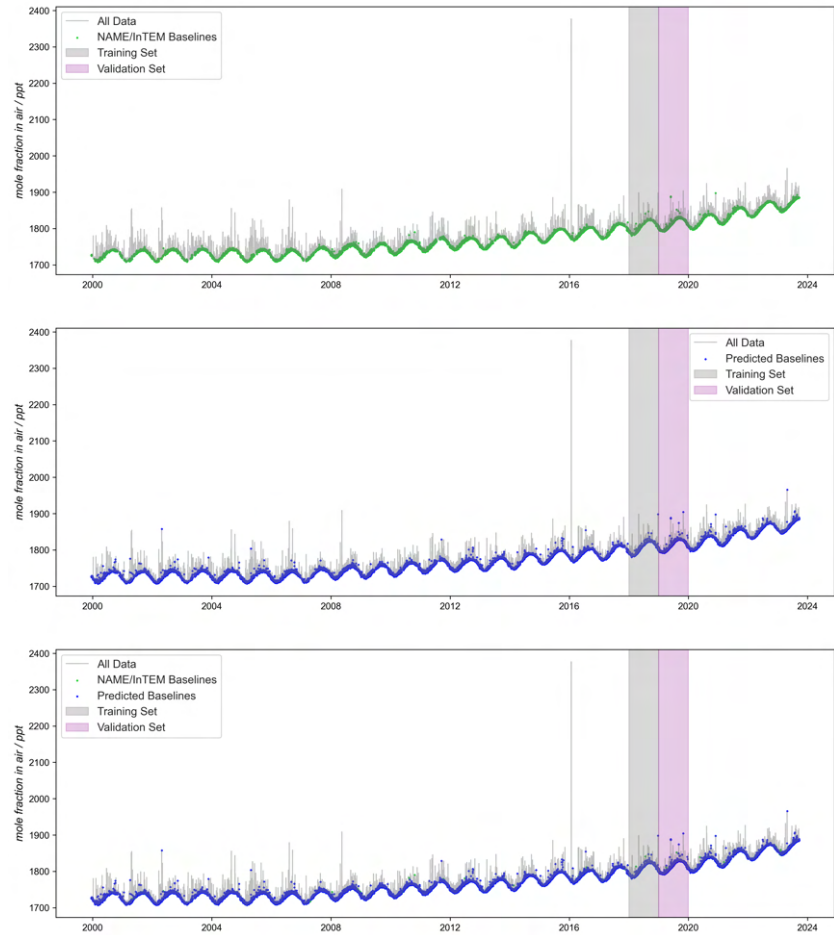

Monthly means

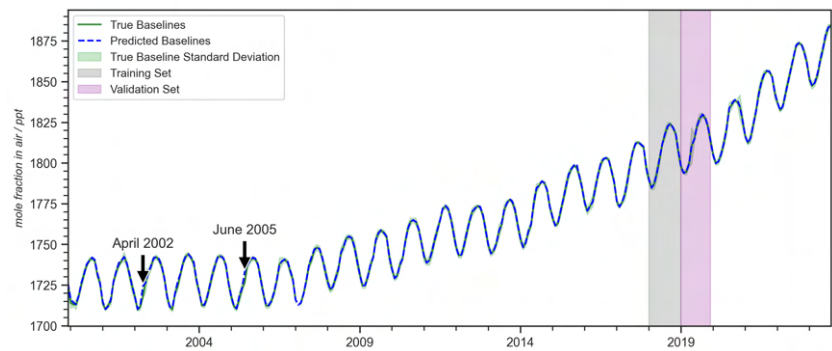

4.4.2 CF<sub>4</sub>

30 Mole fraction time series

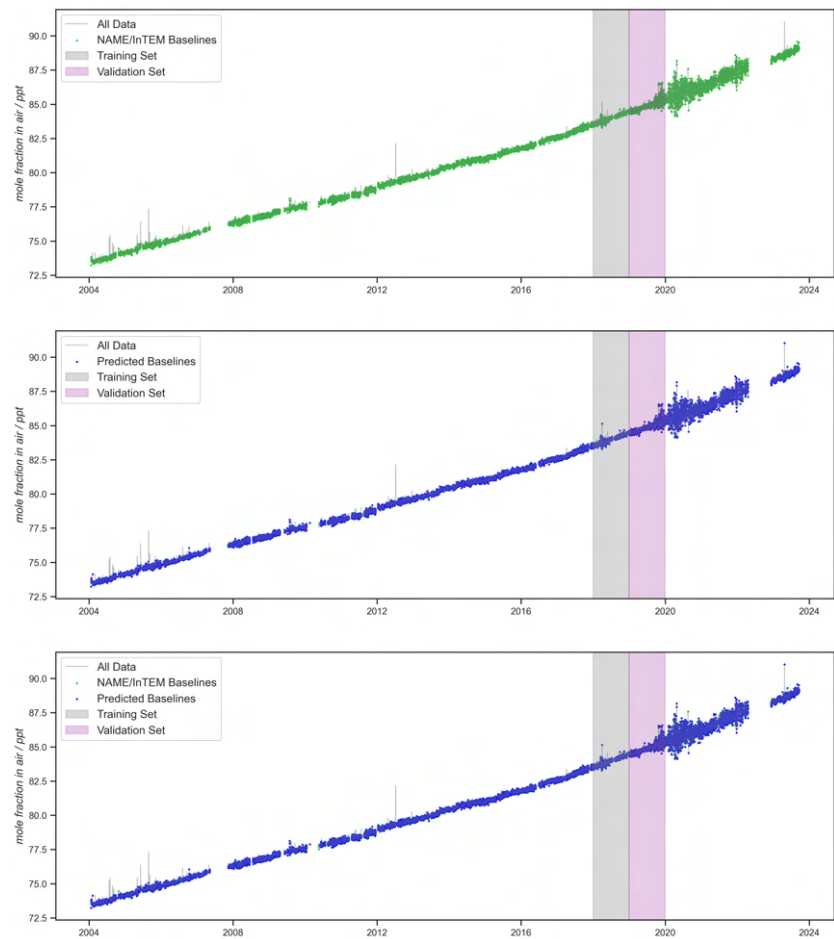

Monthly means

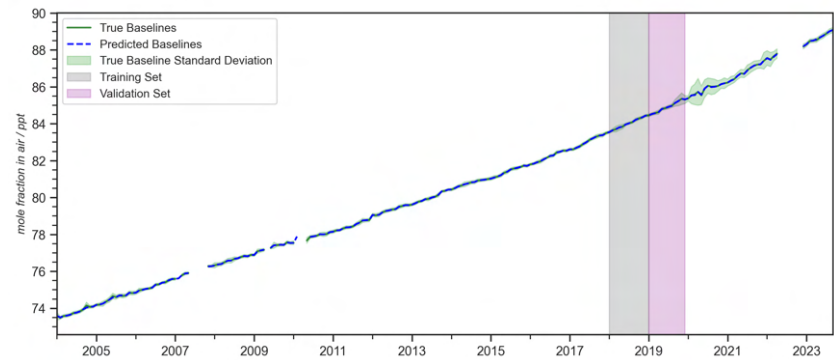



4.4.3 CFC-12

Mole fraction time series

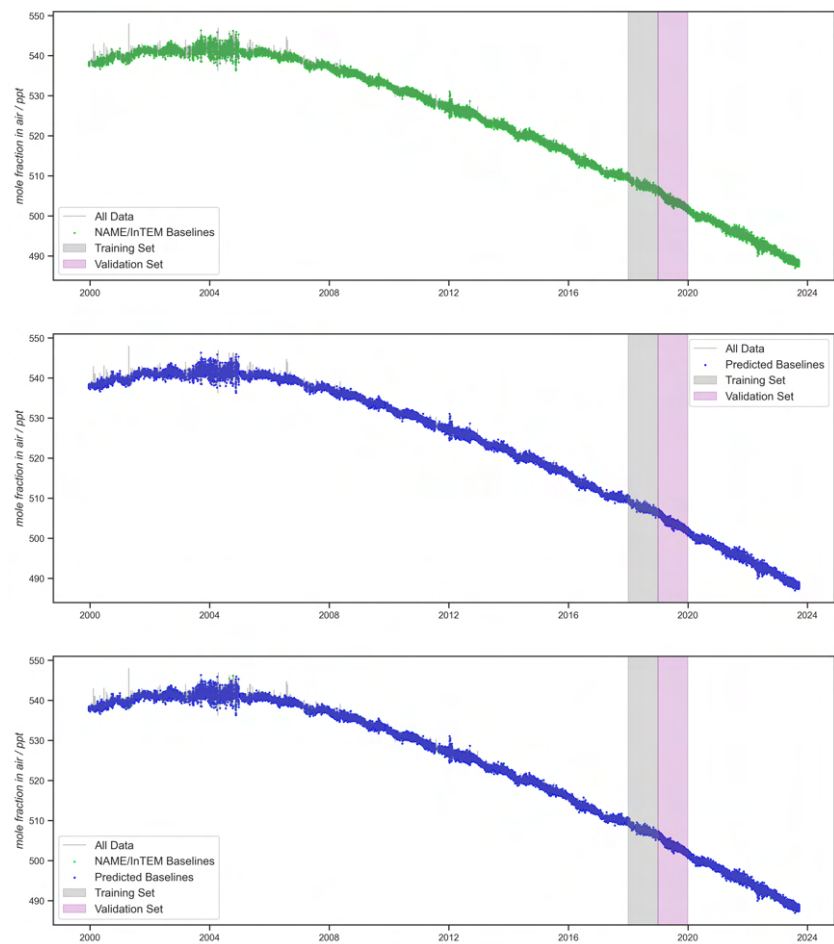

Monthly means

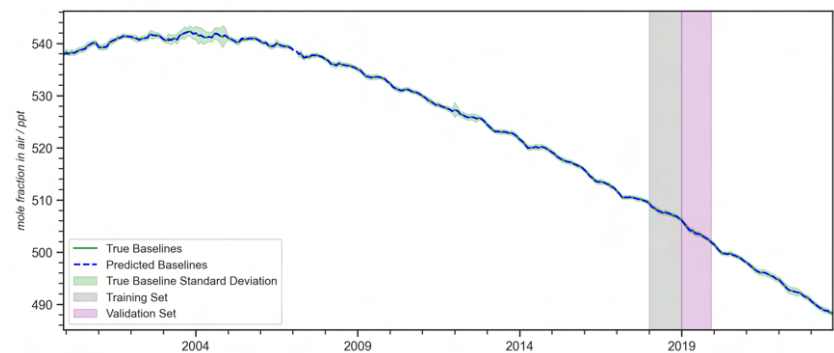

Mole fraction time series

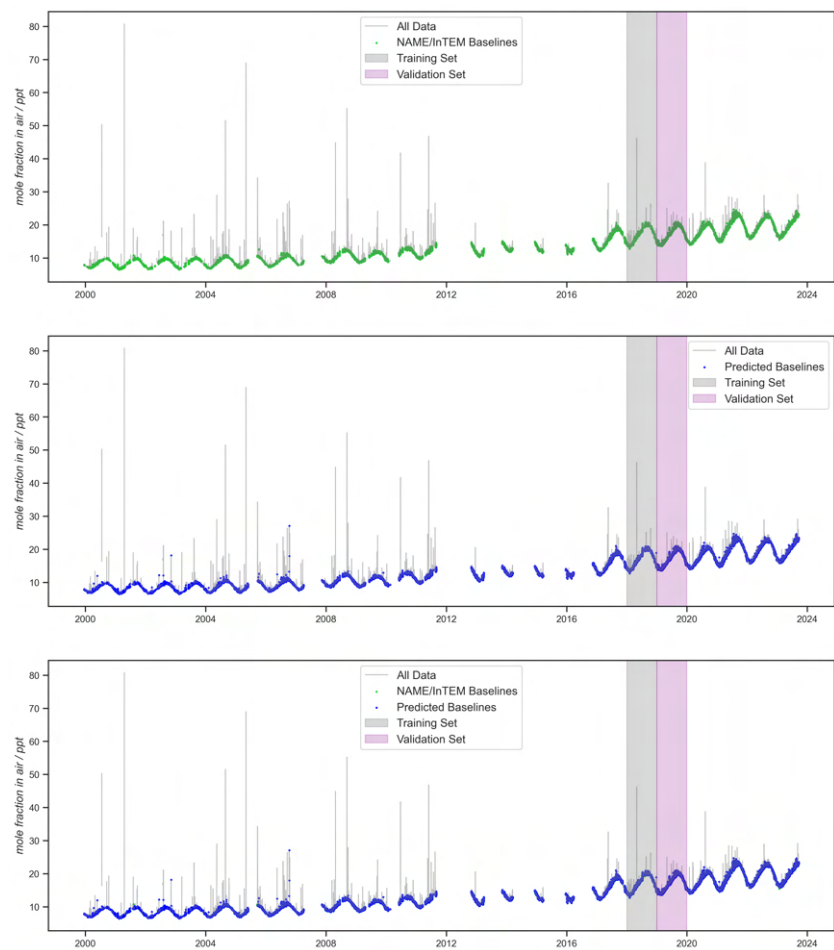

Monthly means

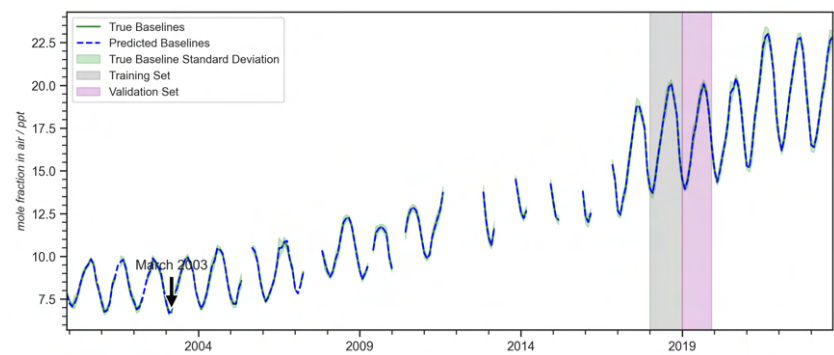

4.4.5 CH<sub>3</sub>Br

Mole fraction time series

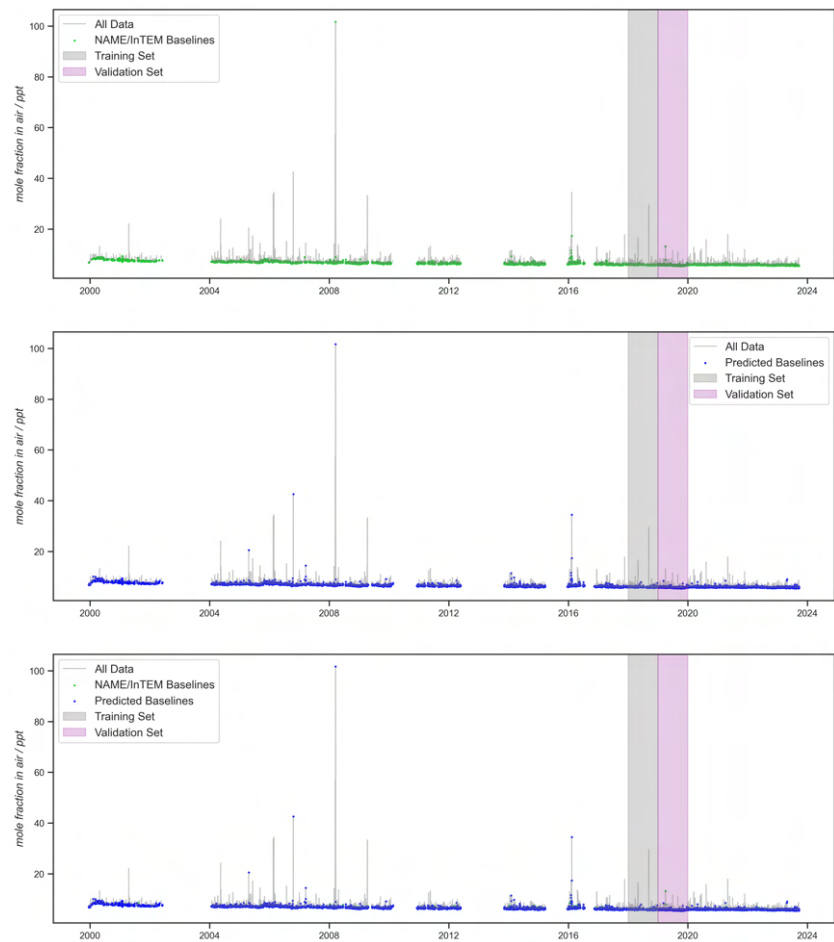

40 Monthly means

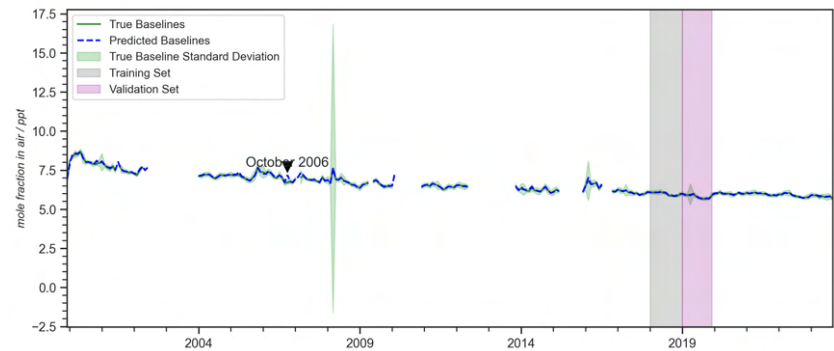

4.4.6 HCFC-22

Mole fraction time series

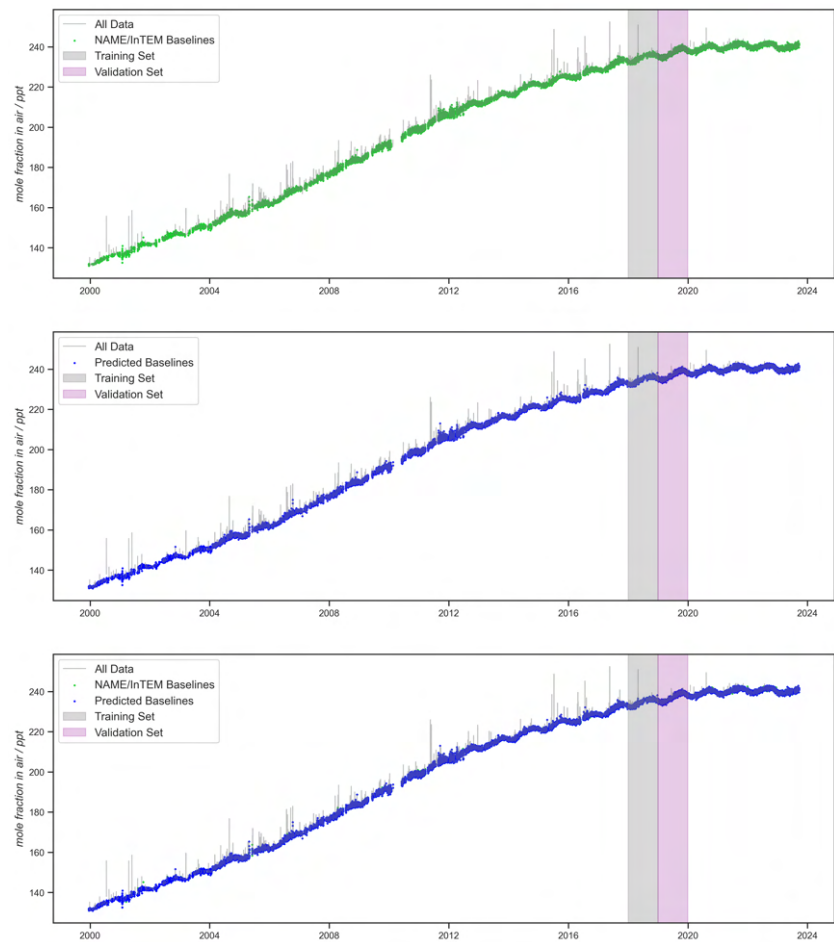

Monthly means

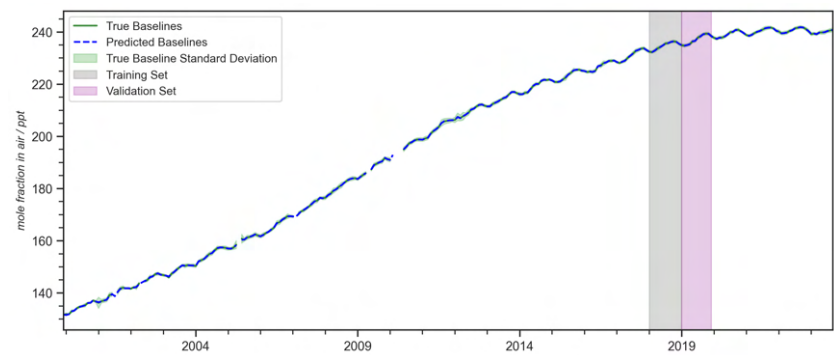

4.4.7 HFC-125

45 Mole fraction time series

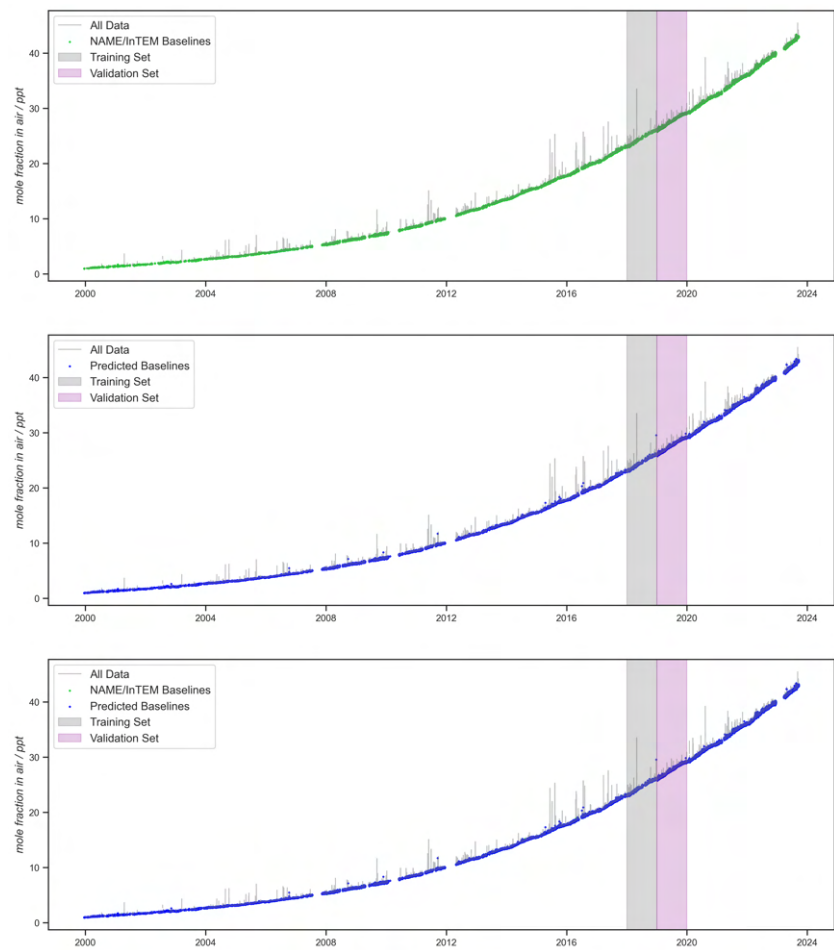

Monthly means

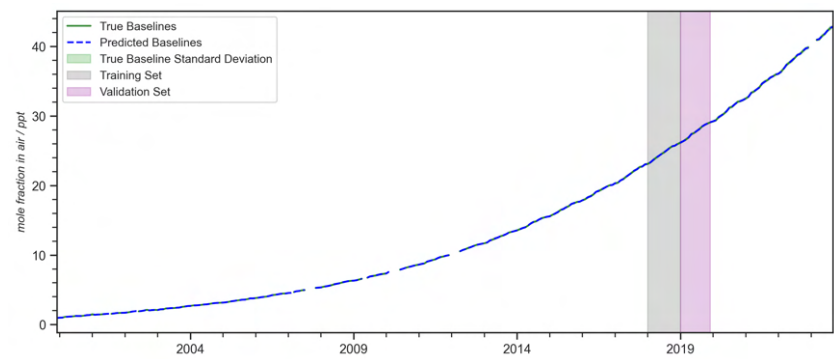

4.4.8 HFC-134a

Mole fraction time series

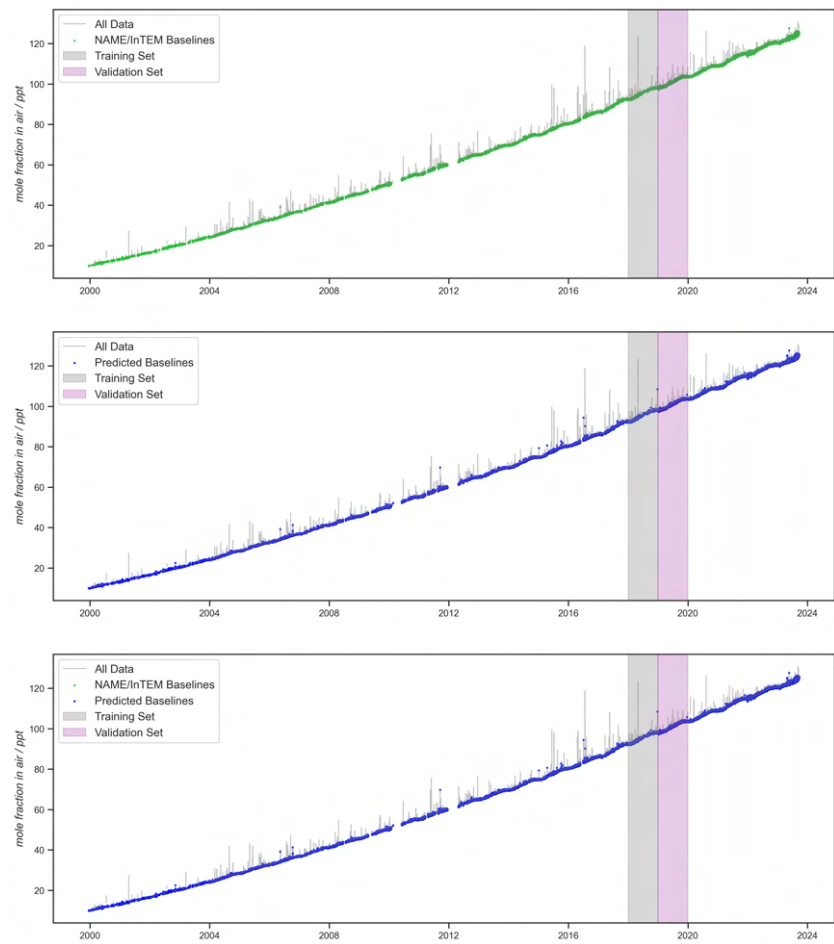

Monthly means

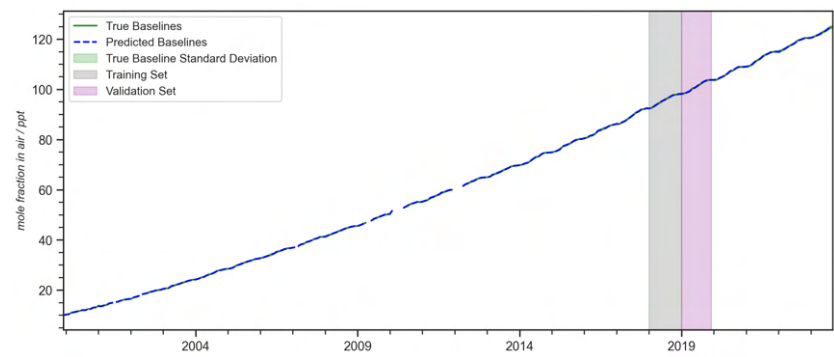

Mole fraction time series

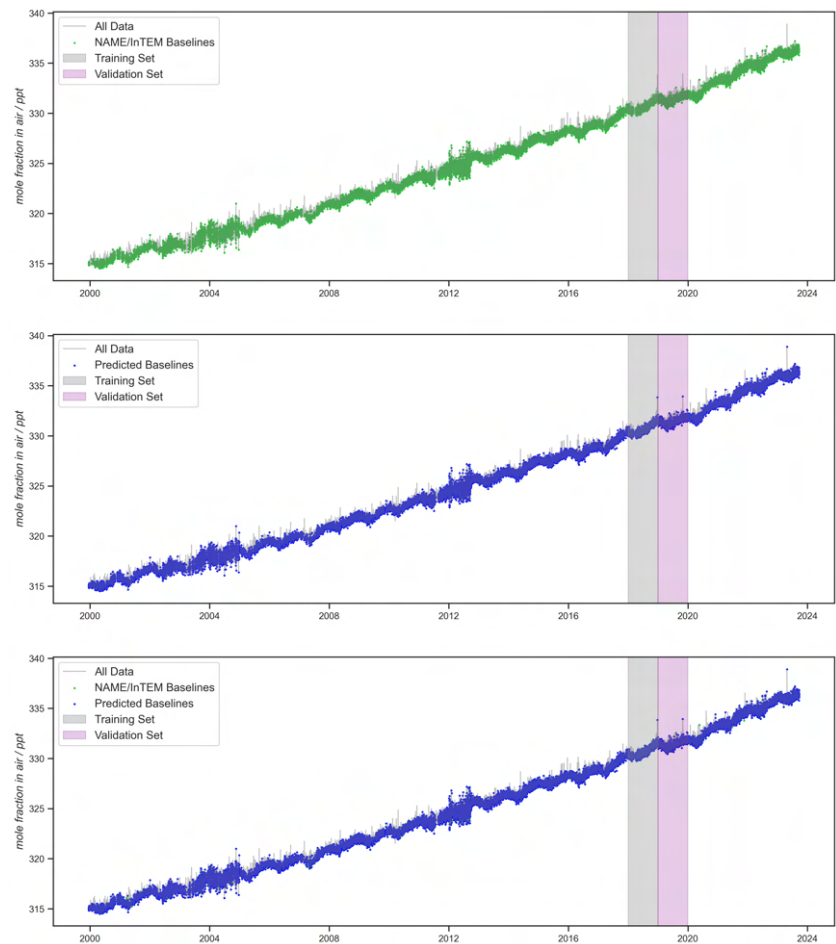

Monthly means

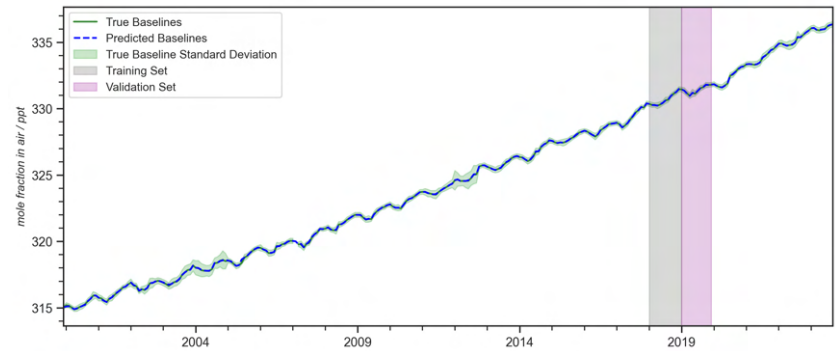

4.4.10 SF<sub>6</sub>

Mole fraction time series

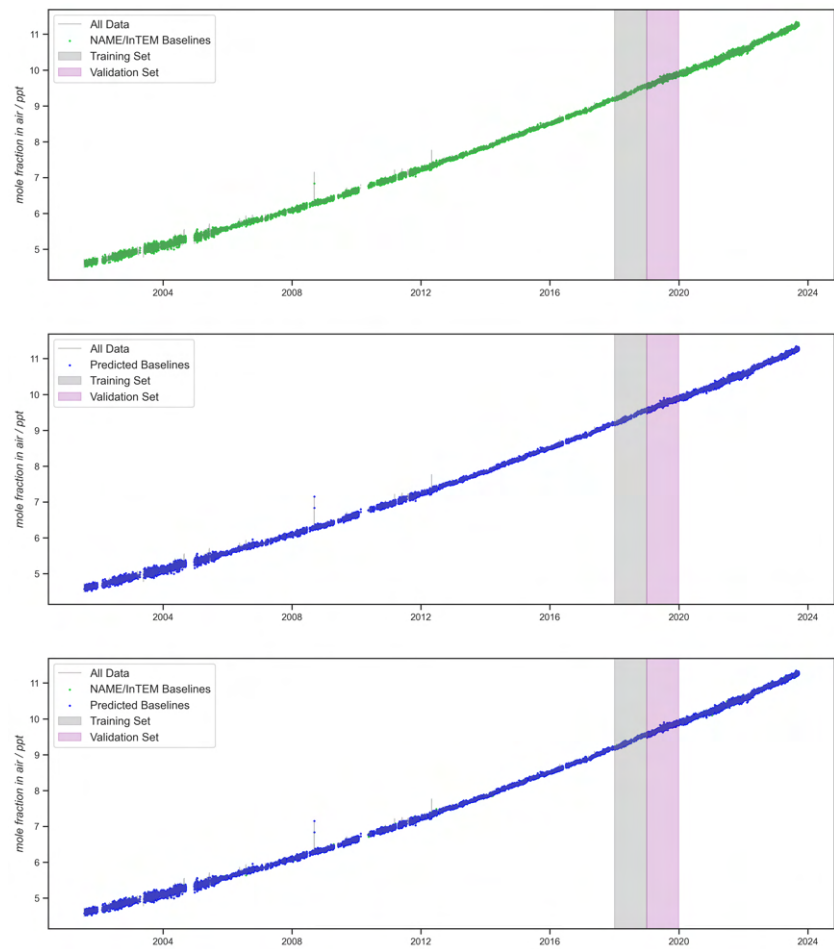

55 Monthly means

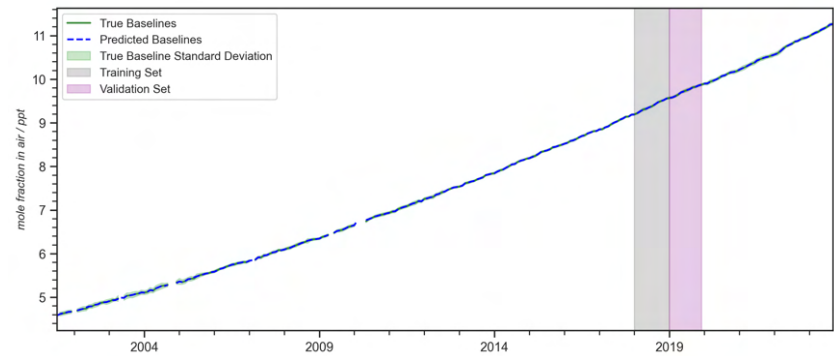



4.5 Monte Cimone, Italy

4.5.1 CFC-12

Mole fraction time series

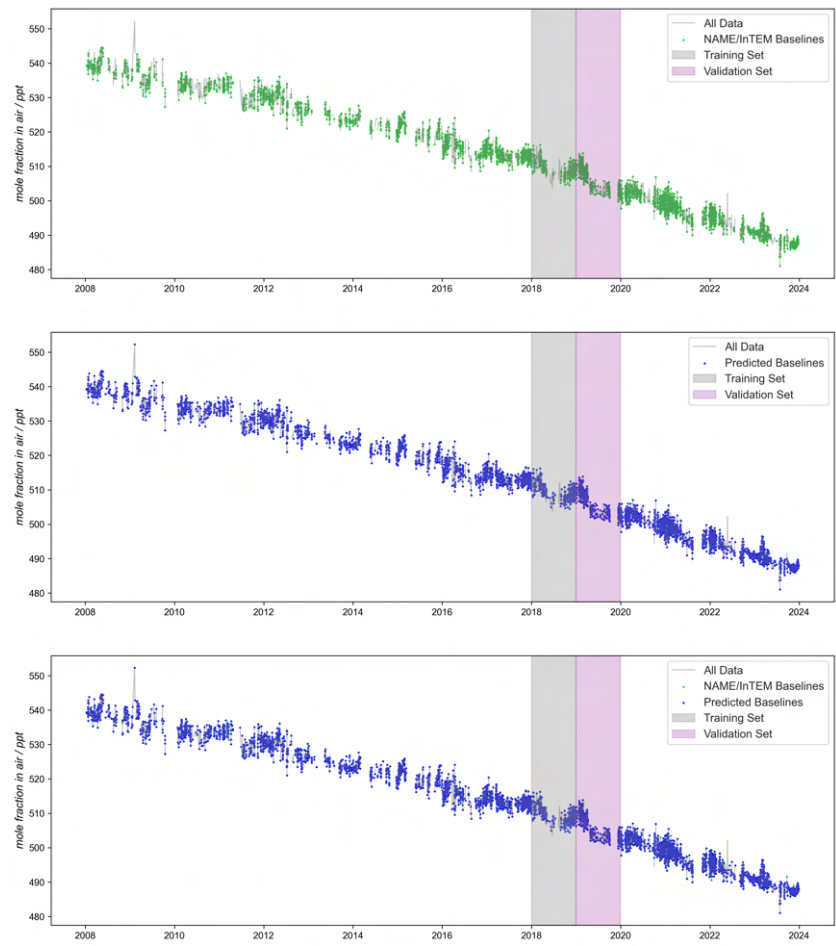

Monthly means

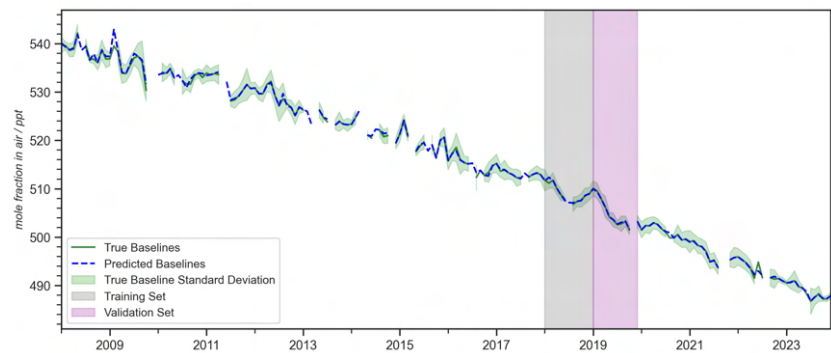

Mole fraction time series

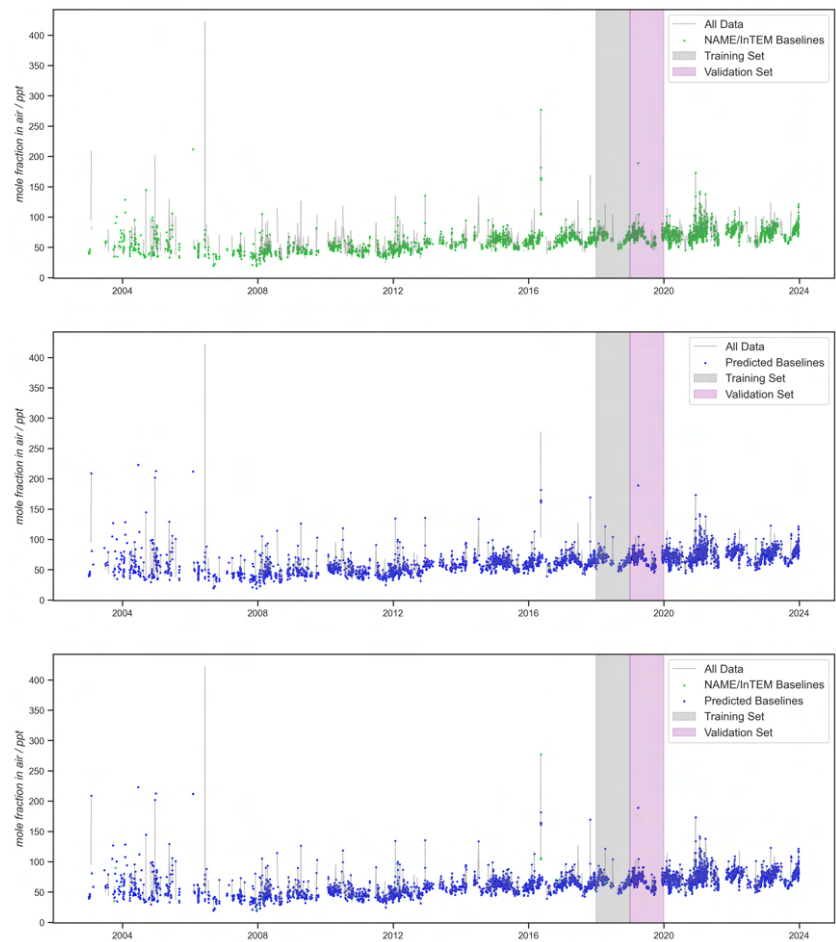

Monthly means

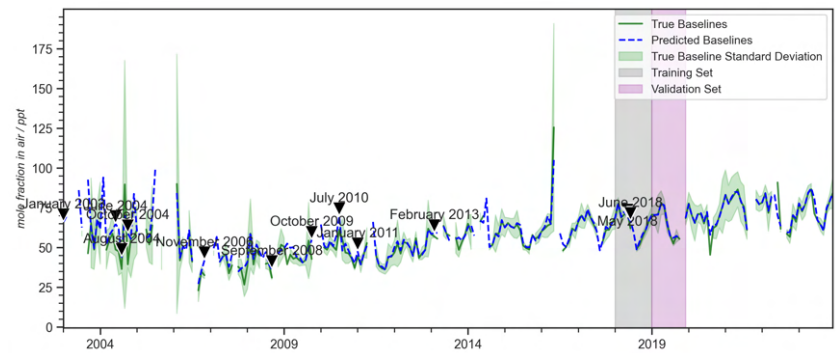

4.5.3 CH<sub>3</sub>Br

Mole fraction time series

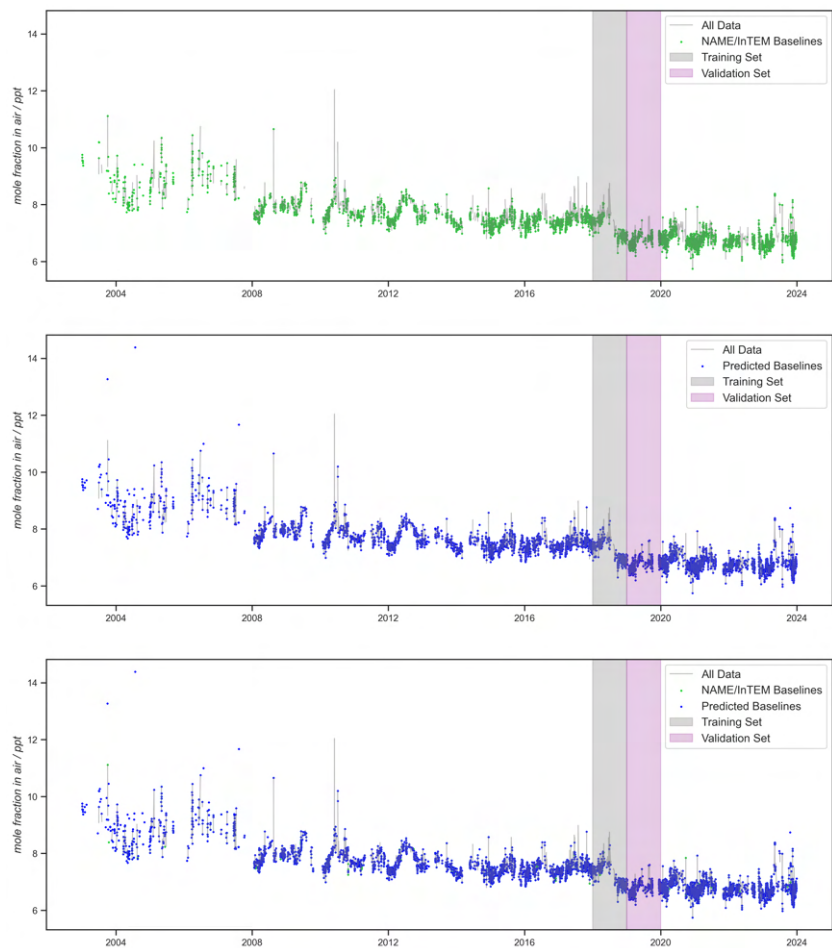

65 Monthly means

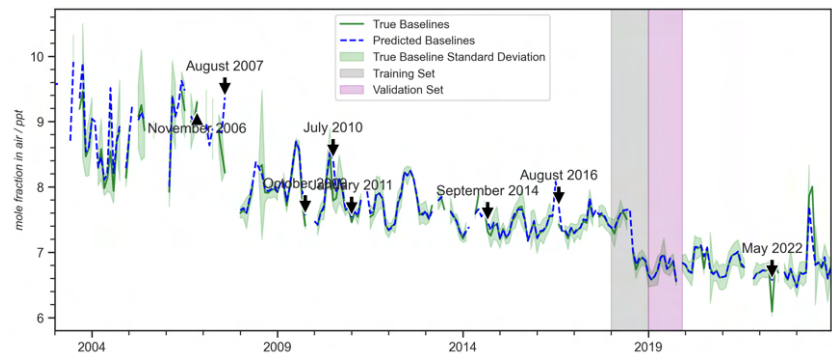

4.5.4 HCFC-22

Mole fraction time series

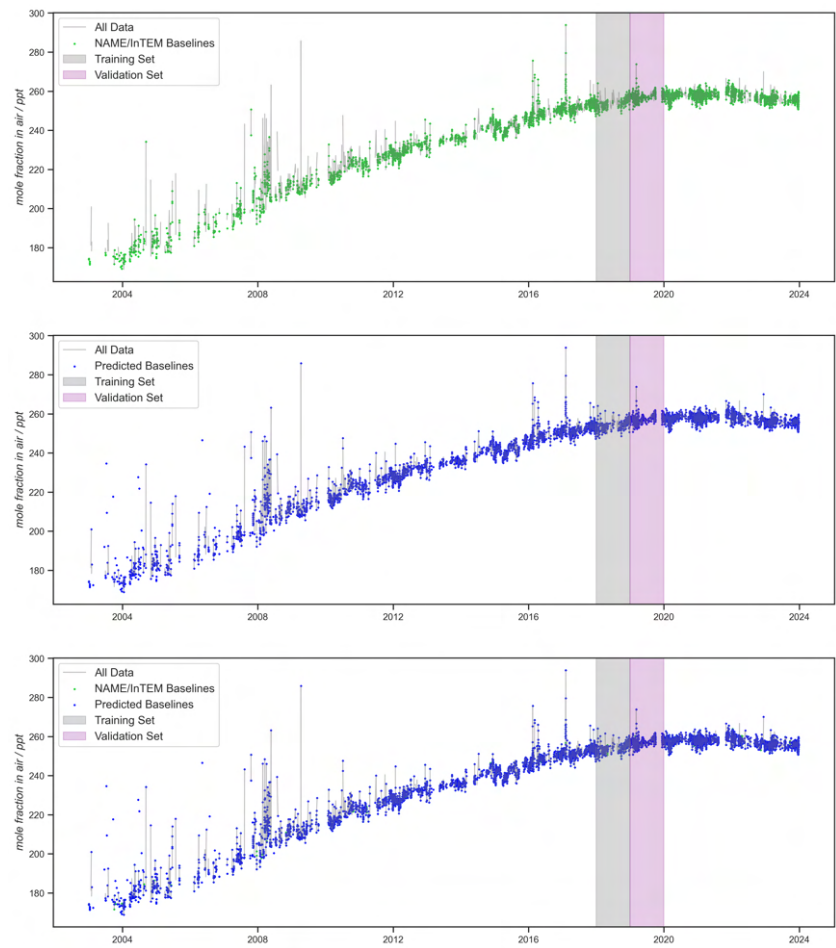

Monthly means

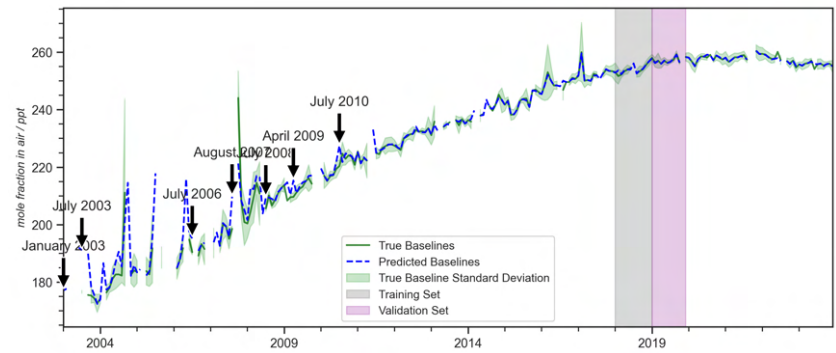

4.5.5 HFC-125

70 Mole fraction time series

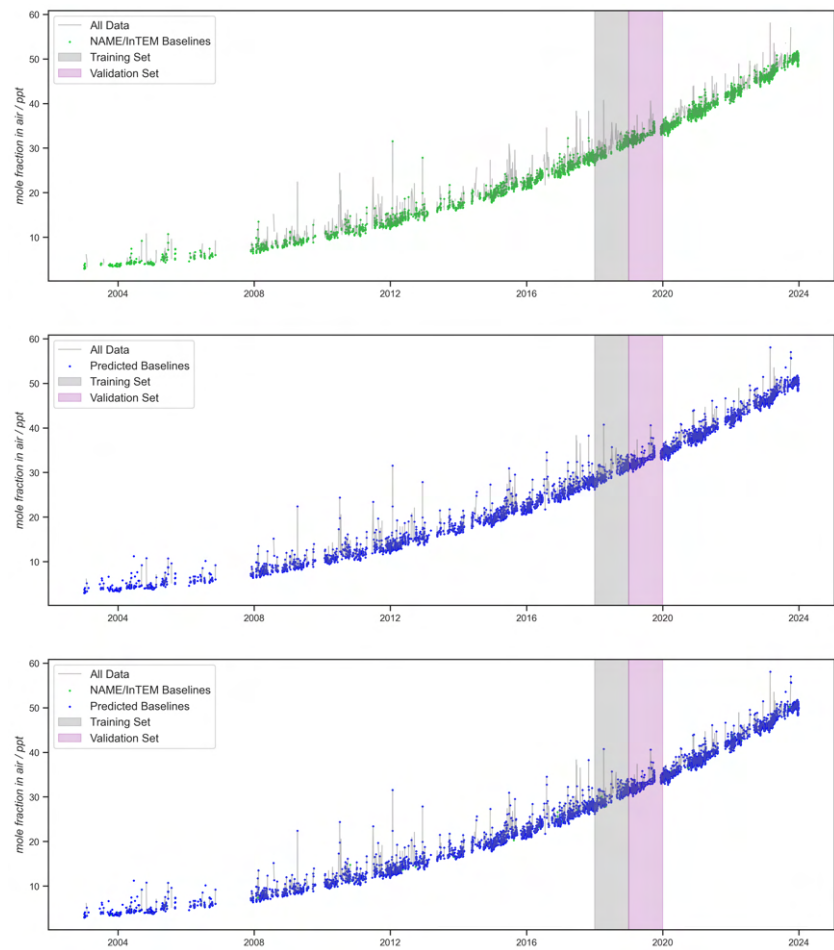

Monthly means

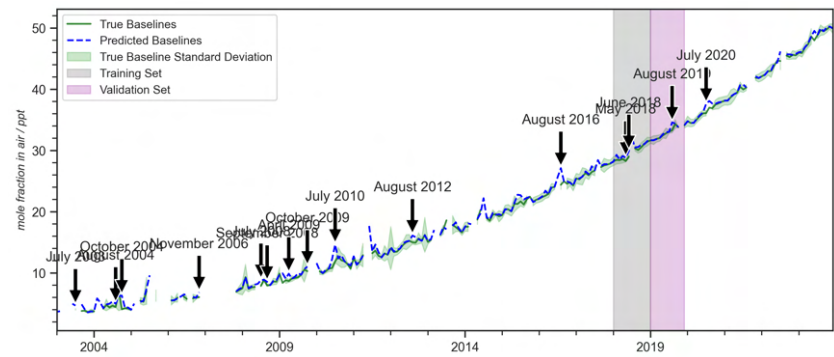

4.5.6 HFC-134a

Mole fraction time series

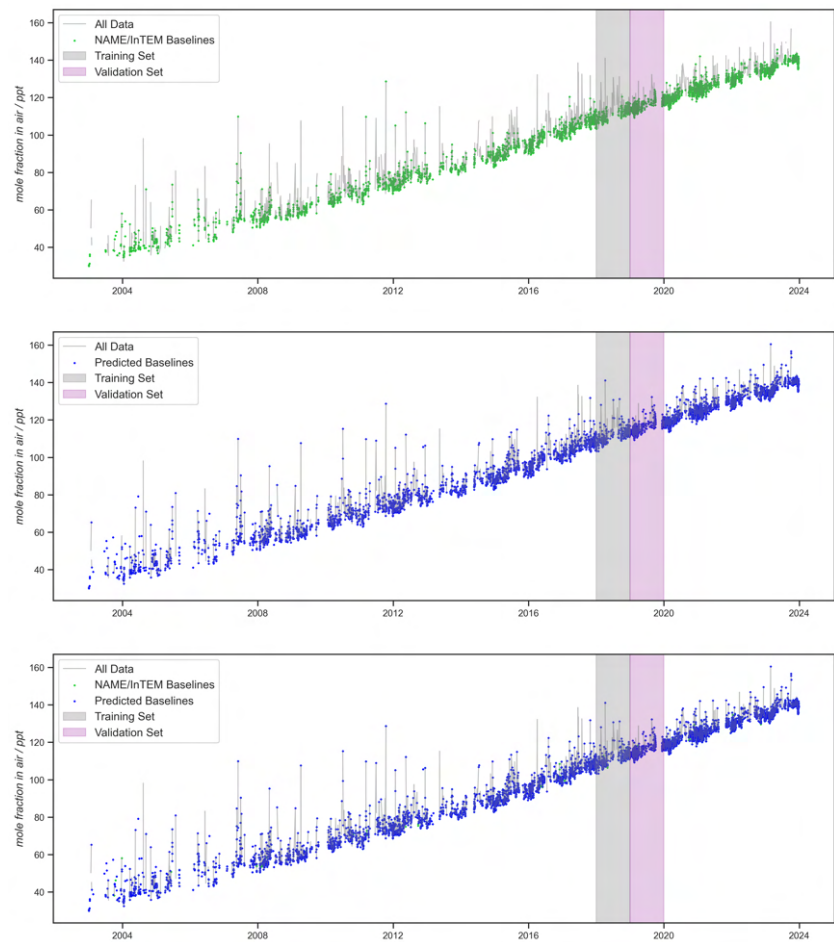

Monthly means

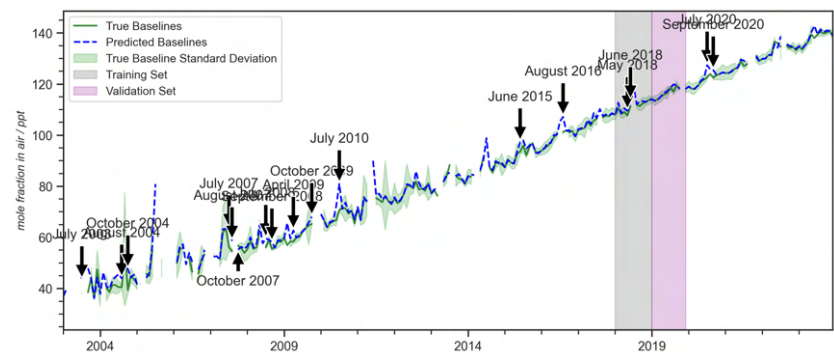

4.6.1 CF<sub>4</sub>

Mole fraction time series

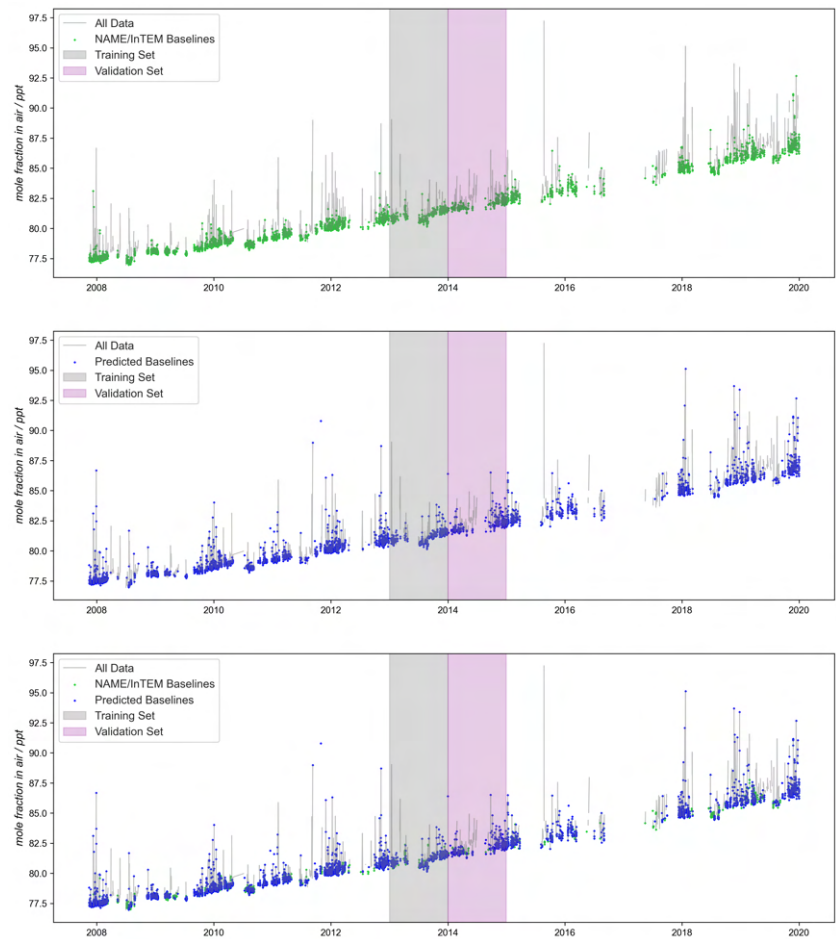



Monthly means

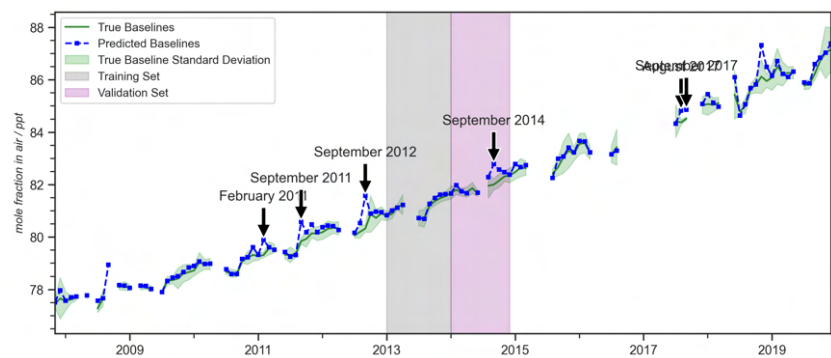

## 4.6.2 CFC-12

### 80 Mole fraction time series

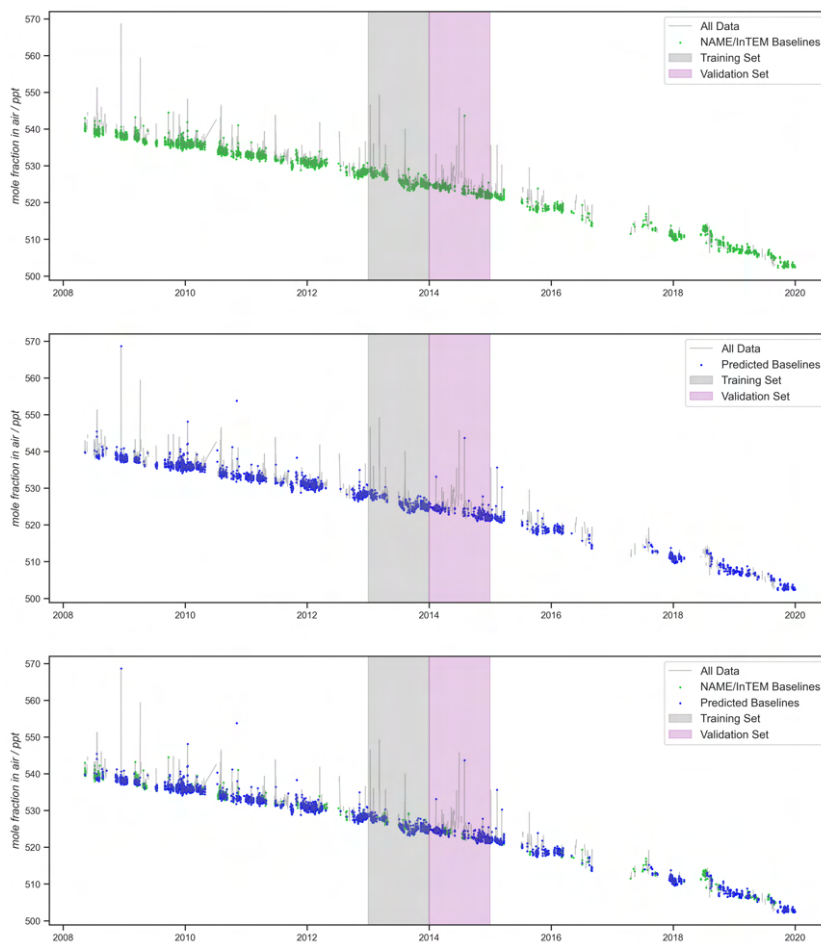

### Monthly means

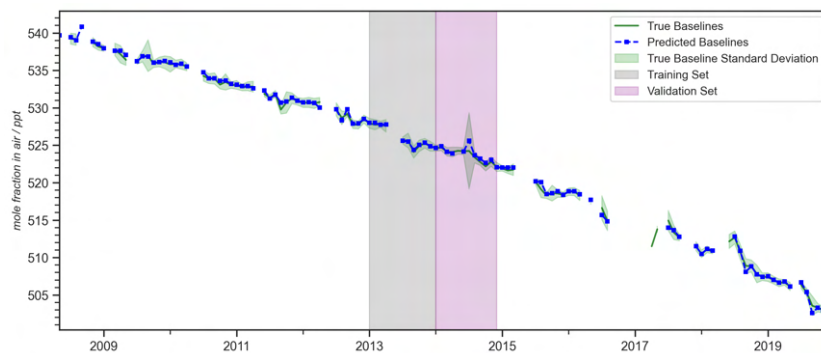

### 4.6.3 CH<sub>3</sub>Br

#### Mole fraction time series

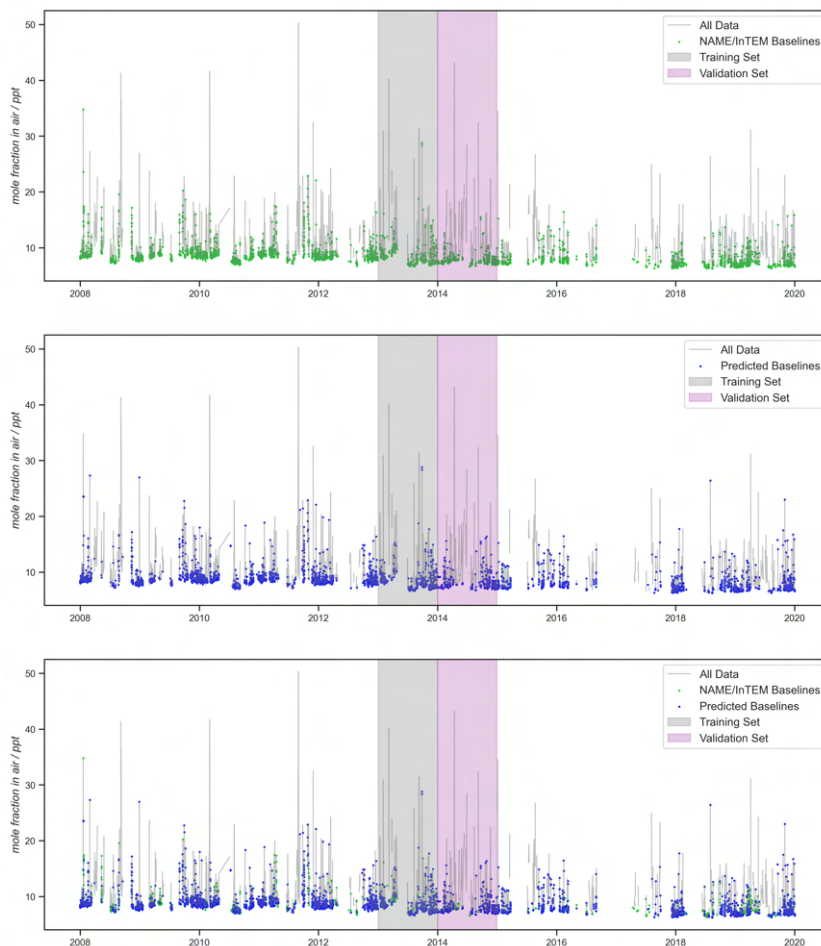

#### Monthly means

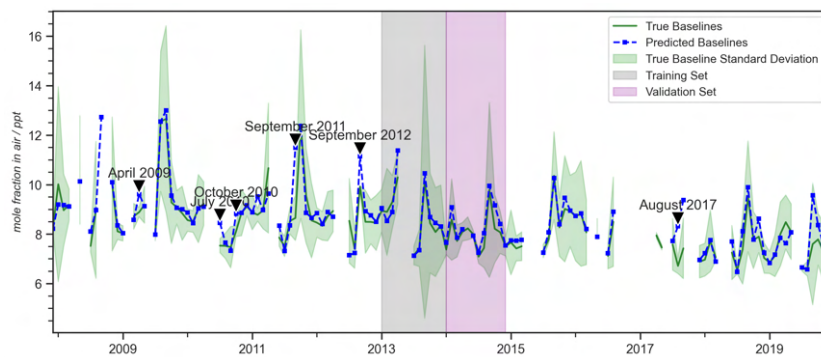

Mole fraction time series

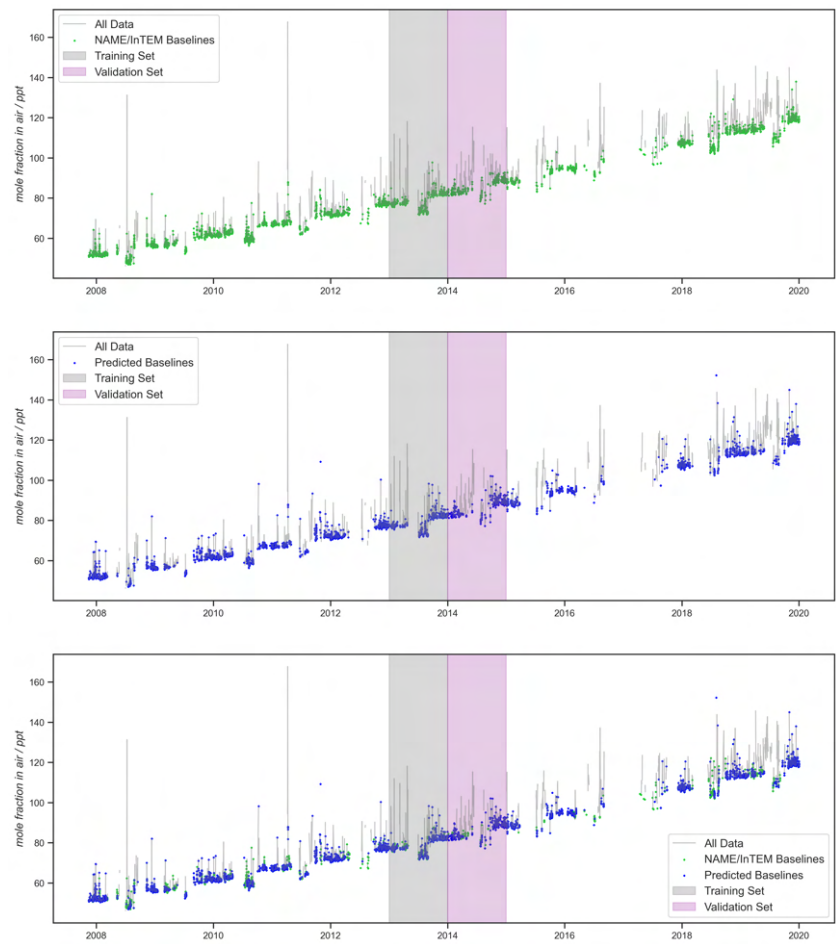

Monthly means

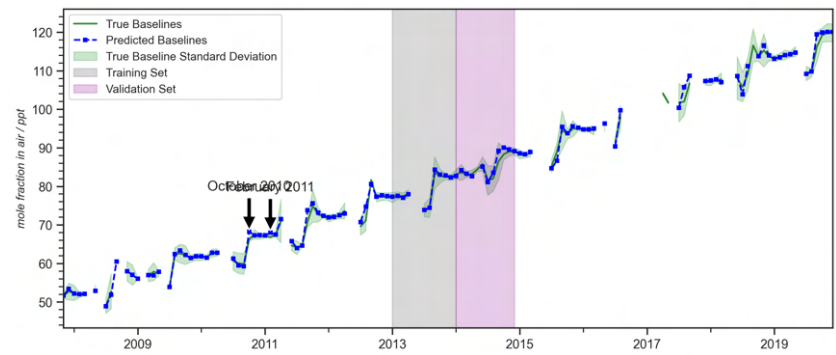

## 4.6.5 SF<sub>6</sub>

### Mole fraction time series

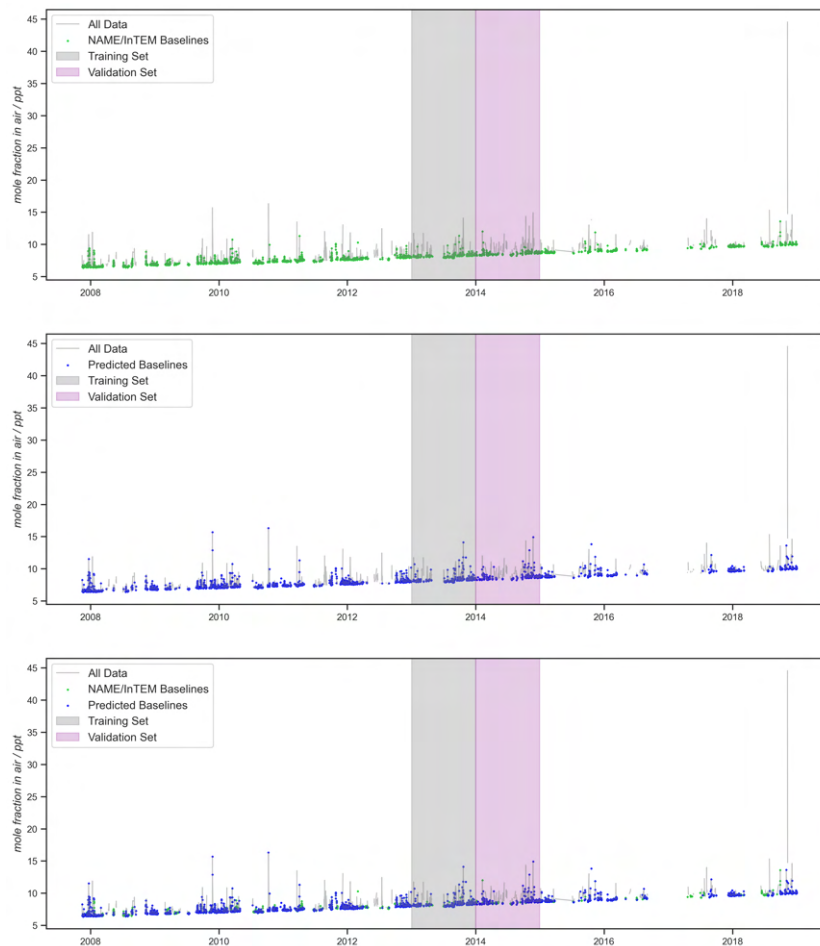

### 90 Monthly means

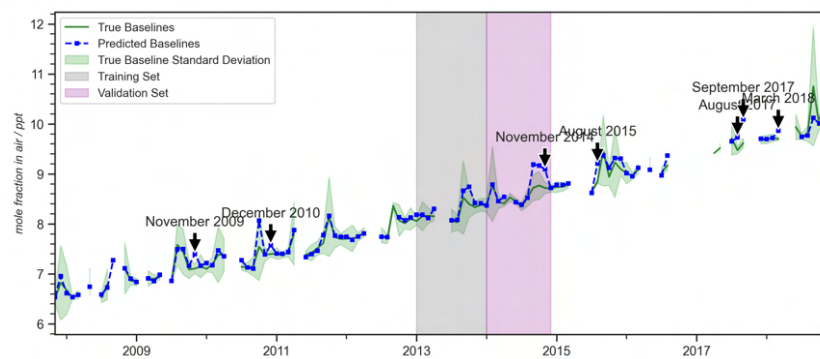

4.7 Jungfraujoch, Switzerland

4.7.1 CF<sub>4</sub>

Mole fraction time series

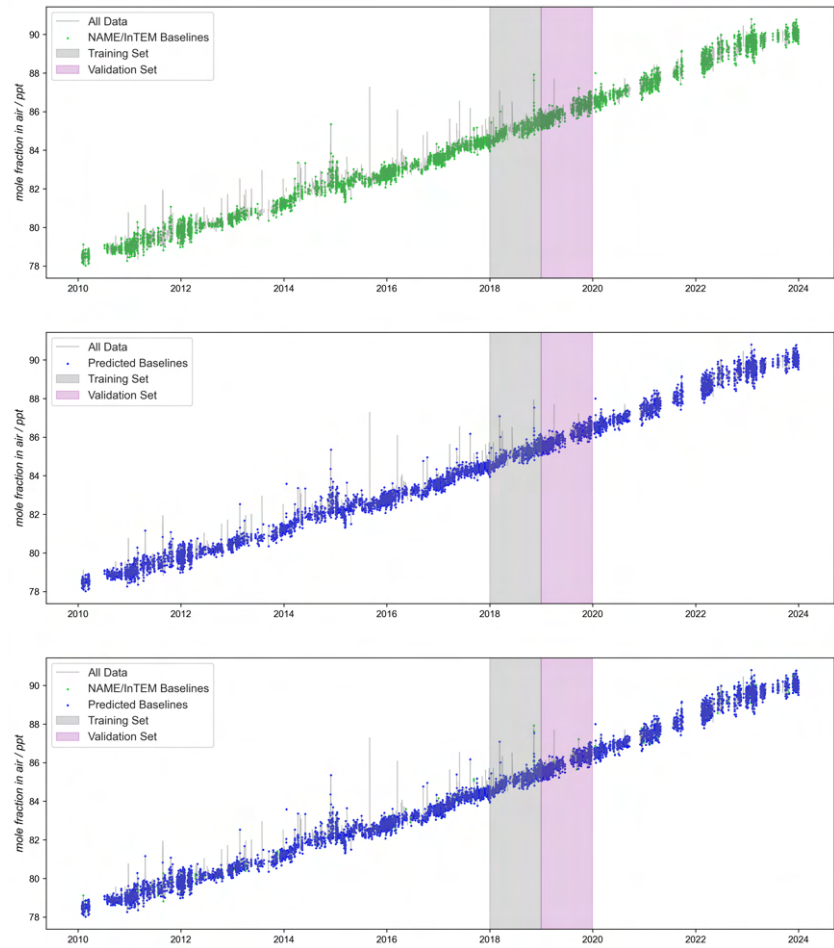

Monthly means

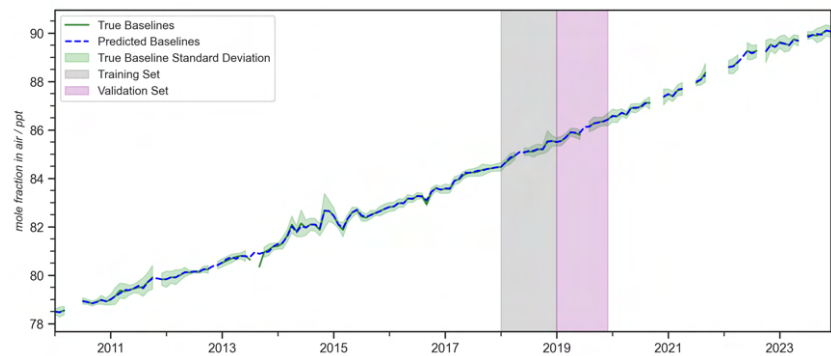

Mole fraction time series

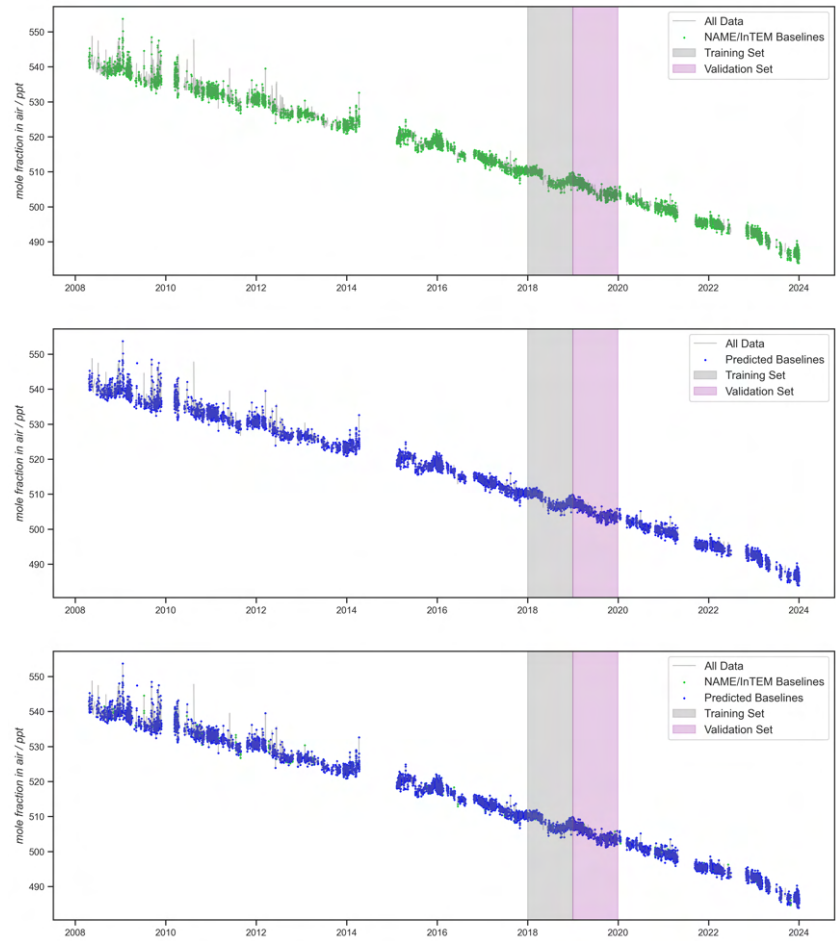

Monthly means

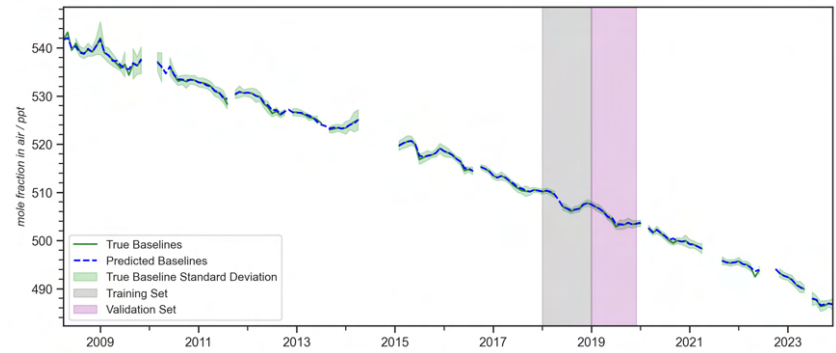



4.7.3 CH<sub>2</sub>Cl<sub>2</sub>

Mole fraction time series

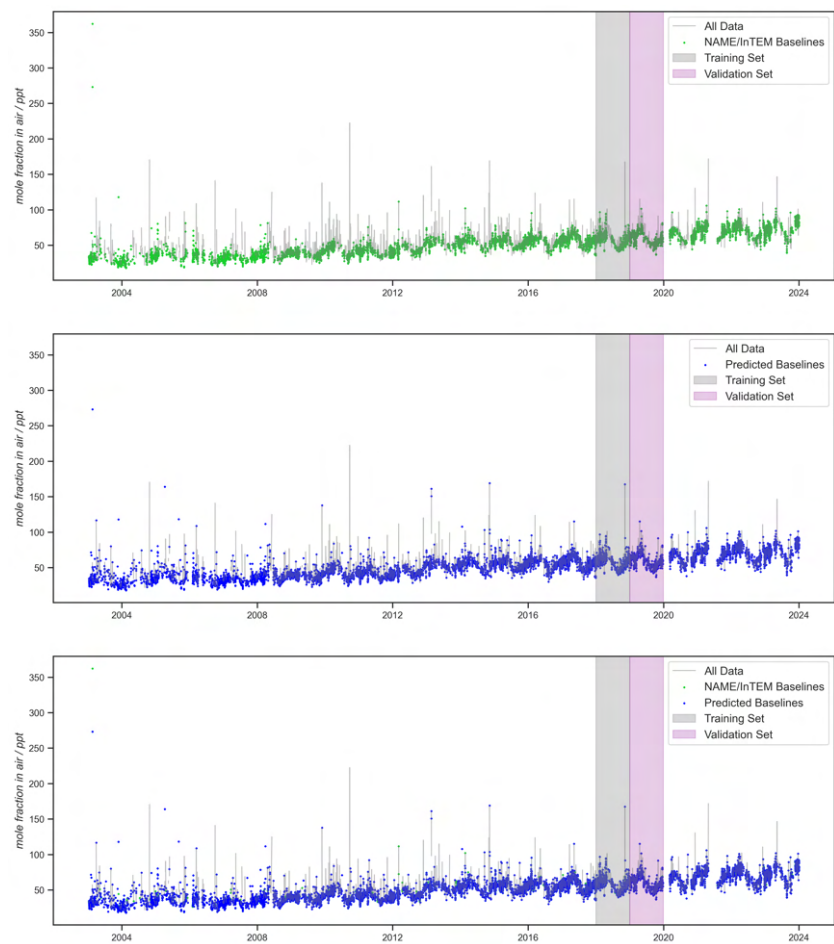

100 Monthly means

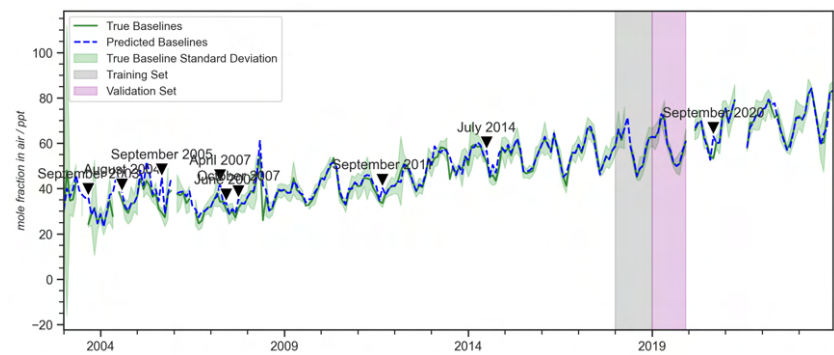

## 4.7.4 CH<sub>3</sub>Br

### Mole fraction time series

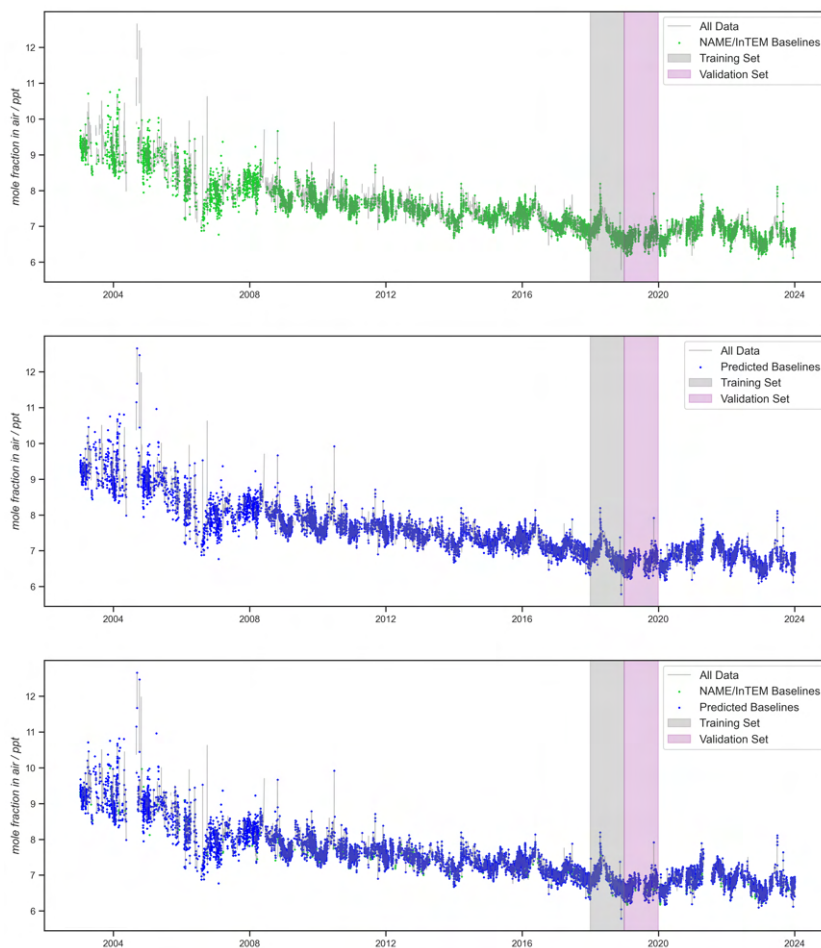

### Monthly means

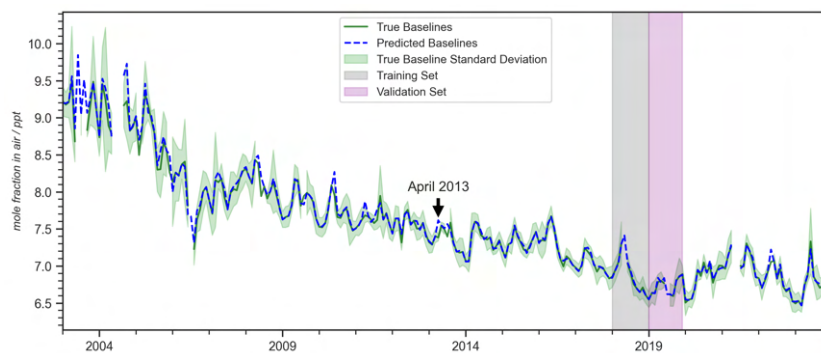

4.7.5 HCFC-22

105 Mole fraction time series

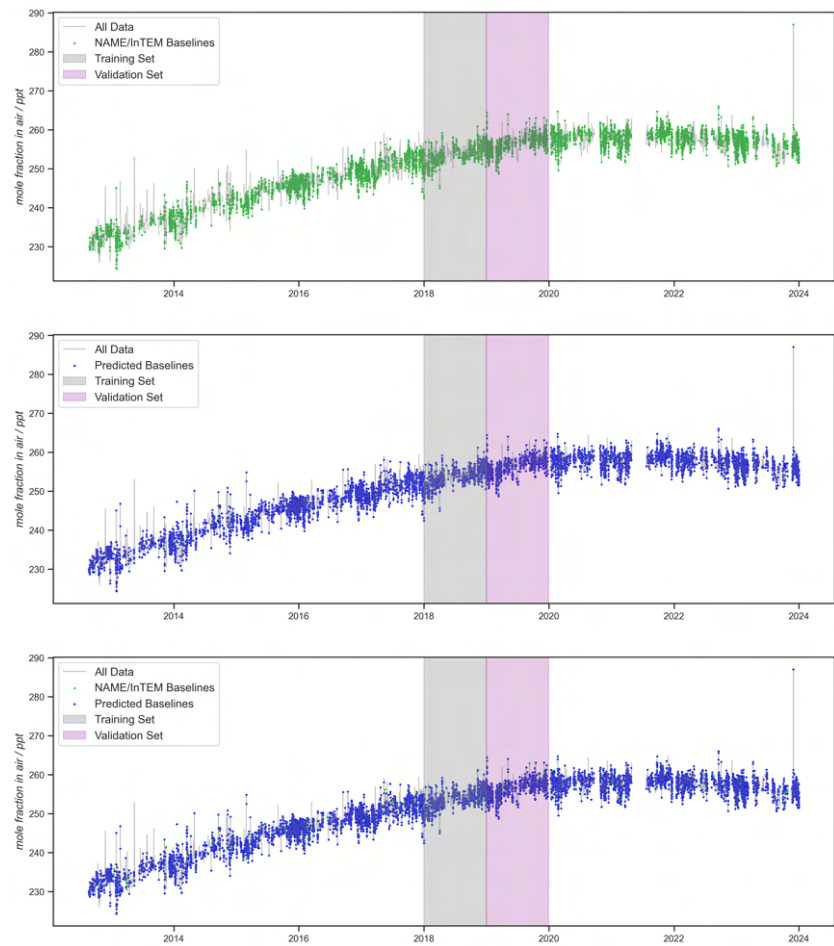

Monthly means

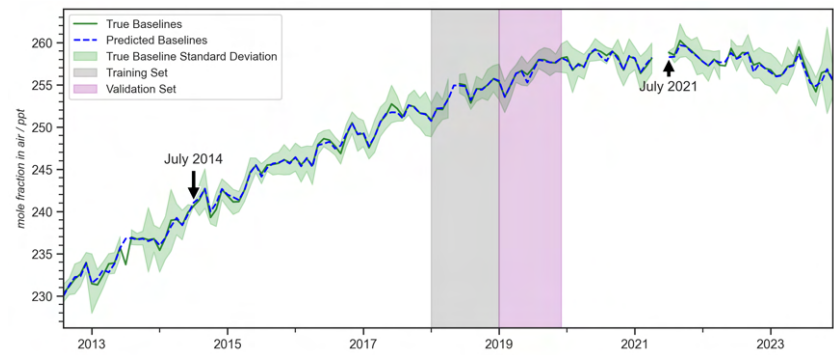

4.7.6 HFC-125

Mole fraction time series

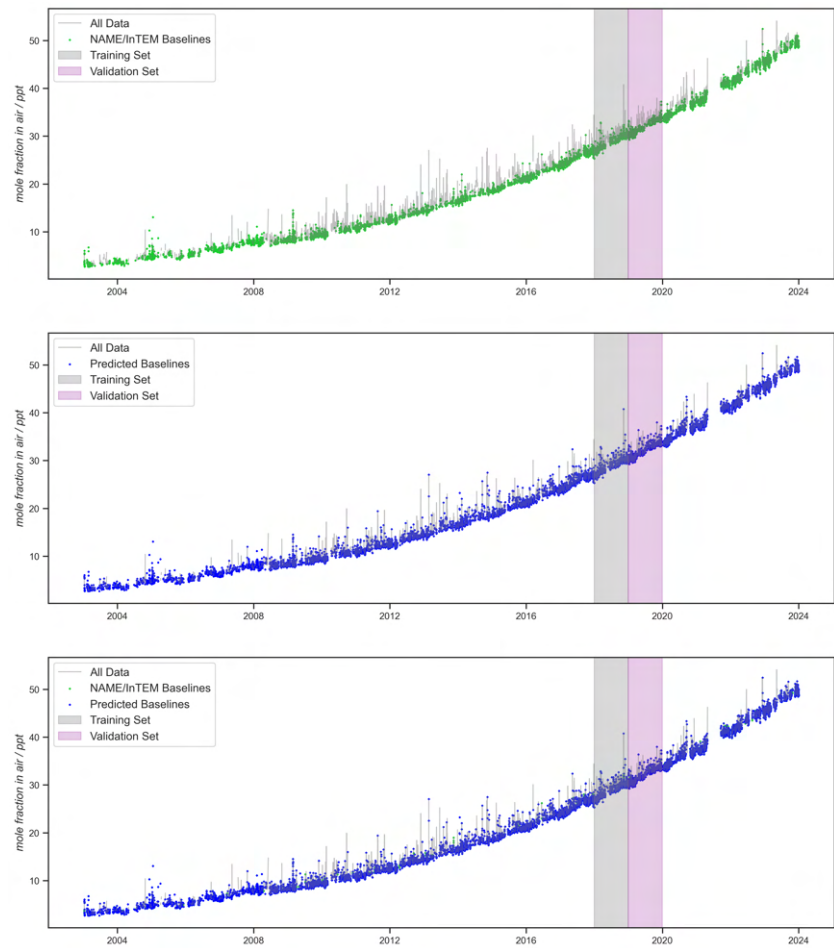

Monthly means

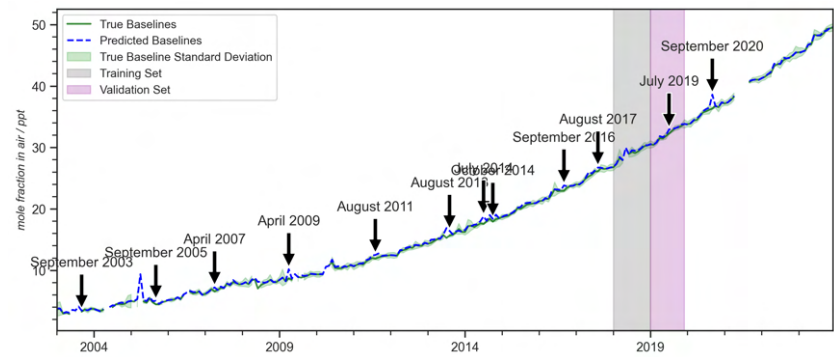

Mole fraction time series

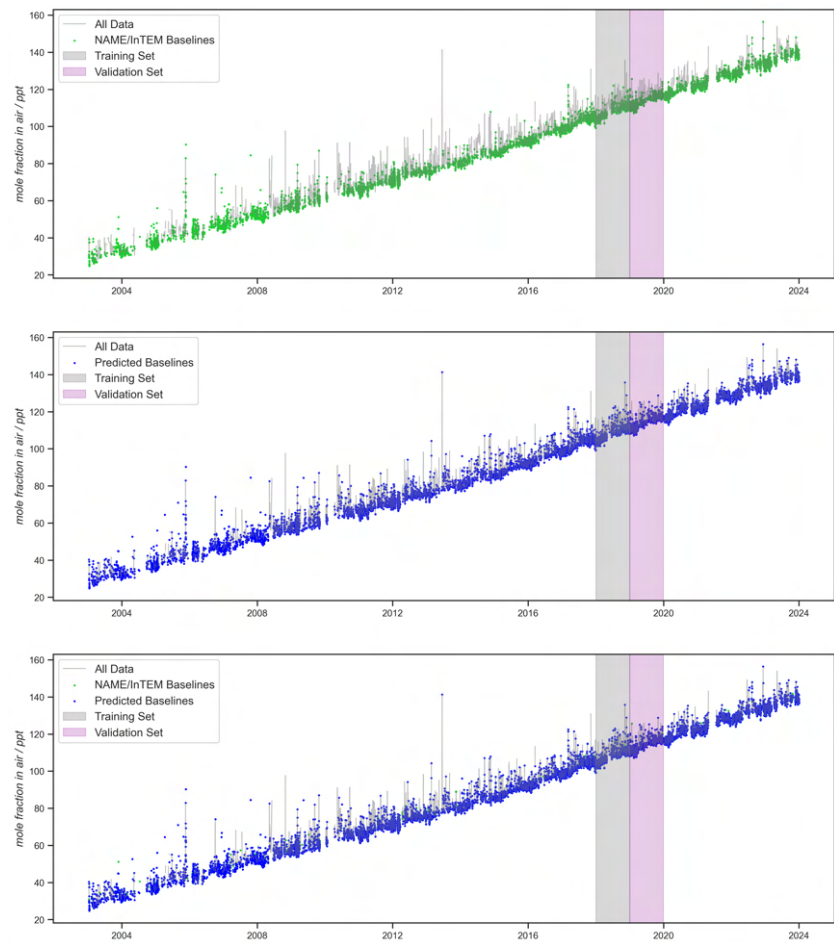

Monthly means

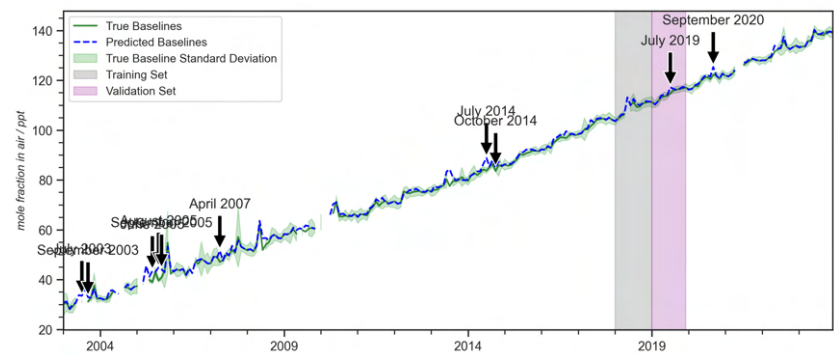

4.7.8 SF<sub>6</sub>

Mole fraction time series

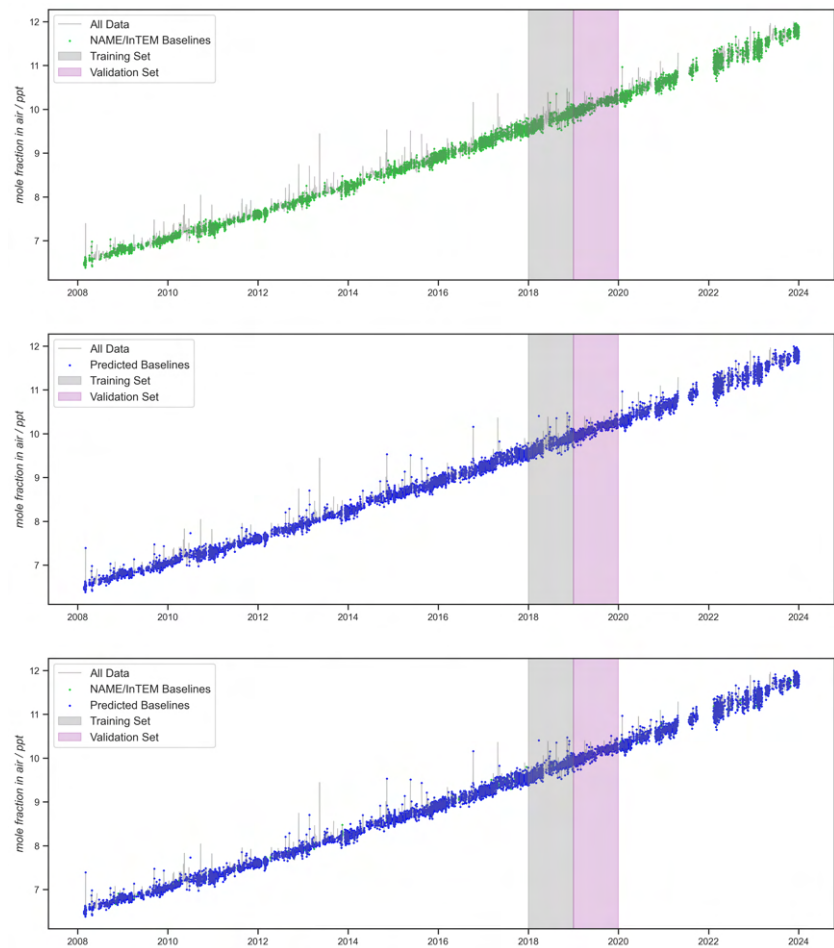

115 Monthly means

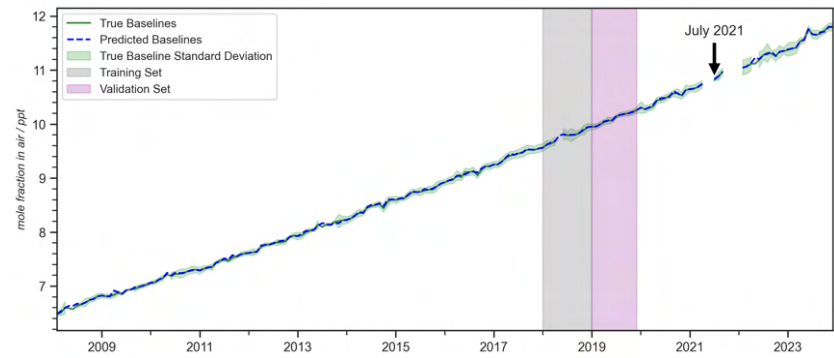

## 4.8 Mace Head, Ireland

### 4.8.1 CH<sub>4</sub>

#### Mole fraction time series

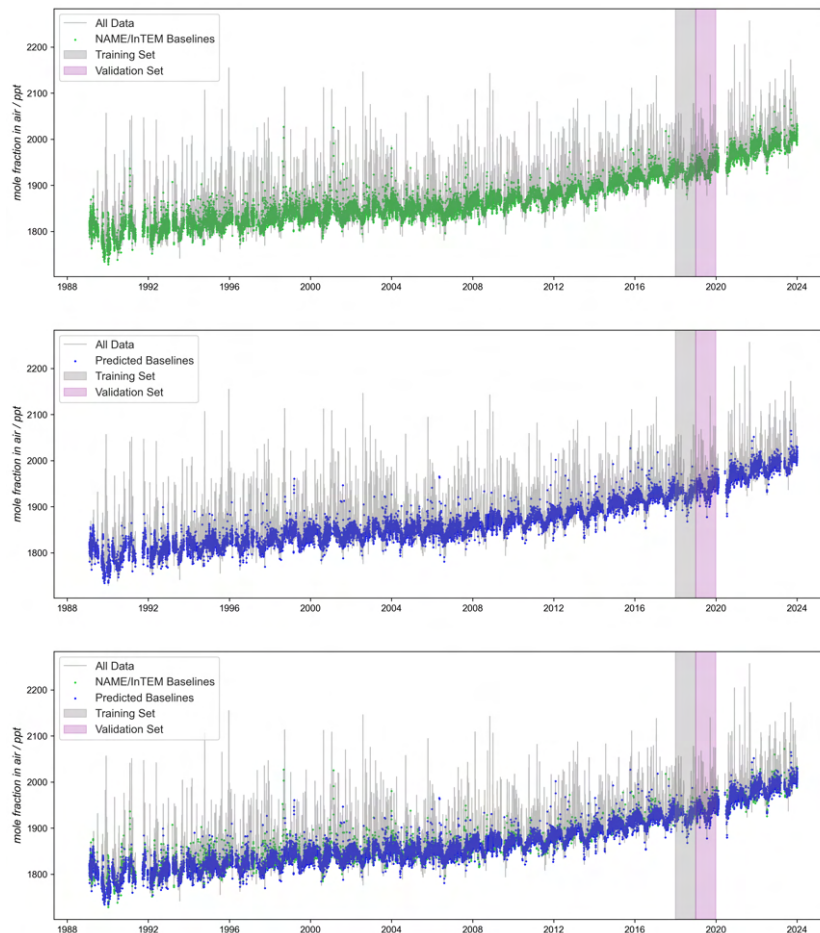

Monthly means

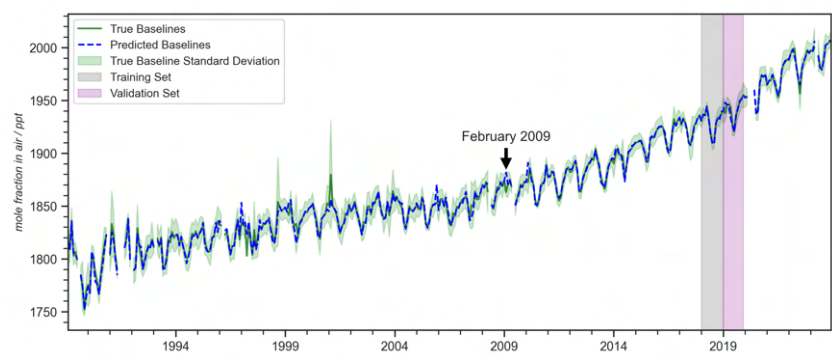



Mole fraction time series

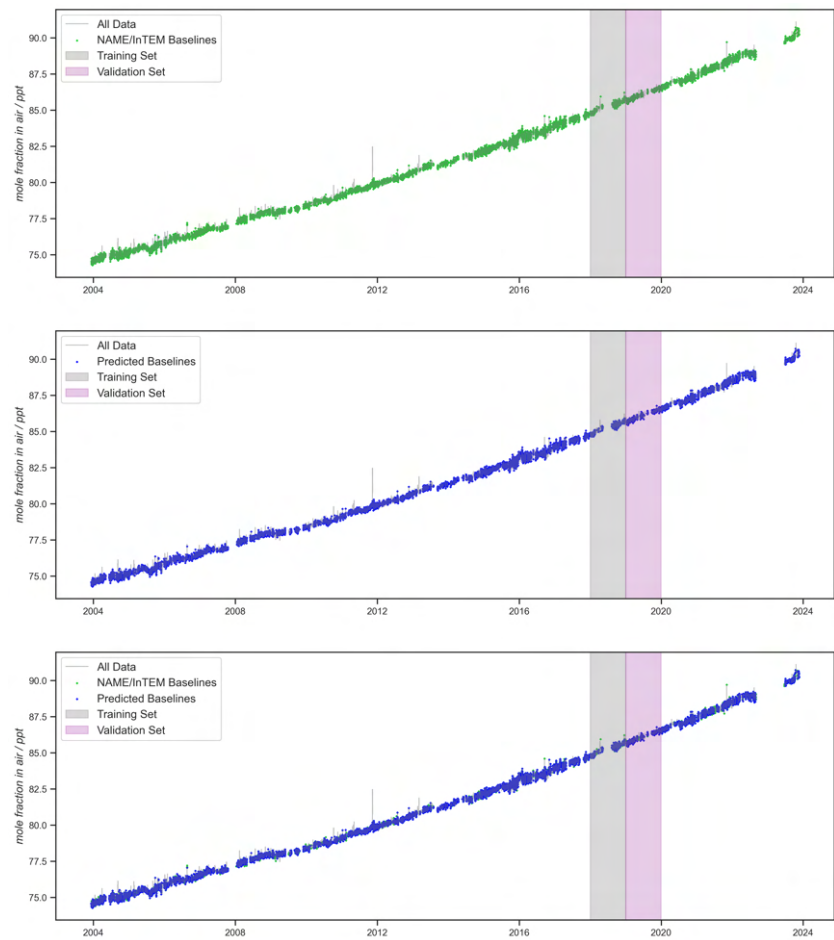

Monthly means

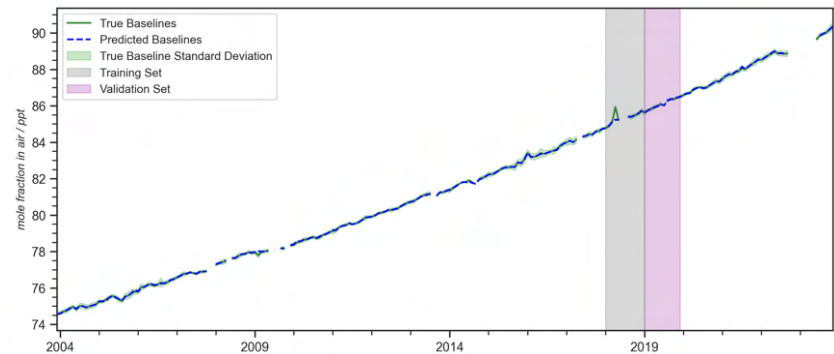

4.8.3 CFC-12

Mole fraction time series

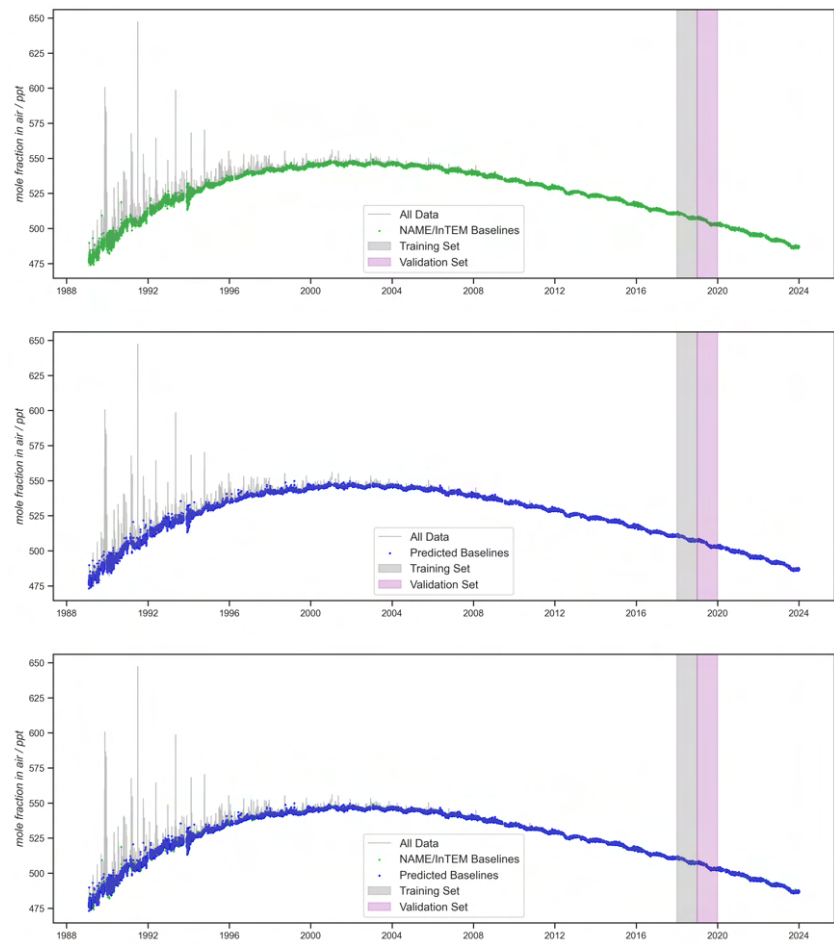

125 Monthly means

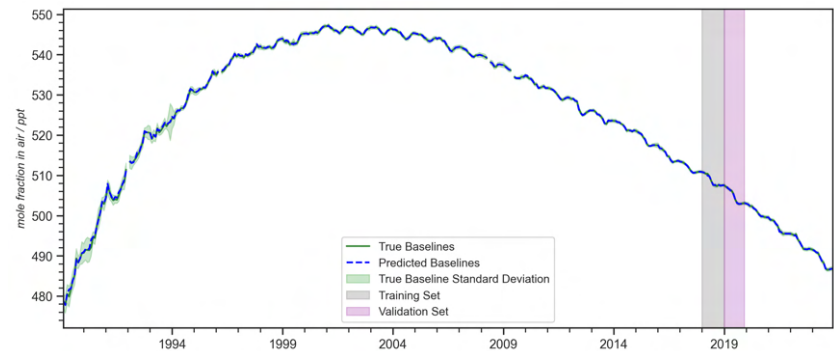

## 4.8.4 CH<sub>2</sub>Cl<sub>2</sub>

### Mole fraction time series

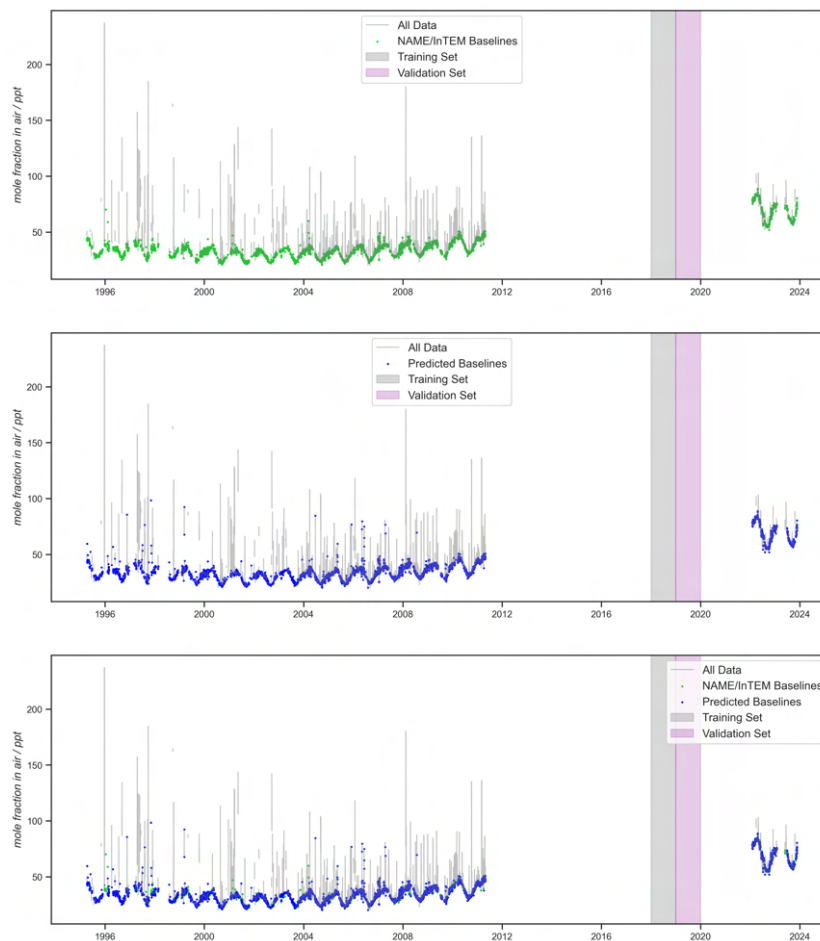

### Monthly means

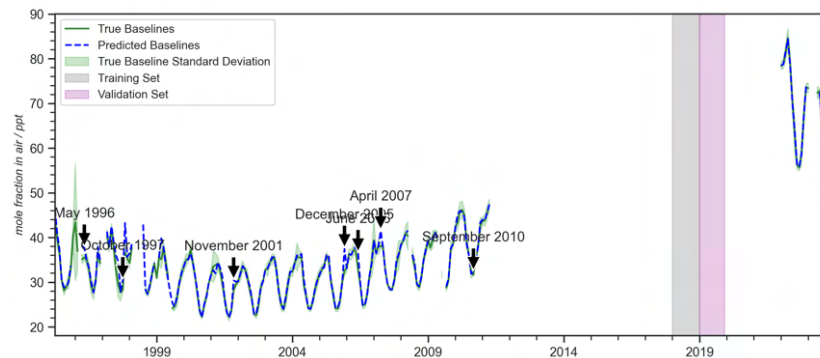

## 4.8.5 CH<sub>3</sub>Br

### 130 Mole fraction time series

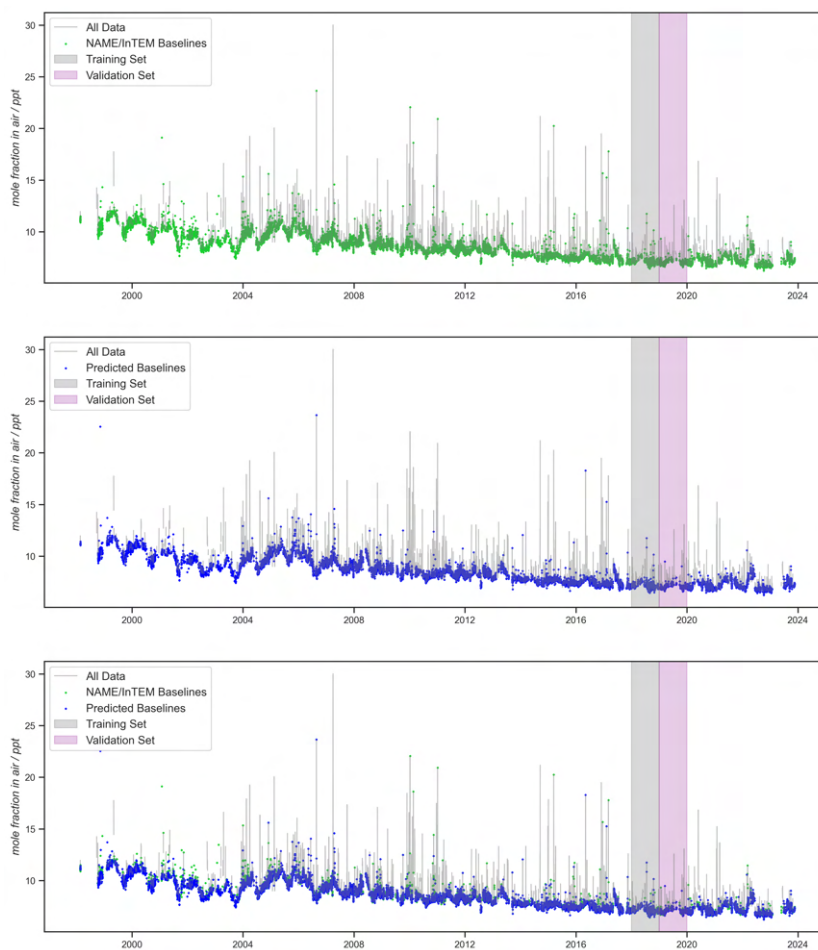

### Monthly means

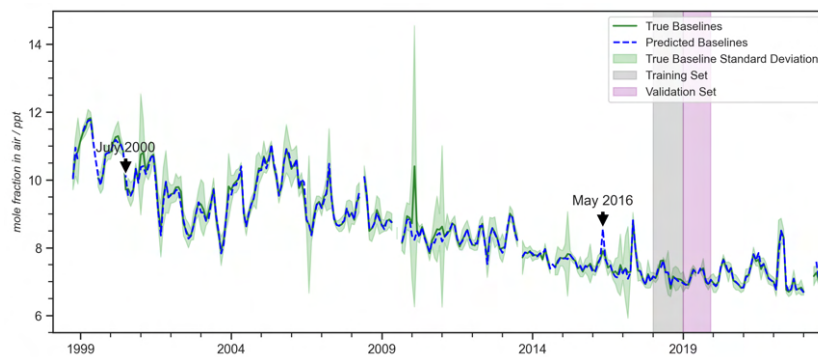

## 4.8.6 HCFC-22

### Mole fraction time series

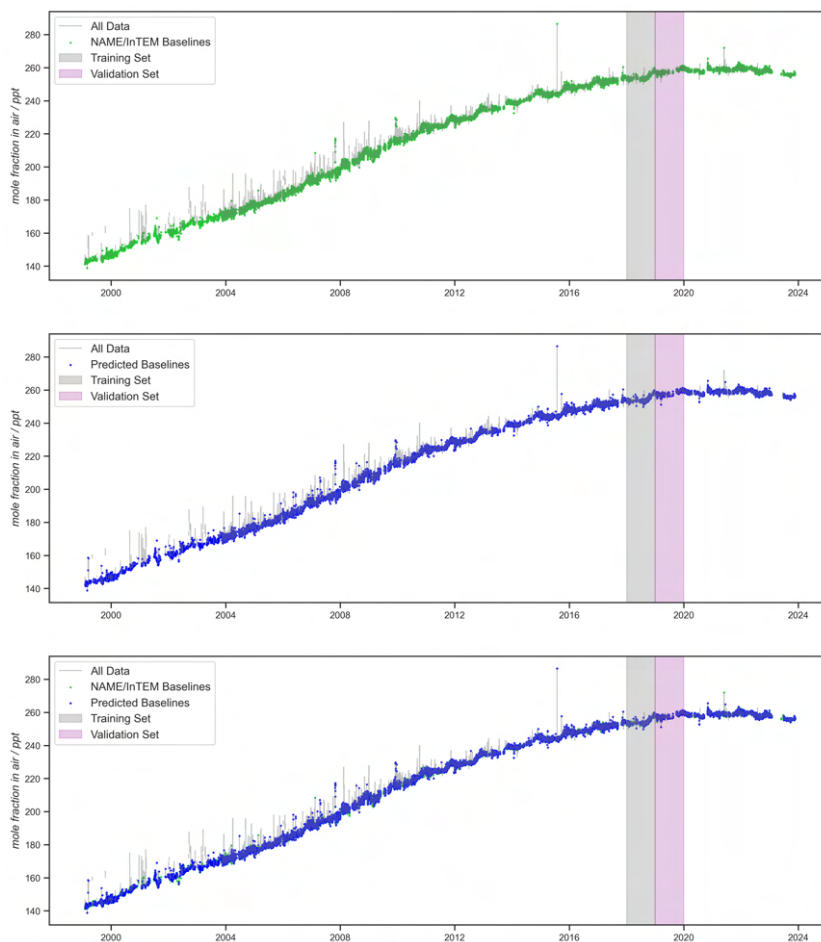

### Monthly means

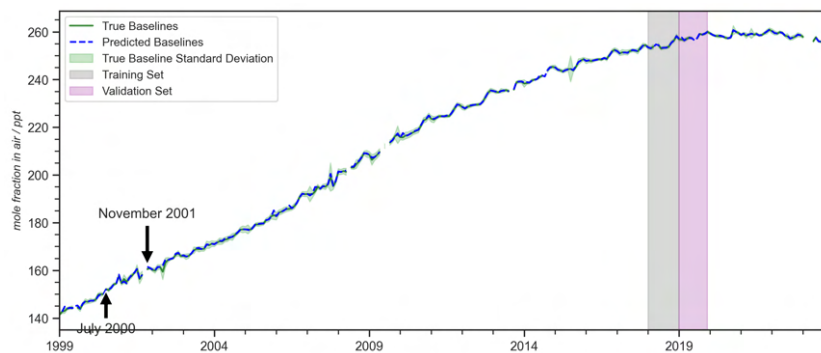

Mole fraction time series

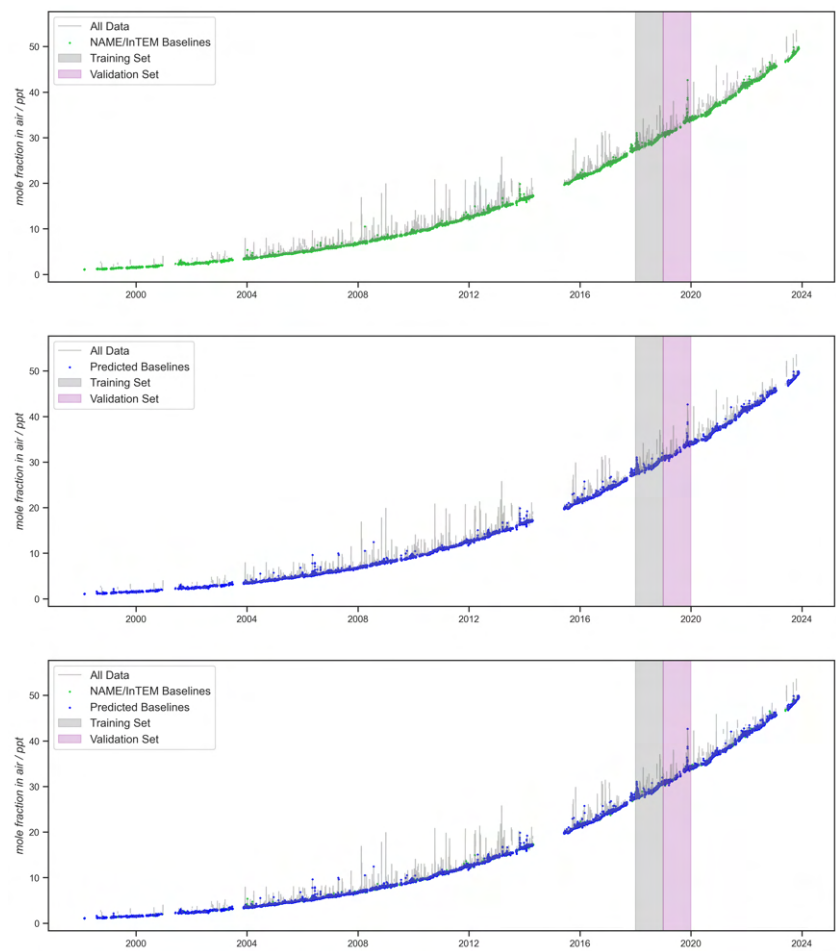

Monthly means

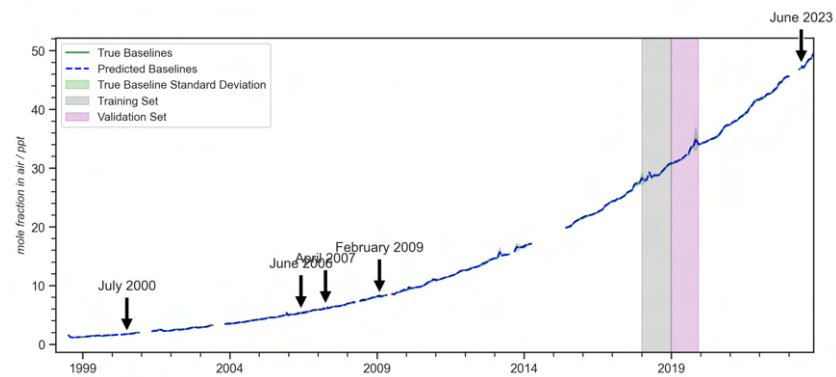

4.8.8 HFC-134a

Mole fraction time series

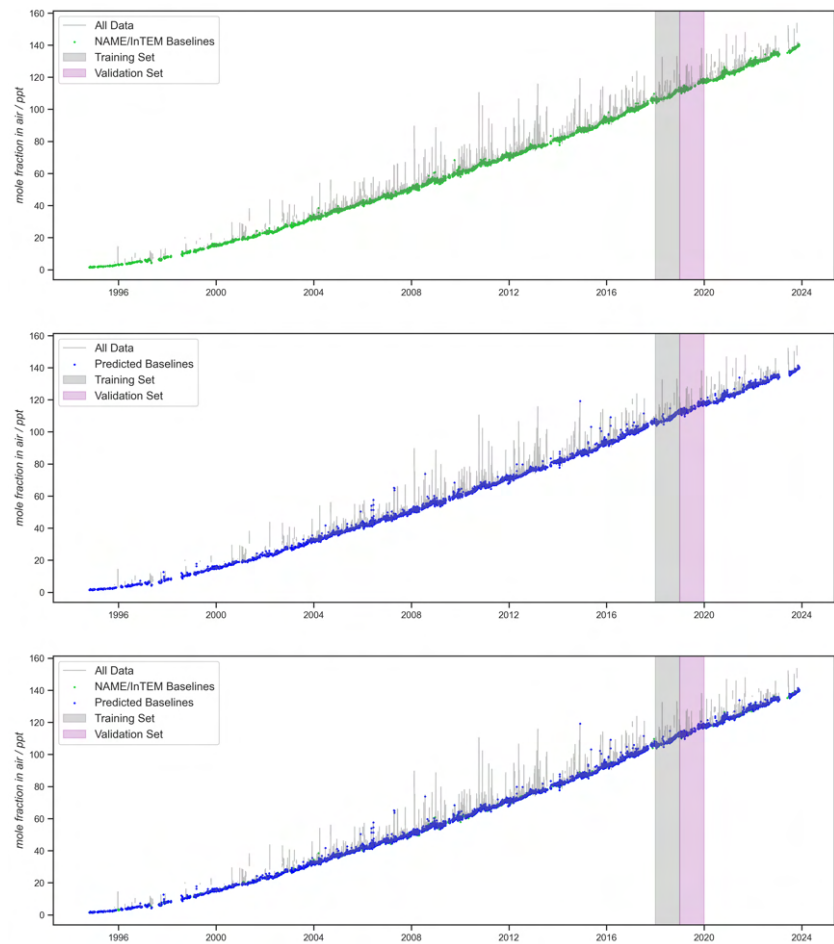

140 Monthly means

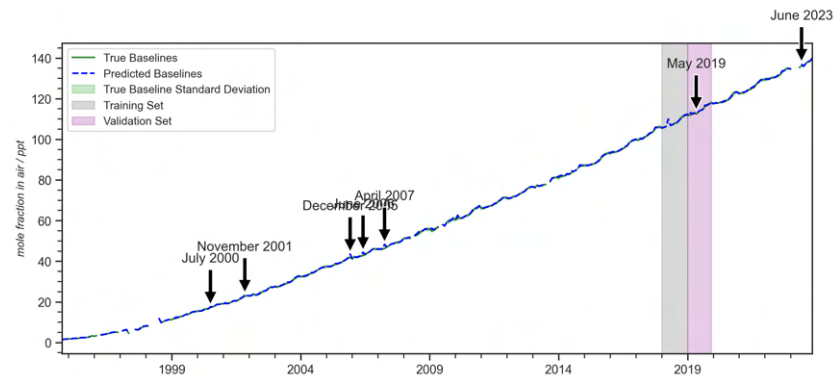

## 4.8.9 N<sub>2</sub>O

### Mole fraction time series

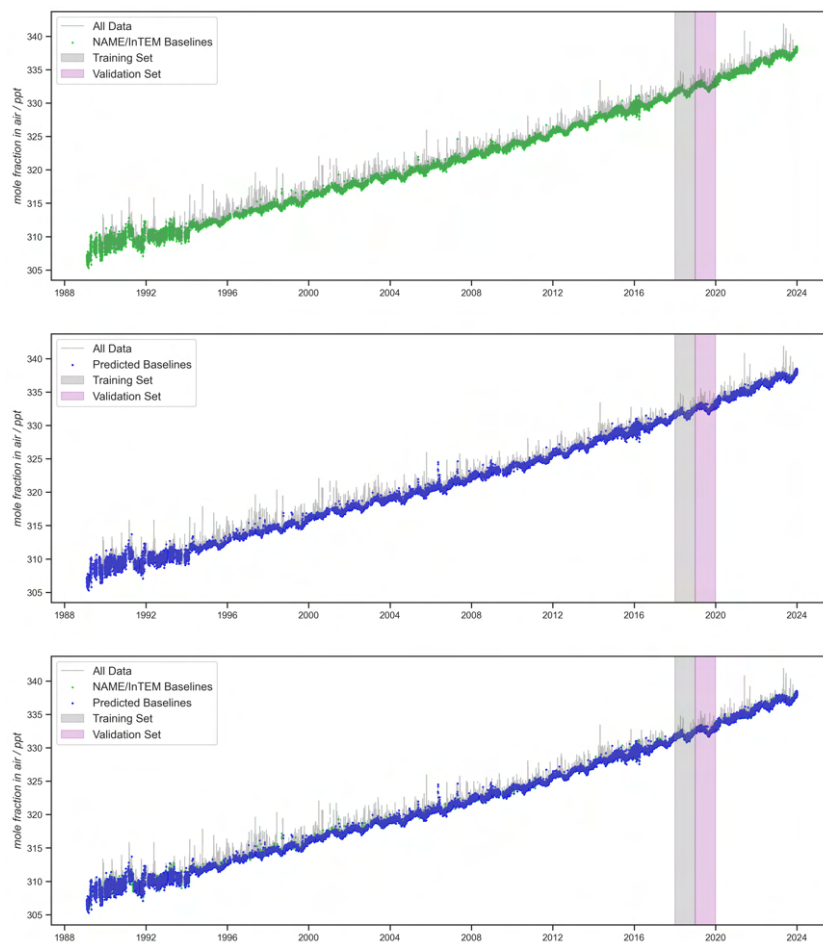

### Monthly means

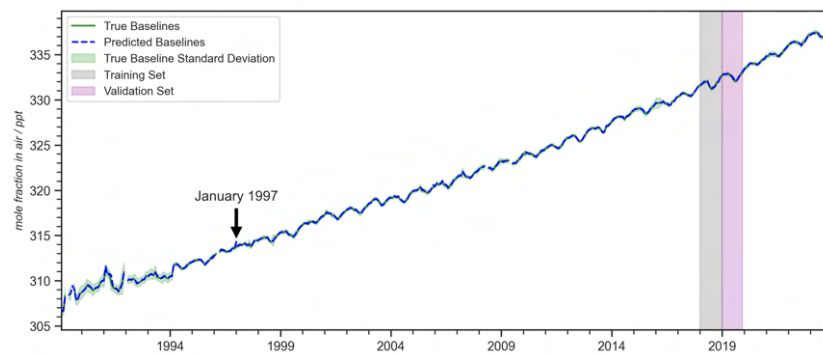



## 4.8.10 SF<sub>6</sub>

### 145 Mole fraction time series

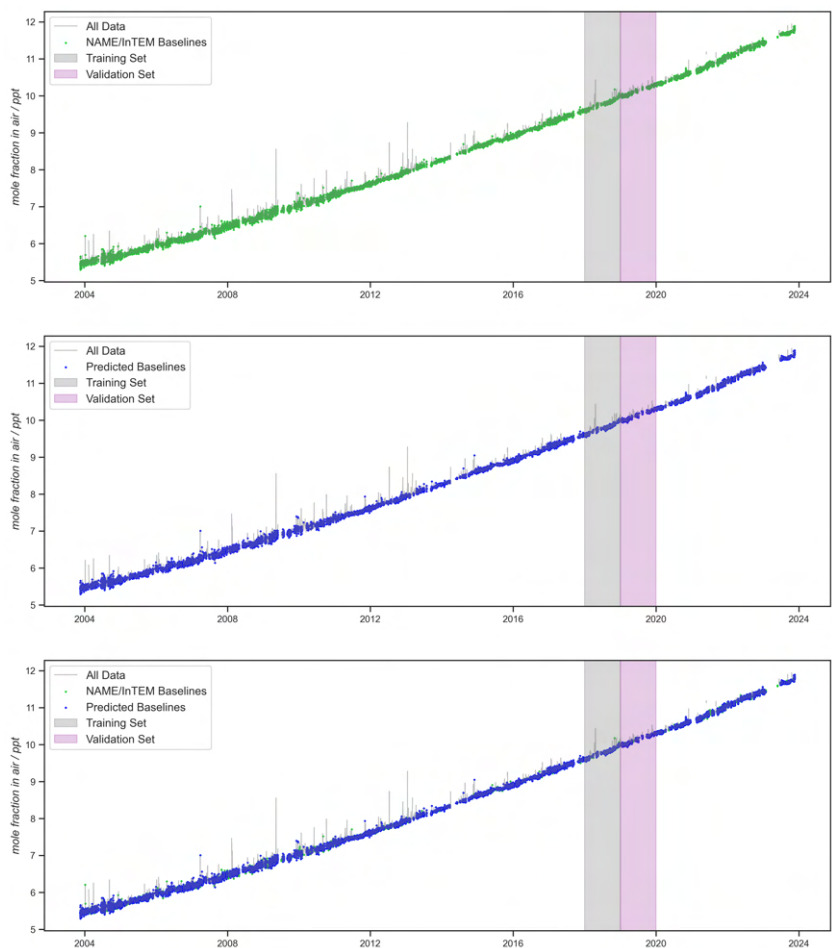

### Monthly means

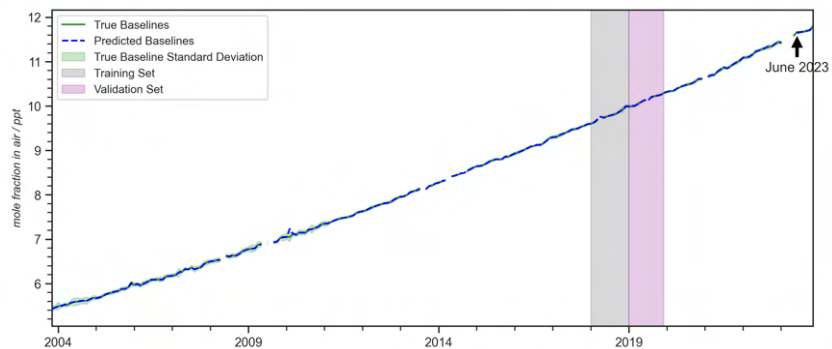

## 4.9 Ragged Point, Barbados

### 4.9.1 CH<sub>4</sub>

Mole fraction time series

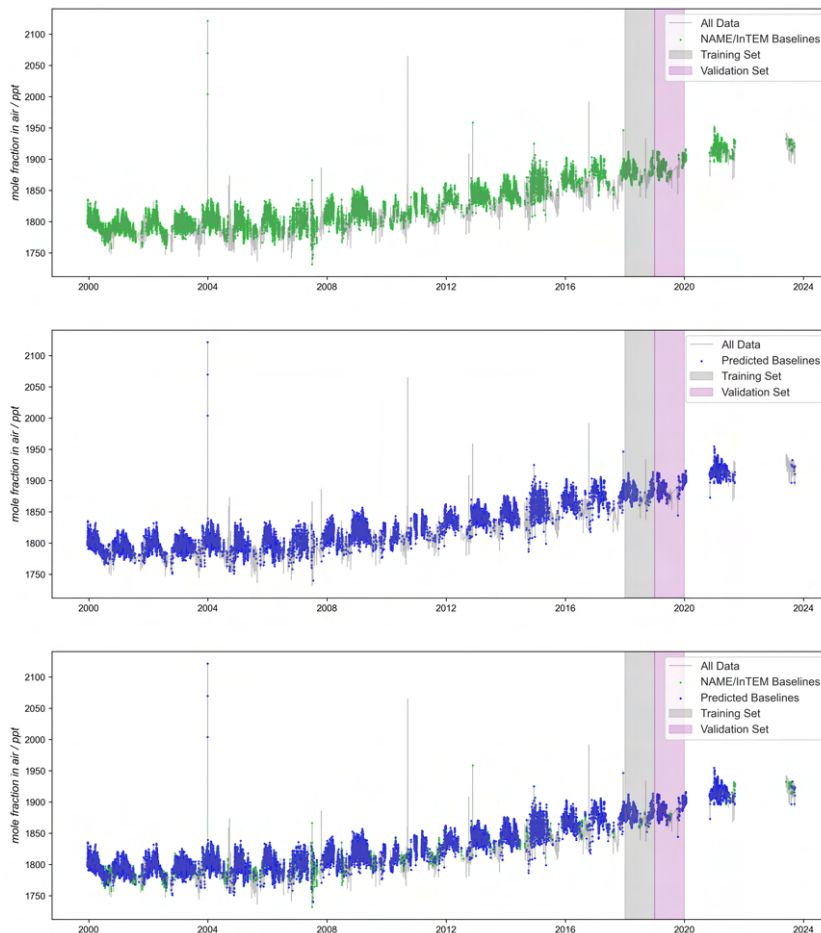

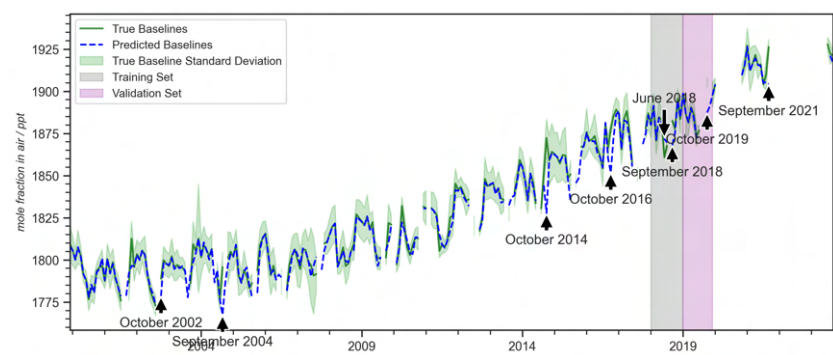

## 4.9.2 CF<sub>4</sub>

### Mole fraction time series

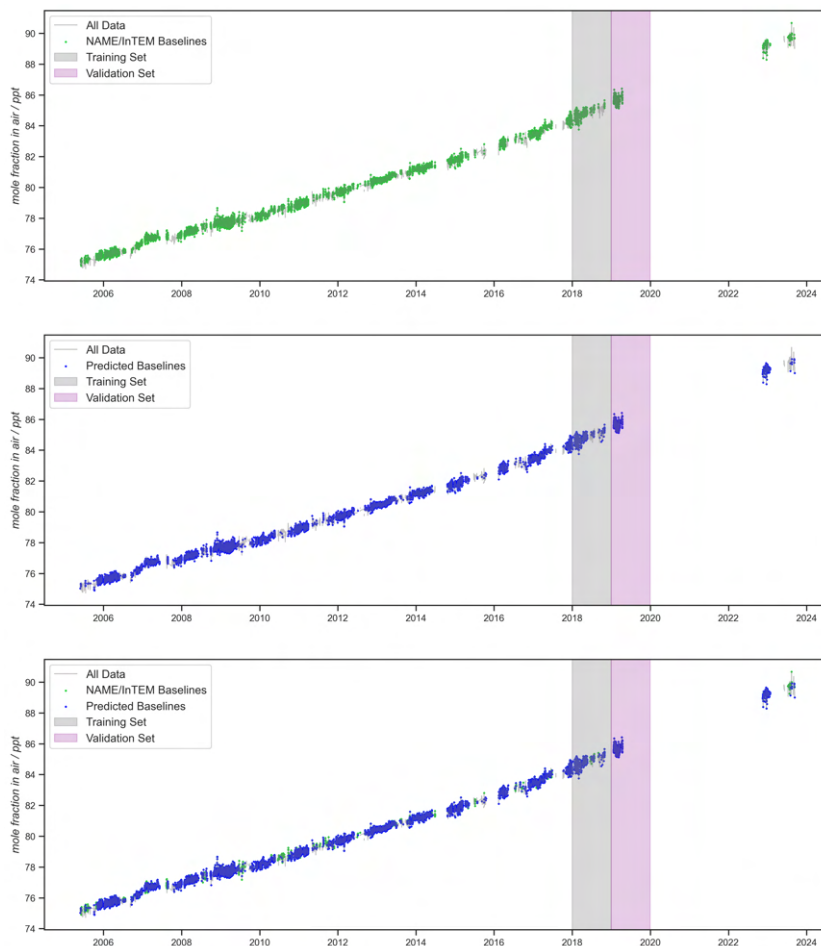

### Monthly means

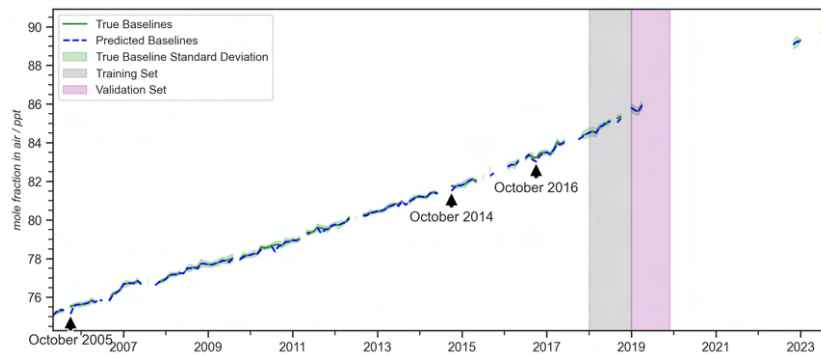

4.9.3 CFC-12

155 Mole fraction time series

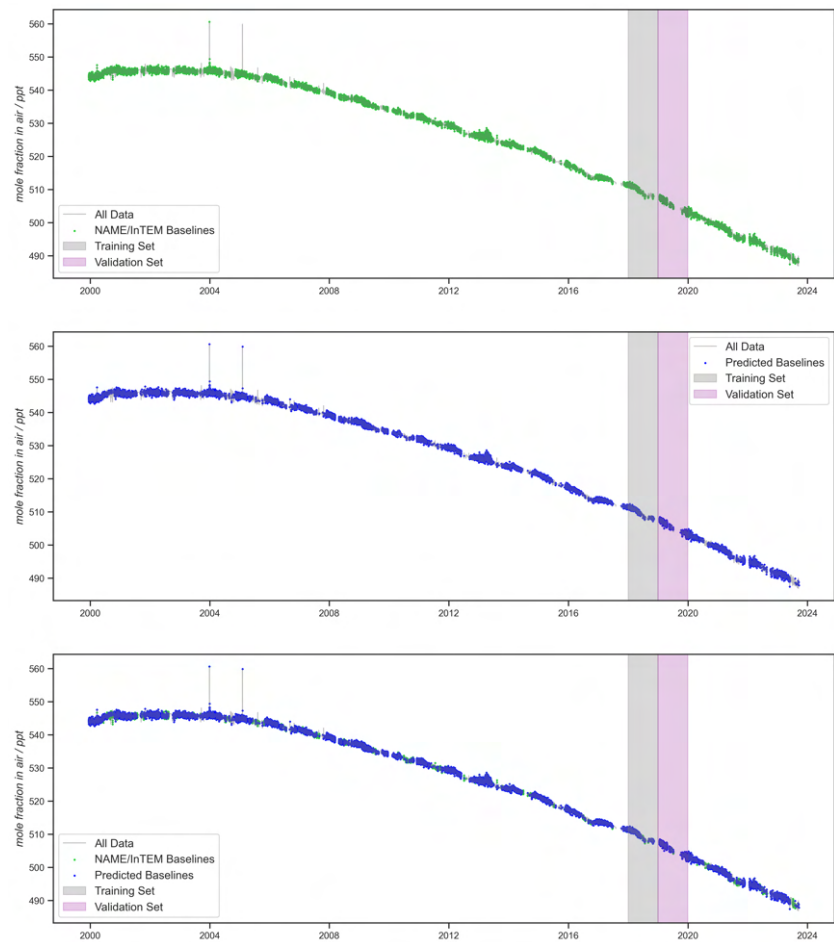

Monthly means

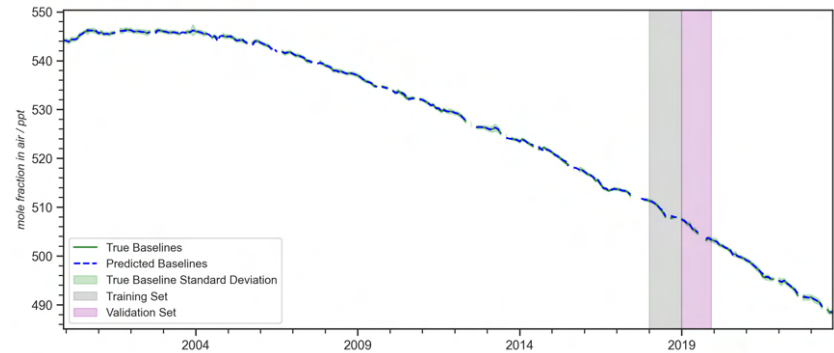

4.9.4 CH<sub>2</sub>Cl<sub>2</sub>

Mole fraction time series

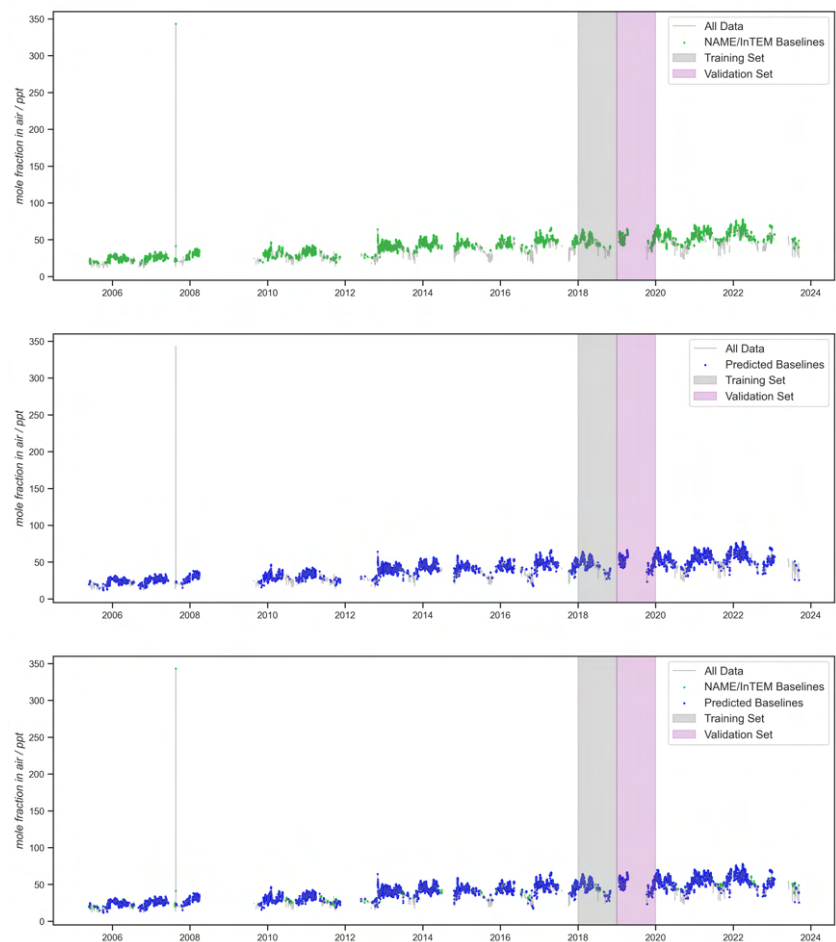

Monthly means

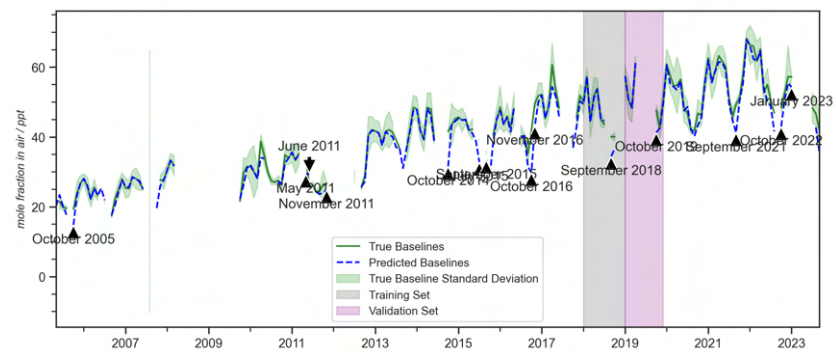

Mole fraction time series

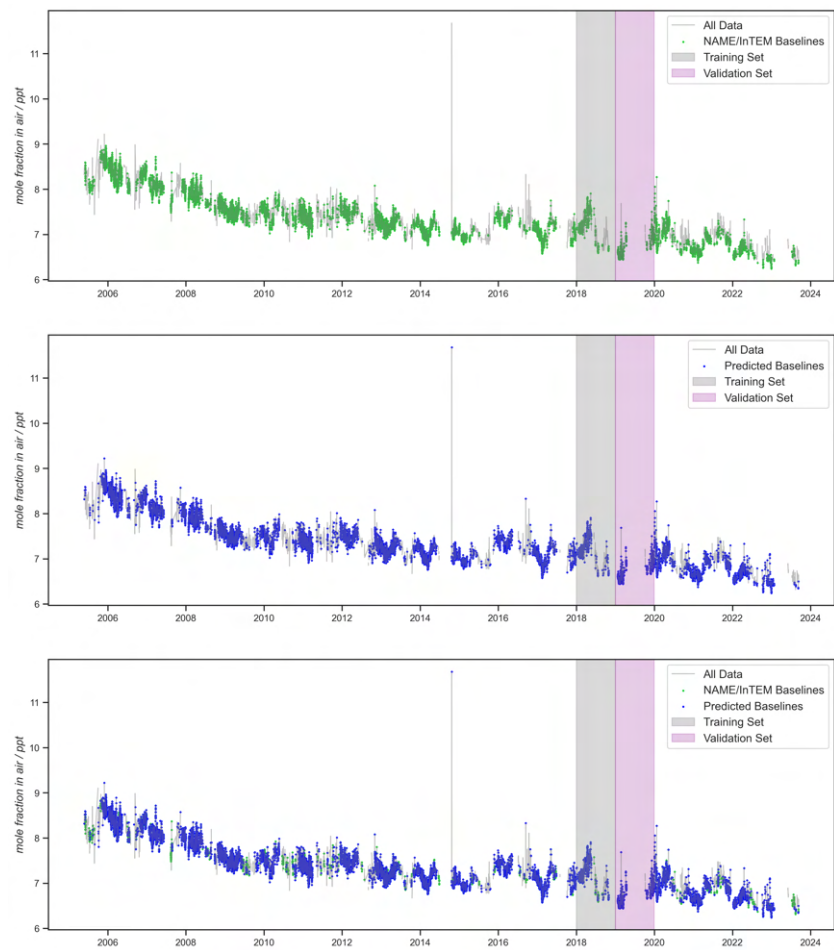

Monthly means

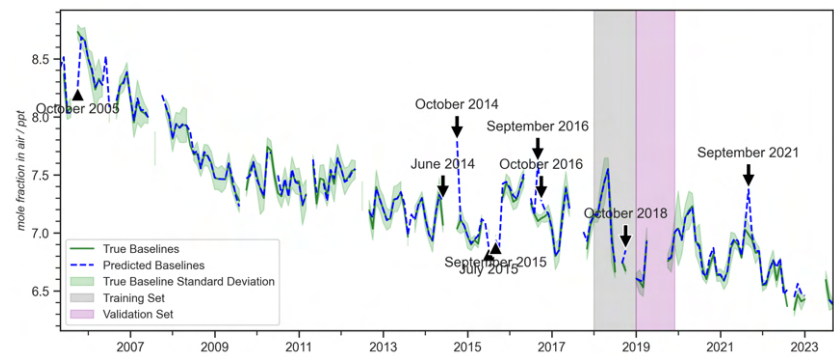

4.9.6 HCFC-22

Mole fraction time series

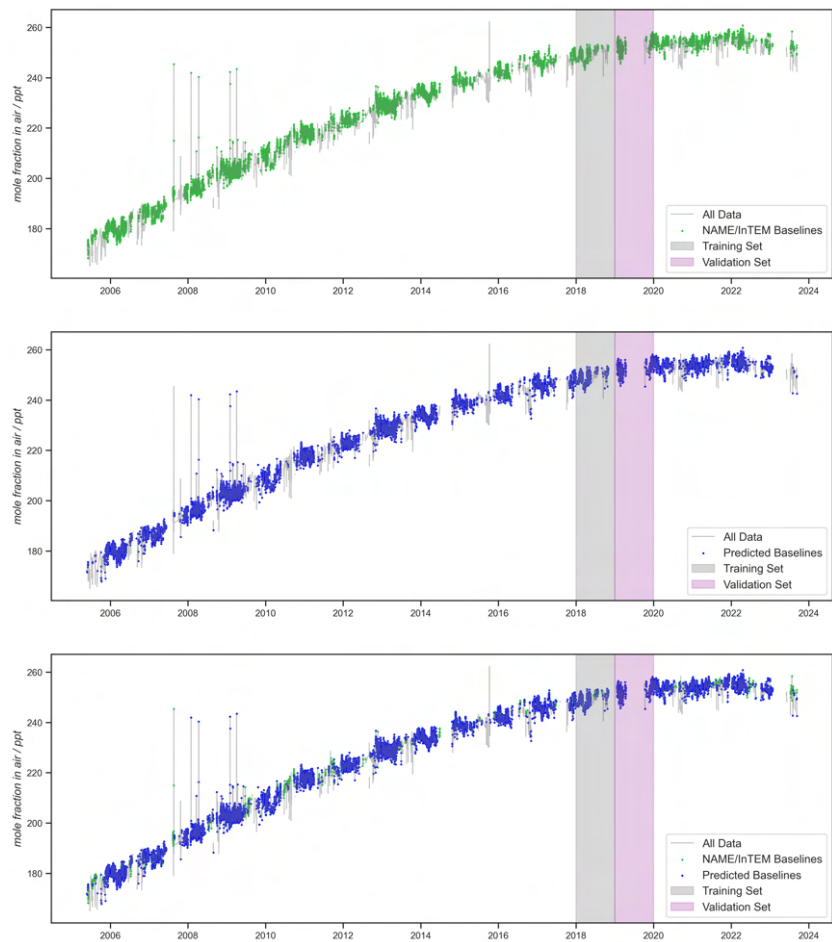

165 Monthly means

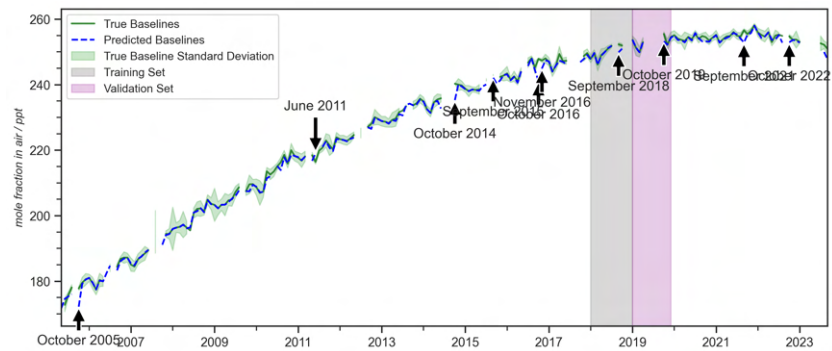



4.9.7 HFC-125

Mole fraction time series

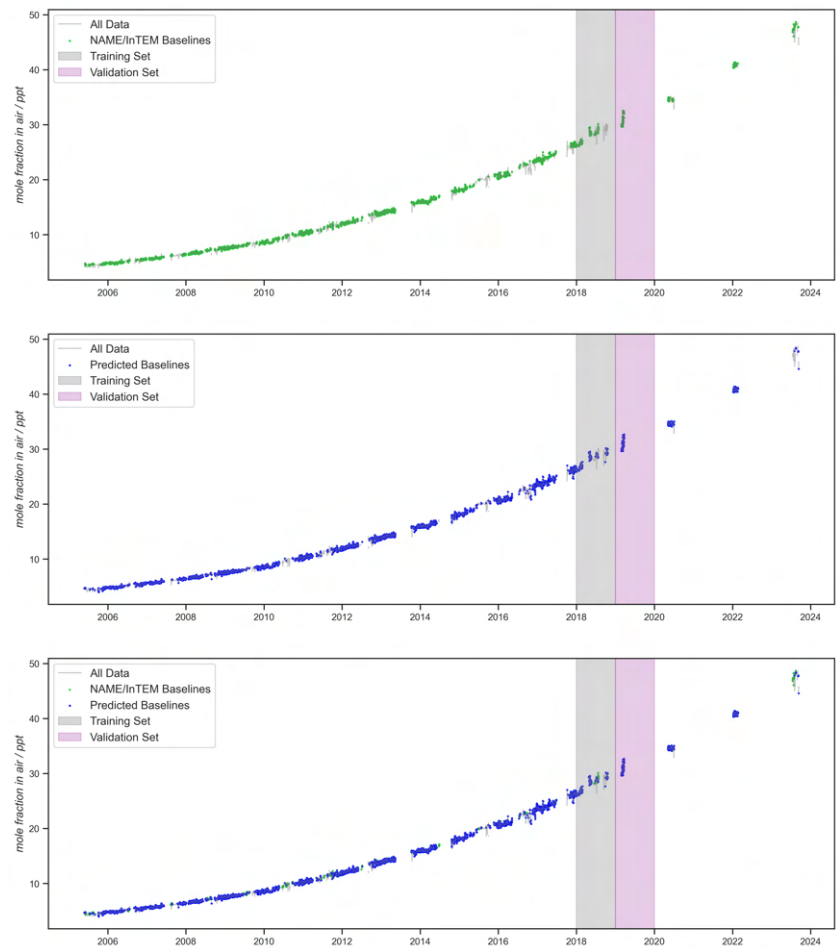

Monthly means

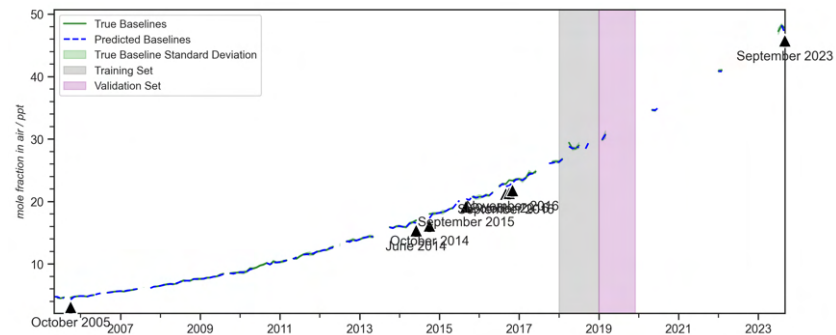

4.9.8 HFC-134a

170 Mole fraction time series

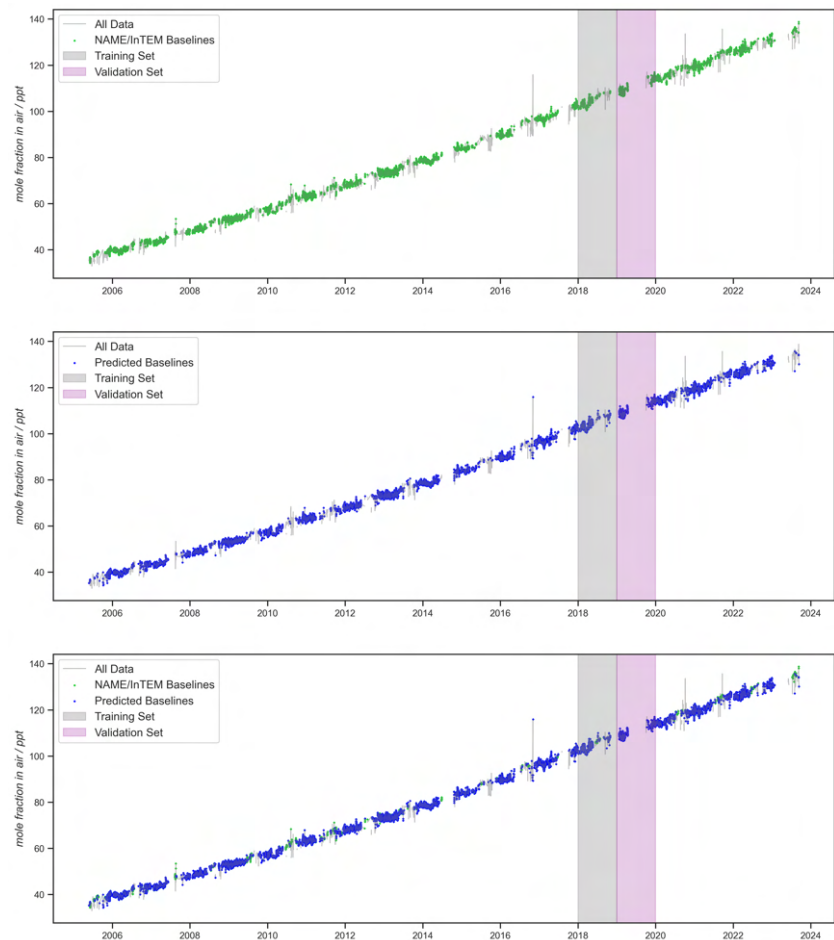

Monthly means

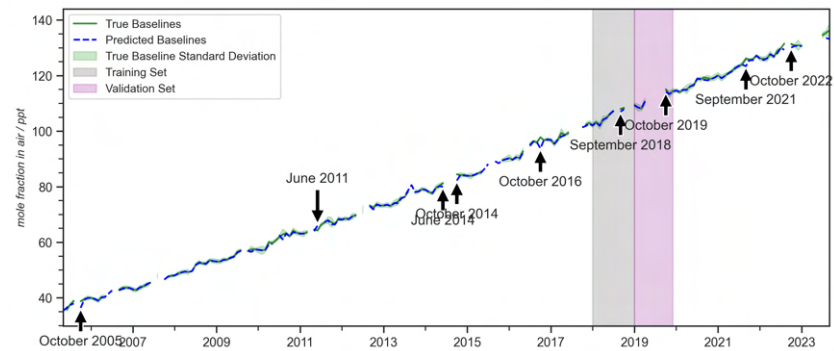

4.9.9 N<sub>2</sub>O

Mole fraction time series

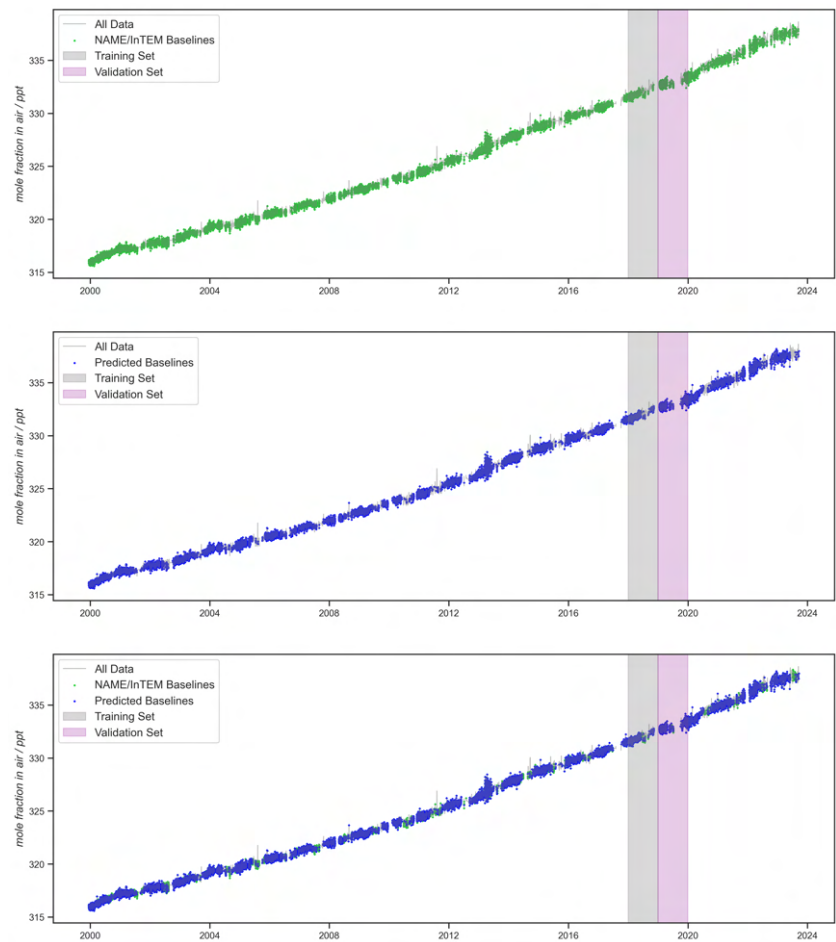

Monthly means

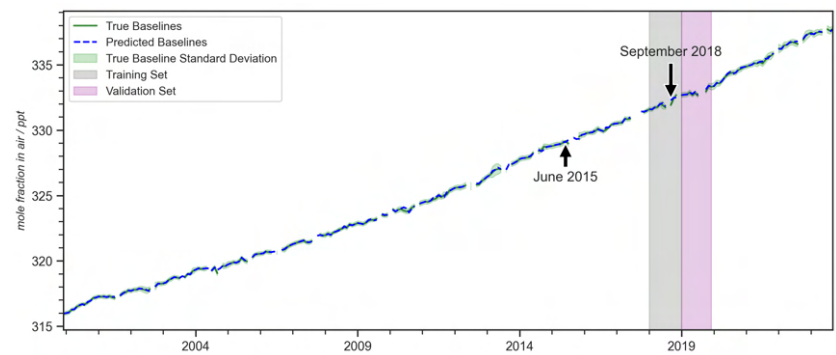

Mole fraction time series

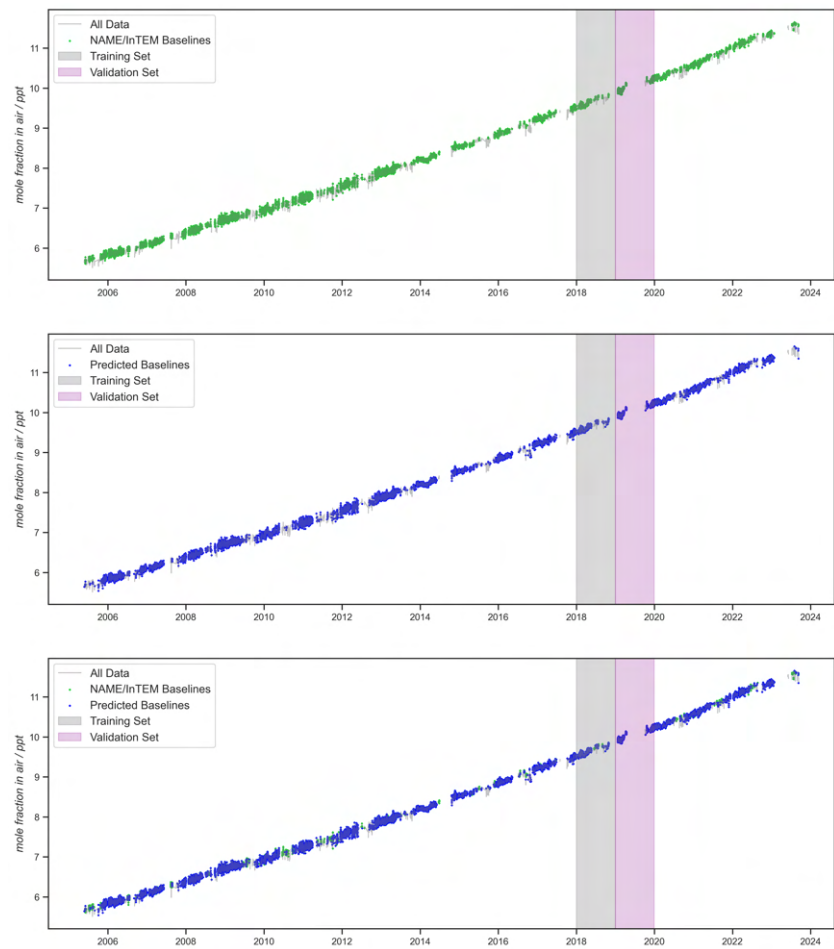

Monthly means

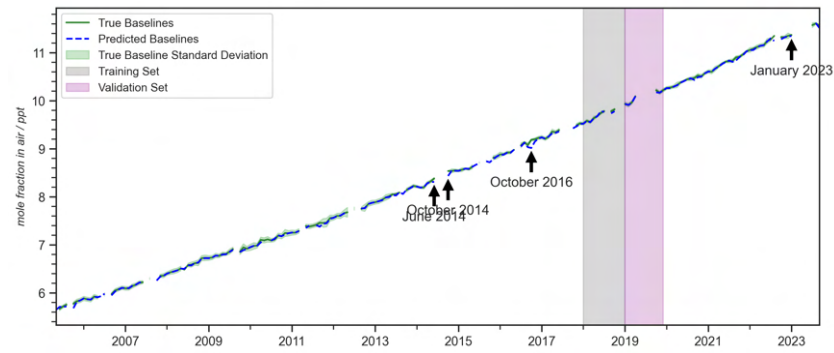

4.10 Cape Matatula, American Samoa

4.10.1 CH<sub>4</sub>

180 Mole fraction time series

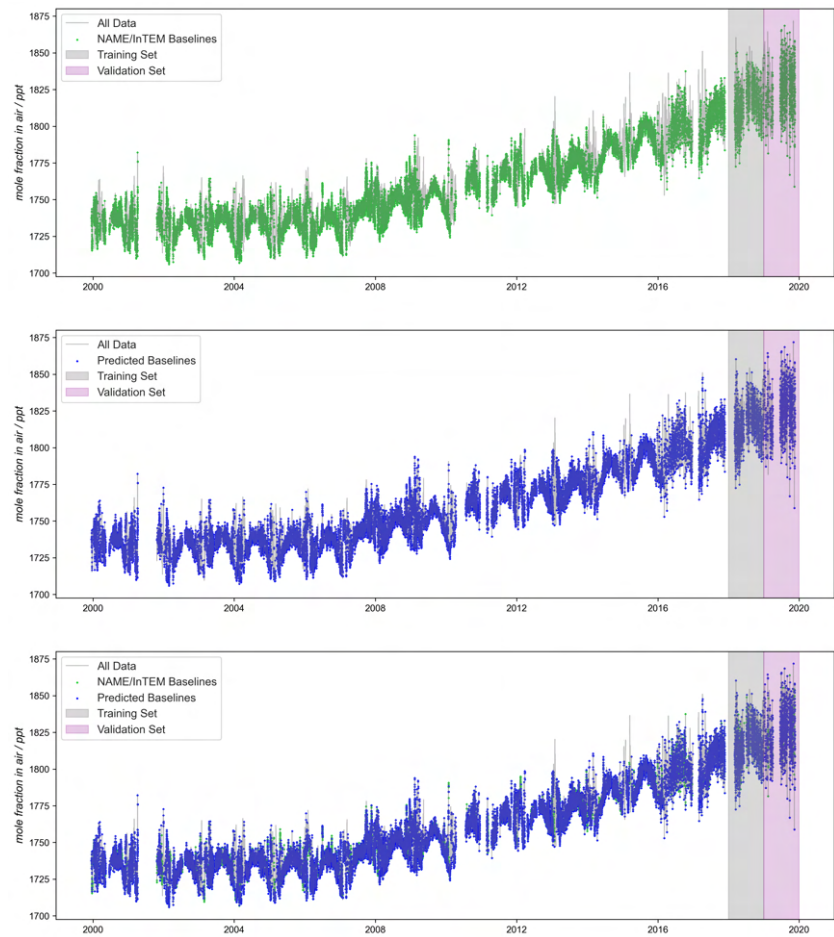

Monthly means

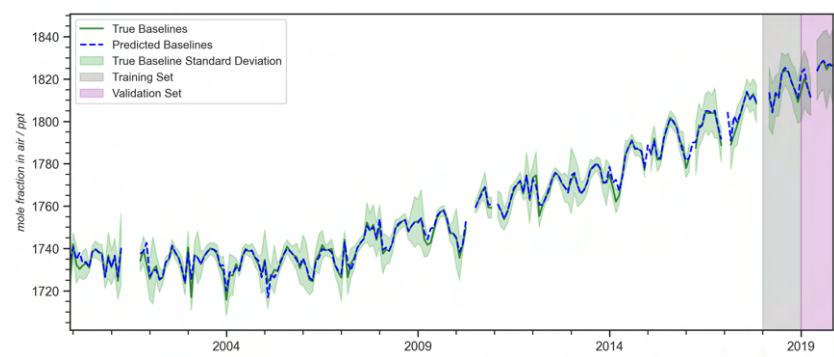

4.10.2 CF<sub>4</sub>

Mole fraction time series

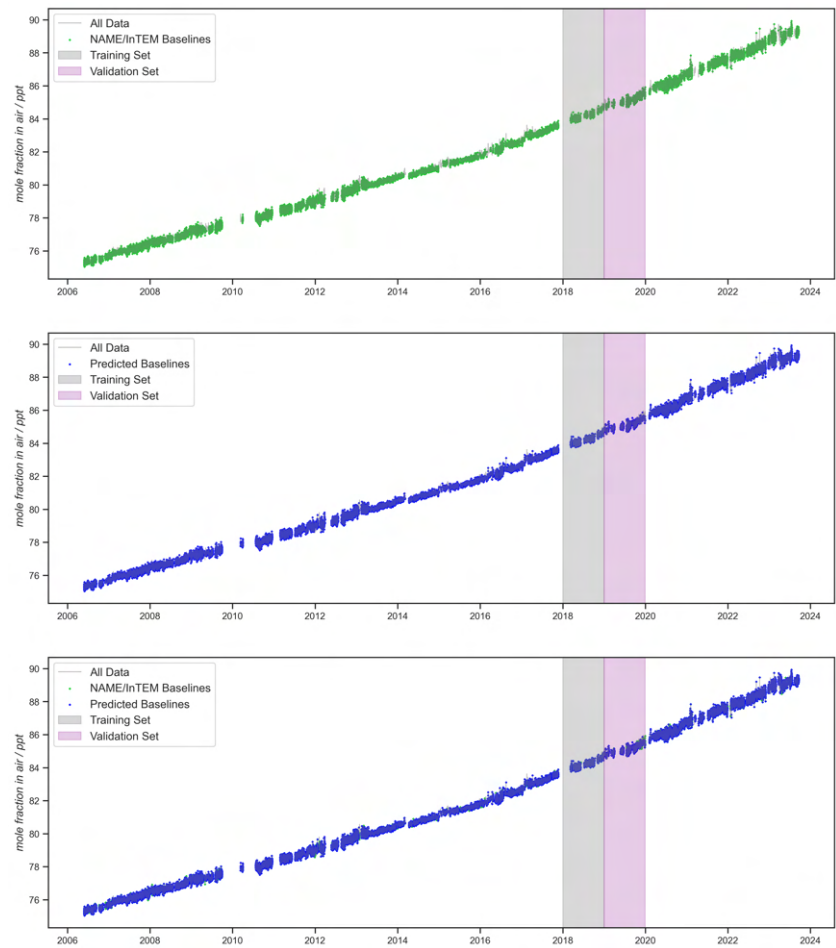

Monthly means

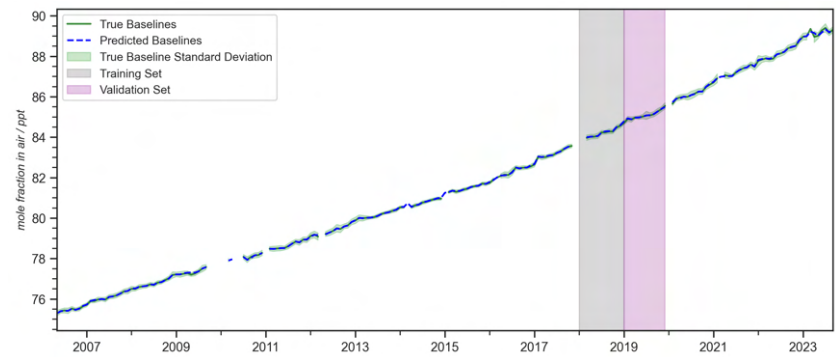

Mole fraction time series

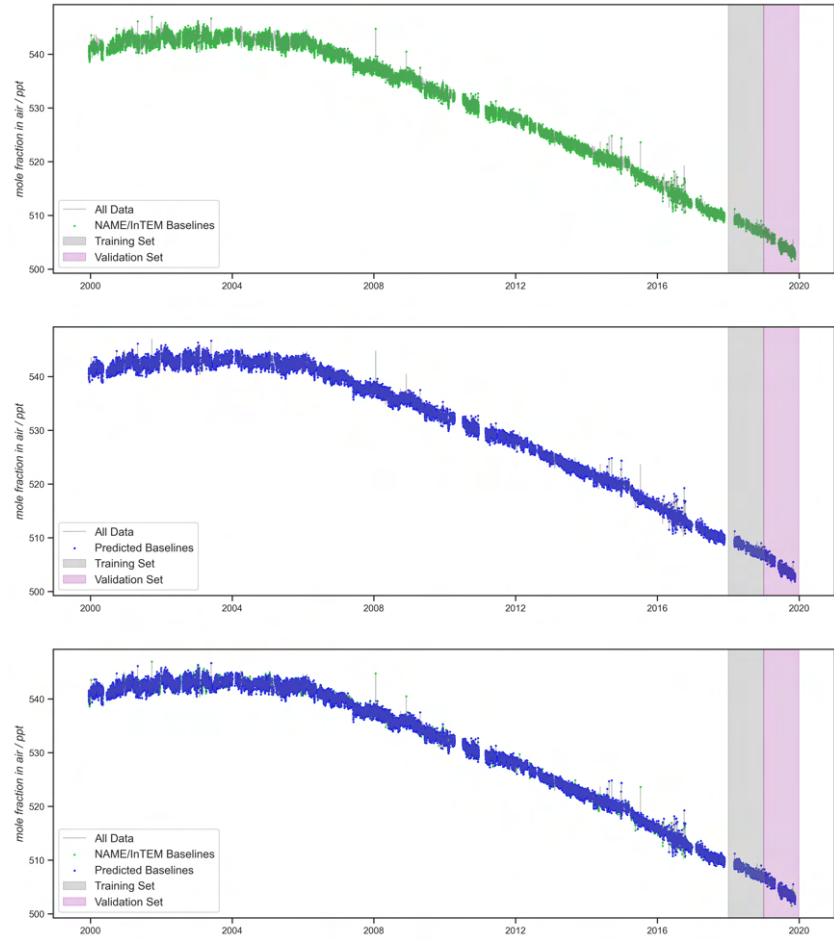

Monthly means

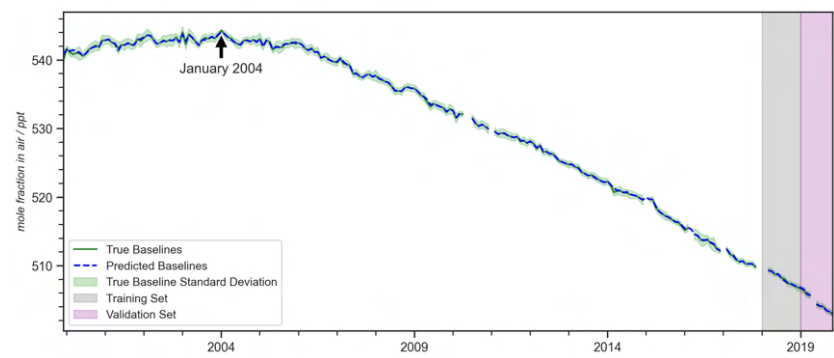



4.10.4 CH<sub>2</sub>Cl<sub>2</sub>

Mole fraction time series

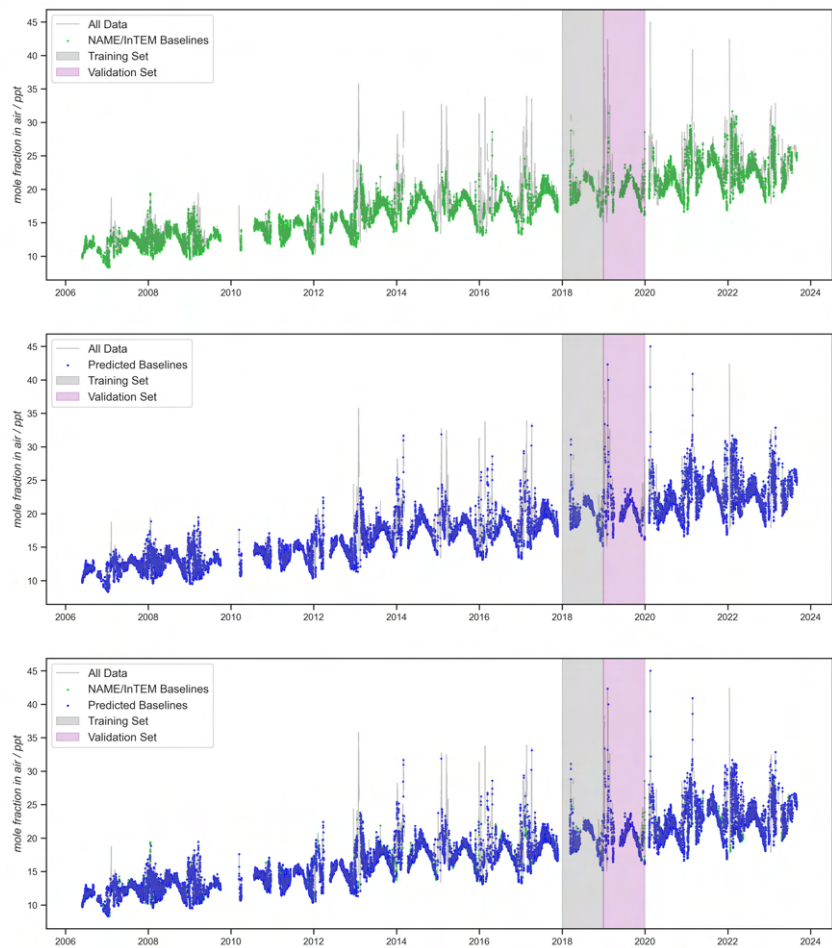

190 Monthly means

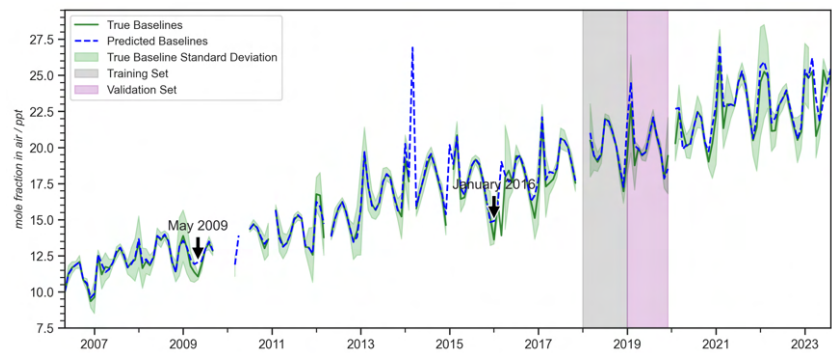

## 4.10.5 CH<sub>3</sub>Br

### Mole fraction time series

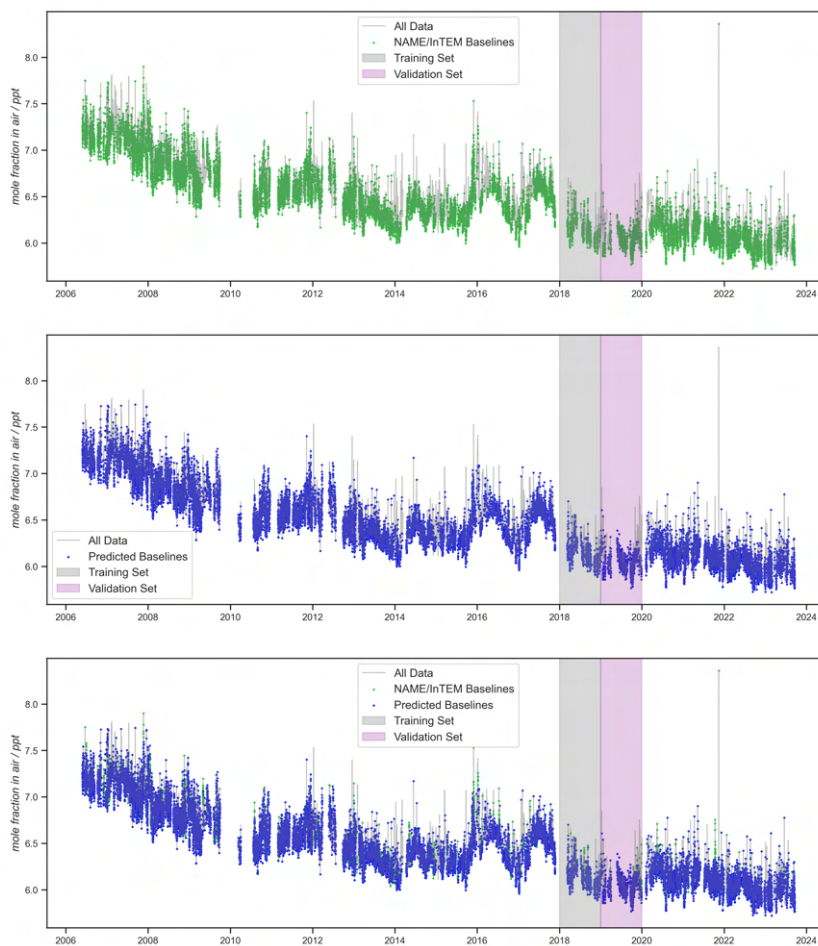

### Monthly means

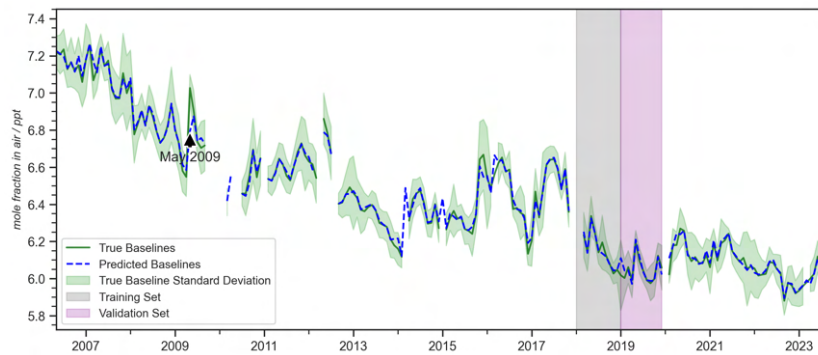

4.10.6 HCFC-22

195 Mole fraction time series

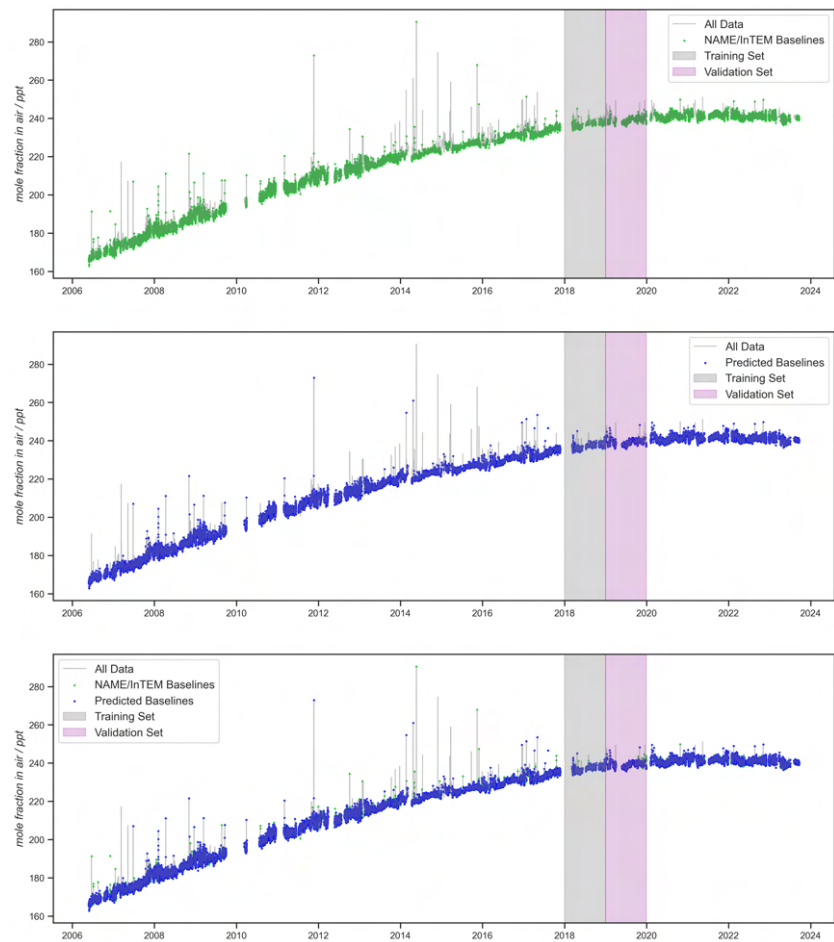

Monthly means

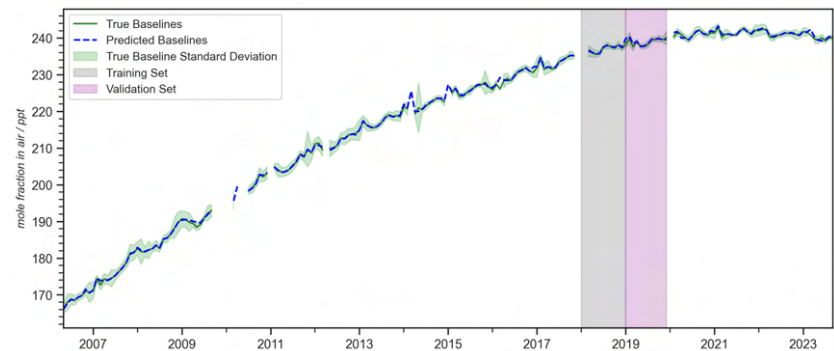

4.10.7 HFC-125

Mole fraction time series

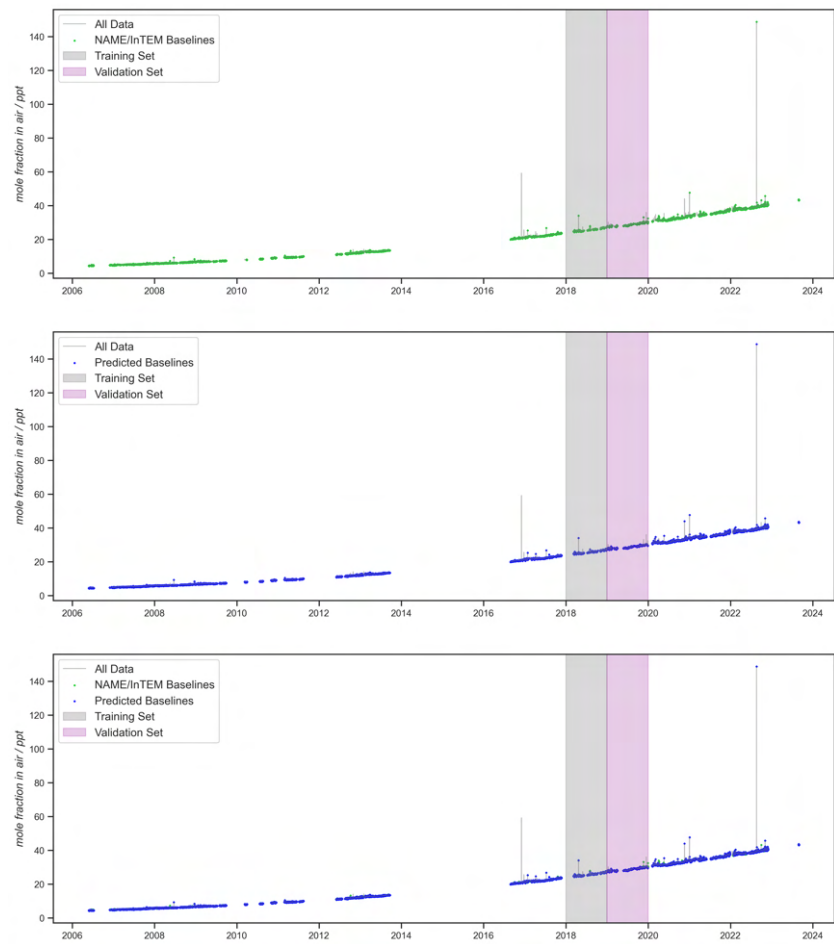

Monthly means

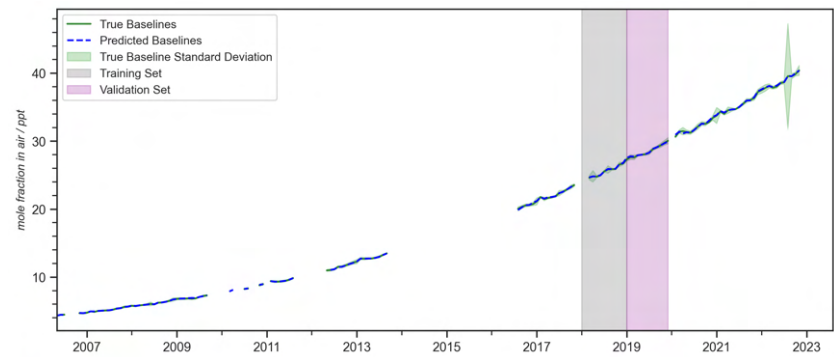

Mole fraction time series

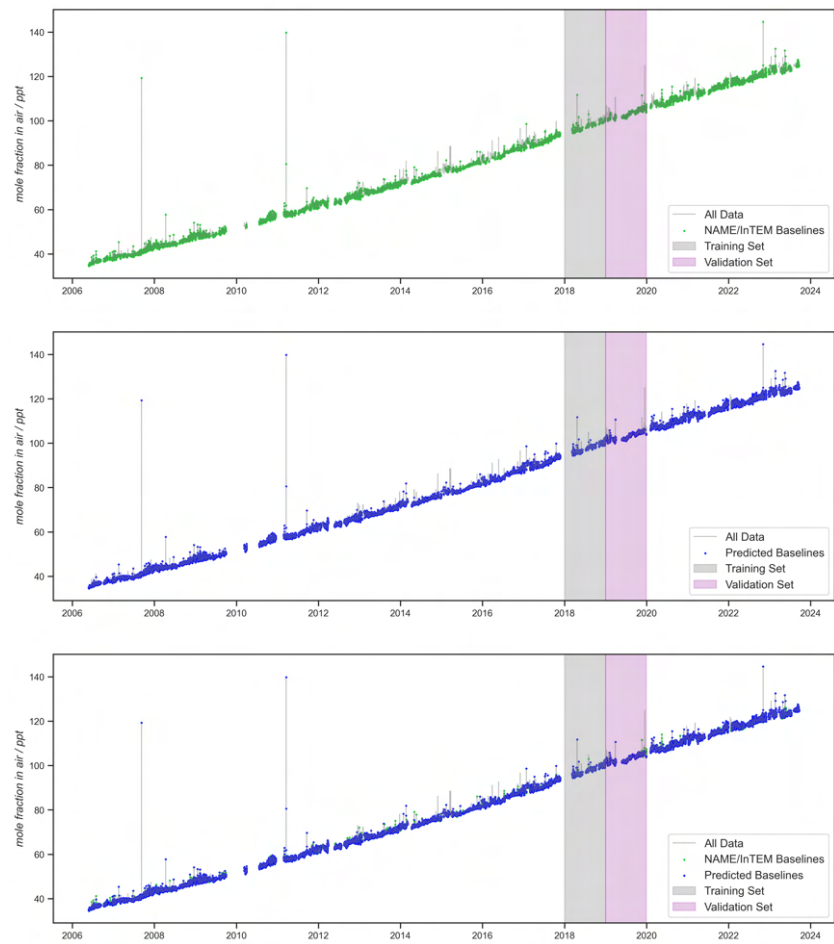

Monthly means

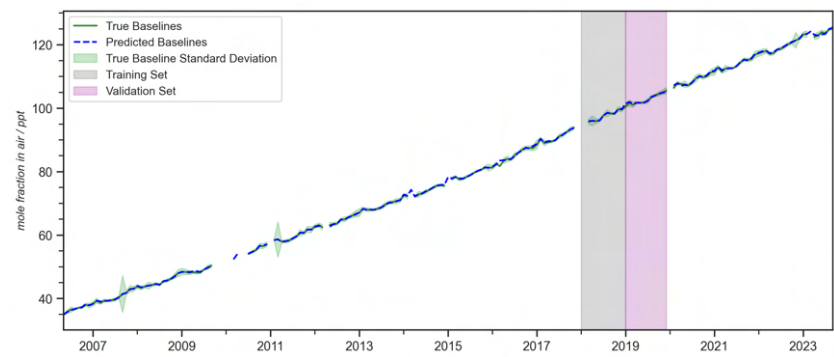

4.10.9 N<sub>2</sub>O

Mole fraction time series

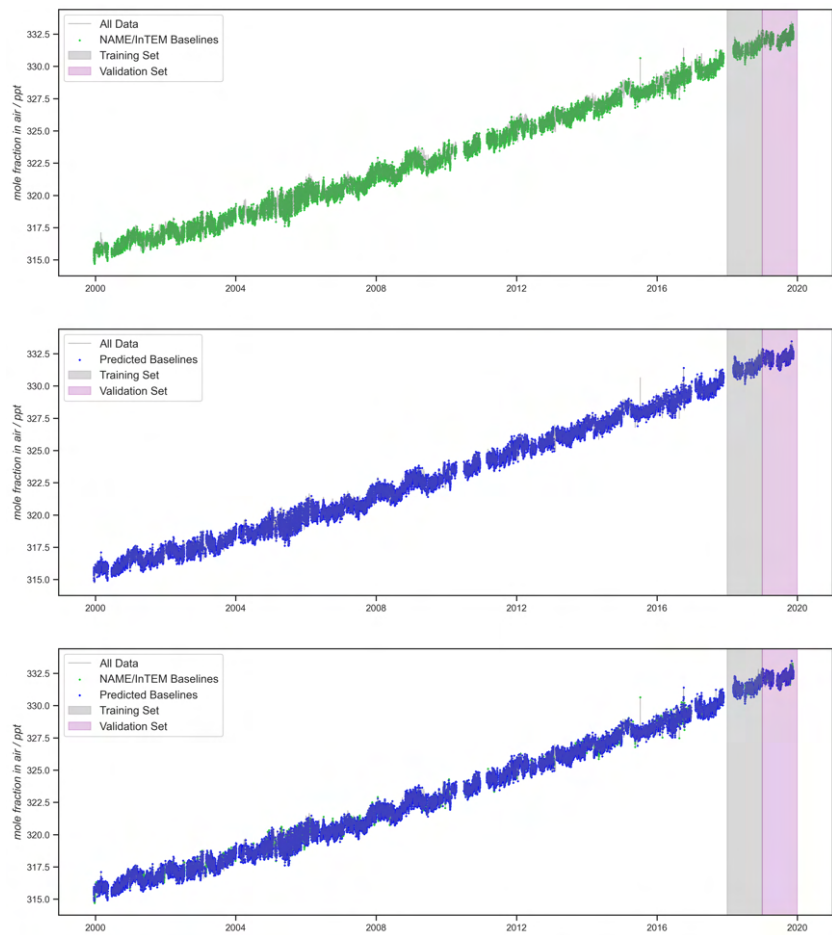

205 Monthly means

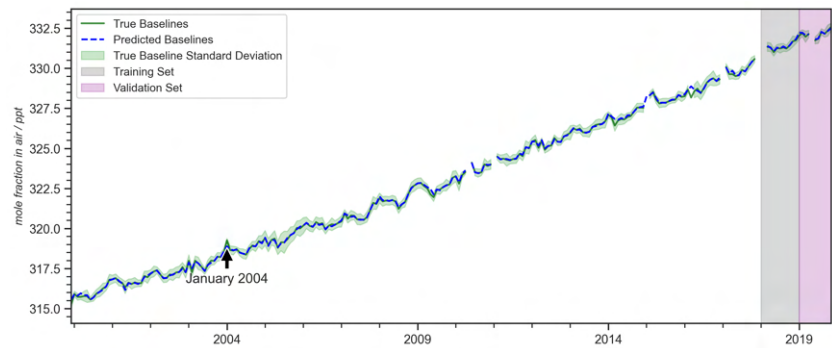

4.10.10 SF<sub>6</sub>

Mole fraction time series

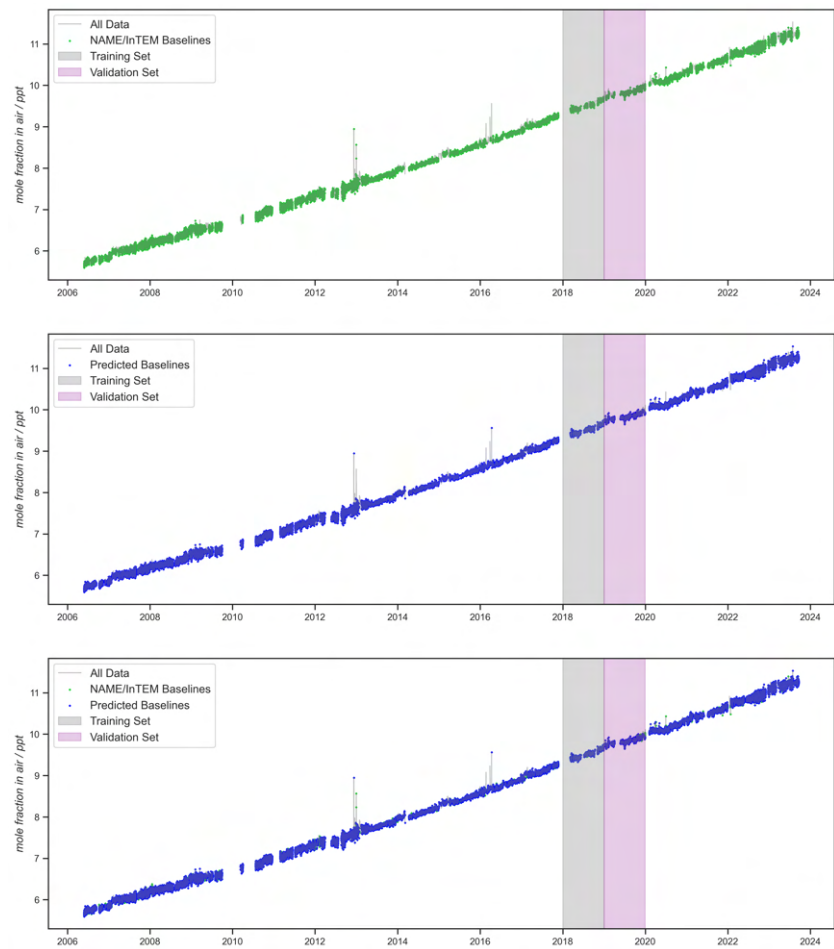

Monthly means

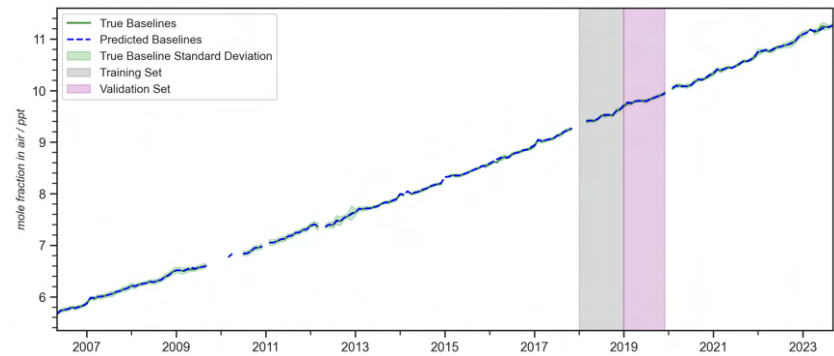

4.11 Trinidad Head, USA

210 4.11.1 CH<sub>4</sub>

Mole fraction time series

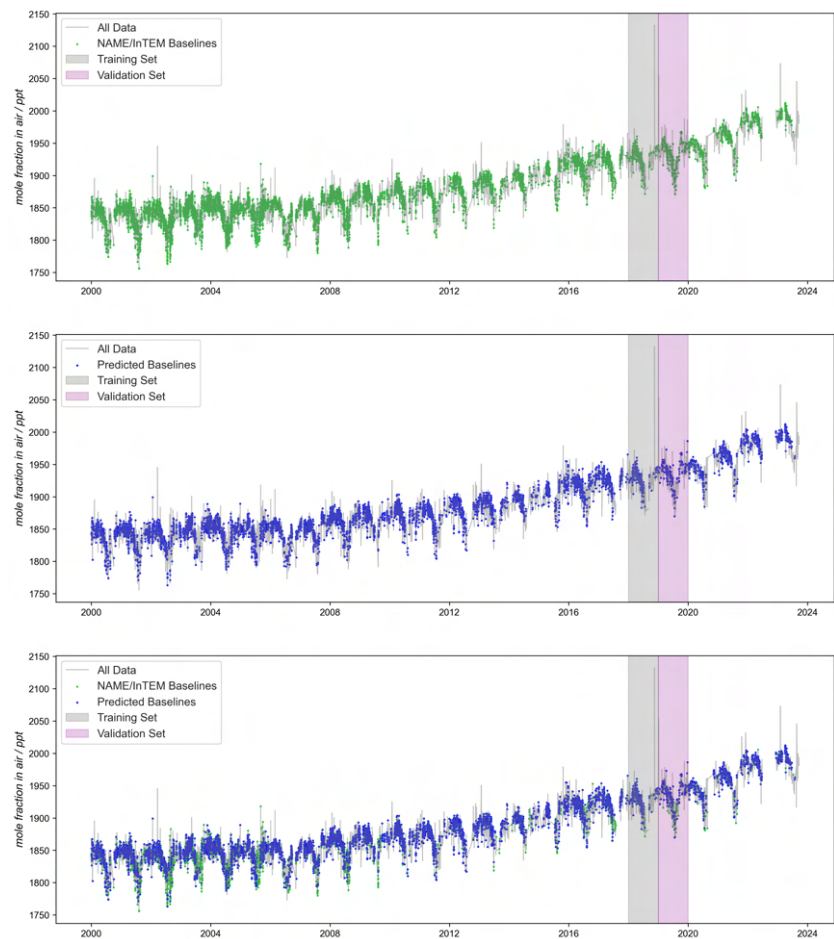



Monthly means

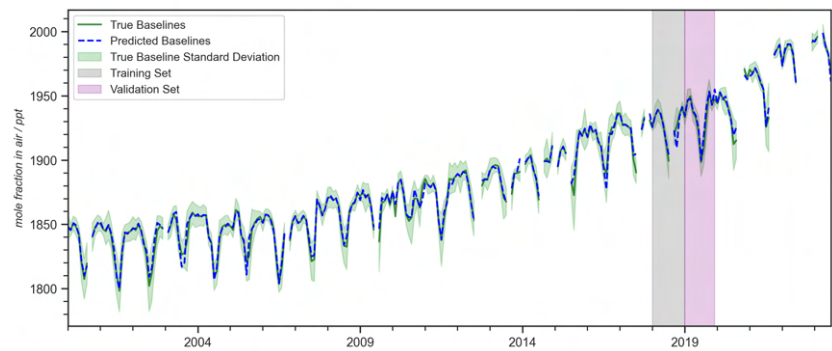

4.11.2 CF<sub>4</sub>

Mole fraction time series

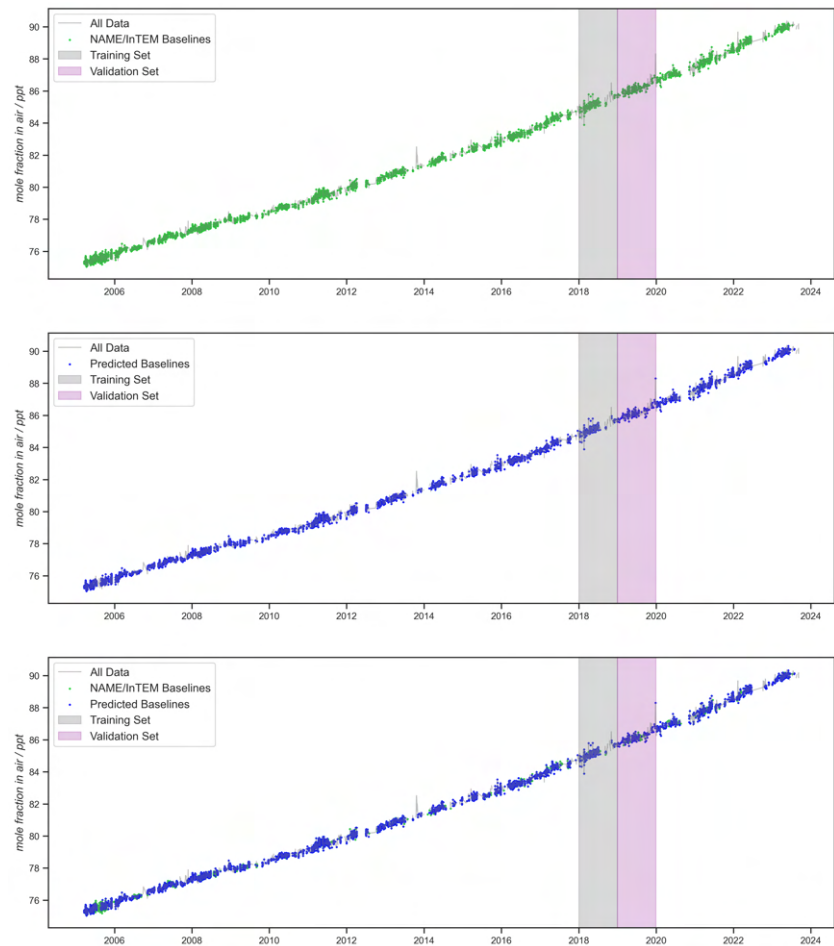

215 Monthly means

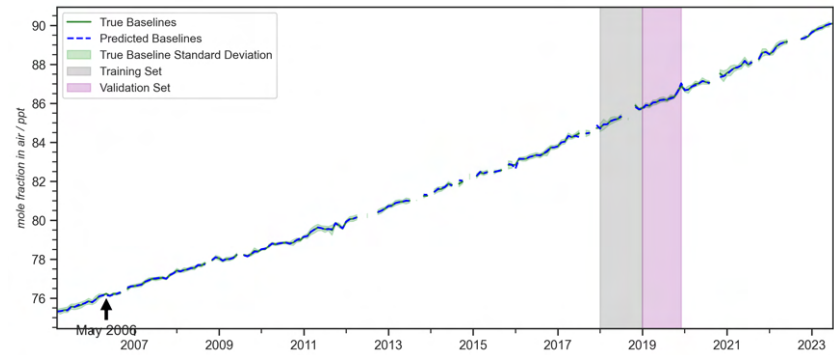

4.11.3 CFC-12

Mole fraction time series

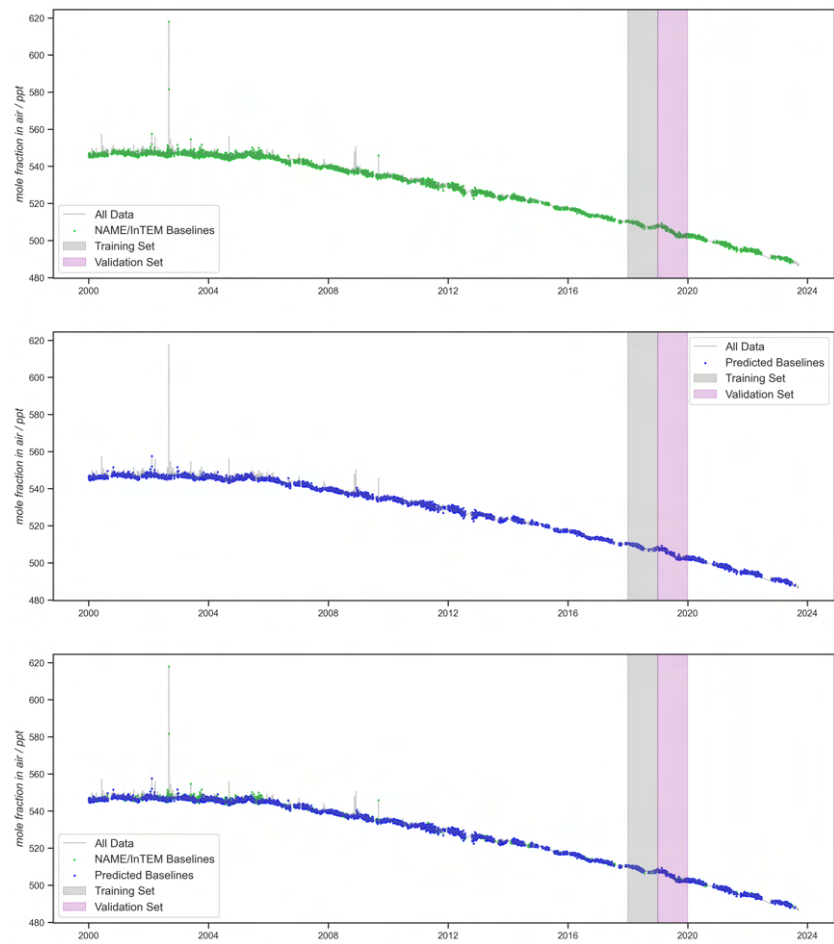

Monthly means

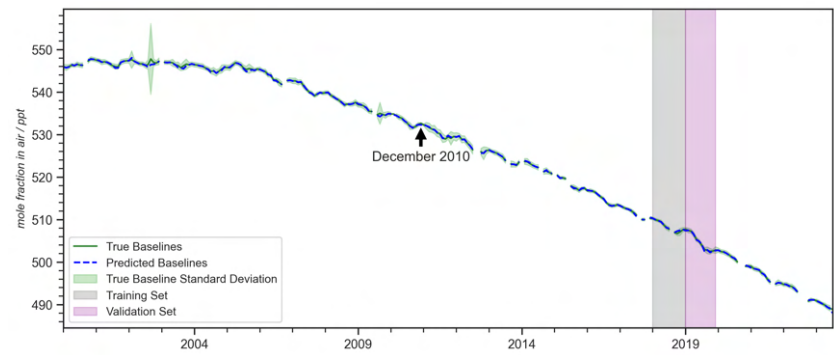

#### 4.11.4 CH<sub>2</sub>Cl<sub>2</sub>

#### 220 Mole fraction time series

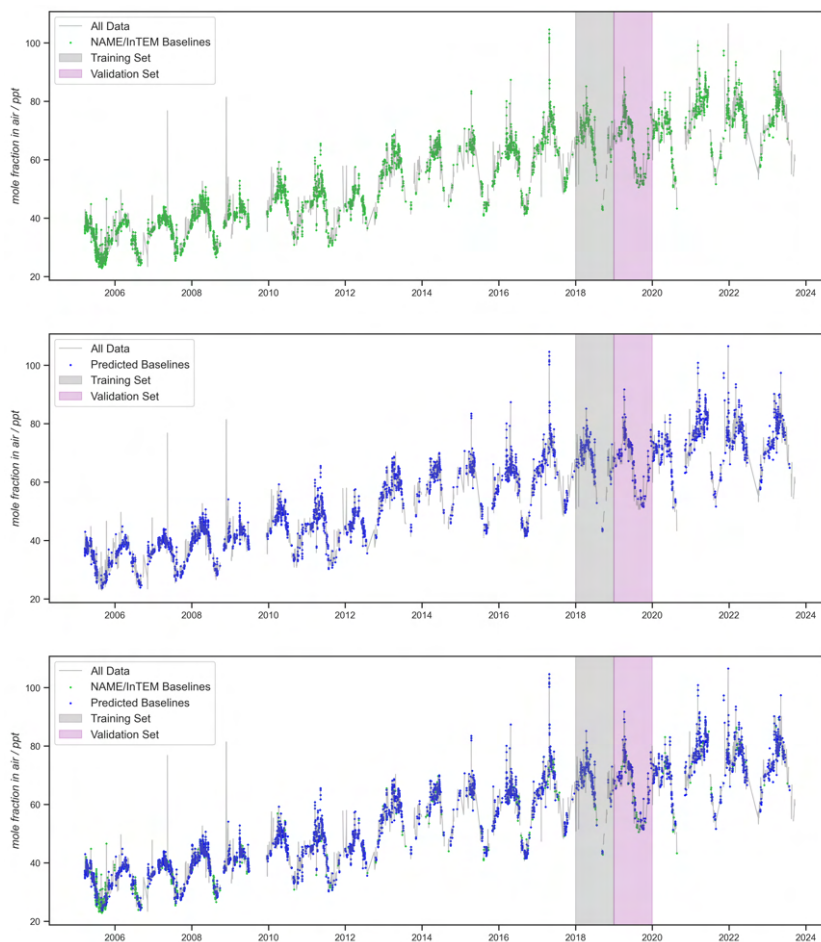

#### Monthly means

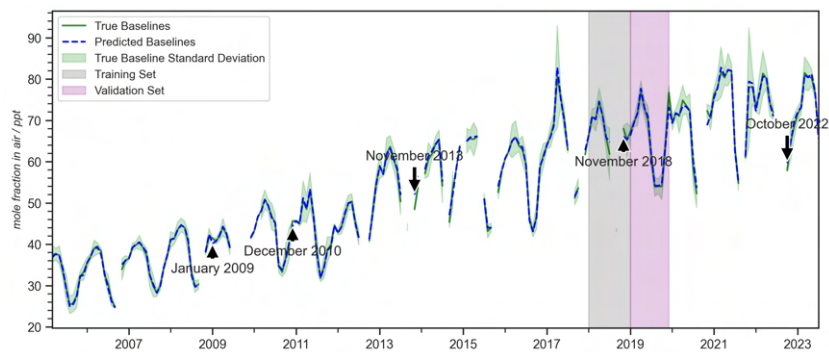

### 4.11.5 CH<sub>3</sub>Br

#### Mole fraction time series

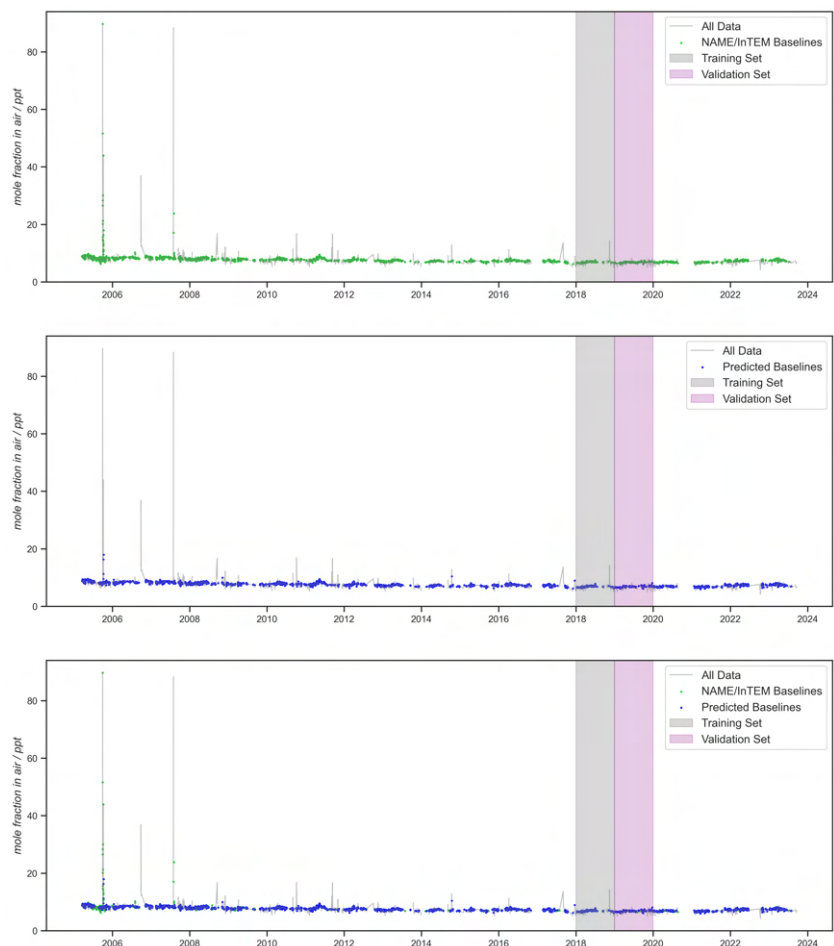

#### Monthly means

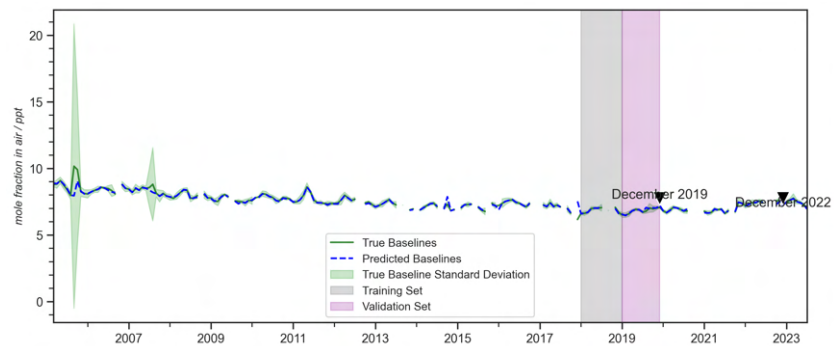

Mole fraction time series

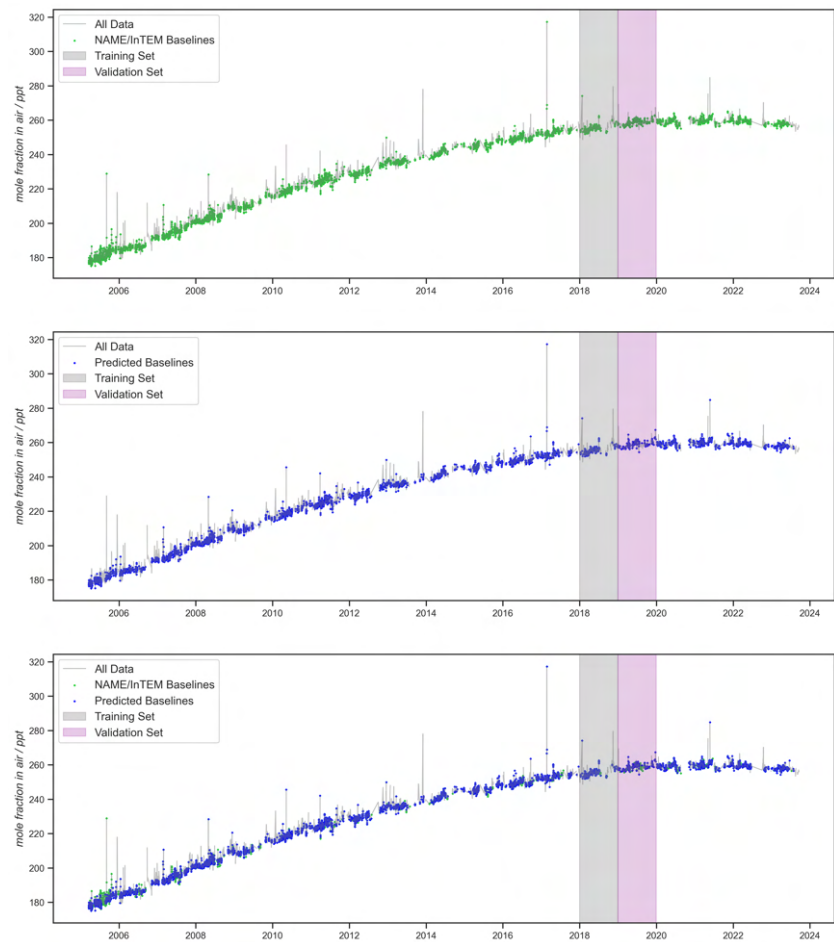

Monthly means

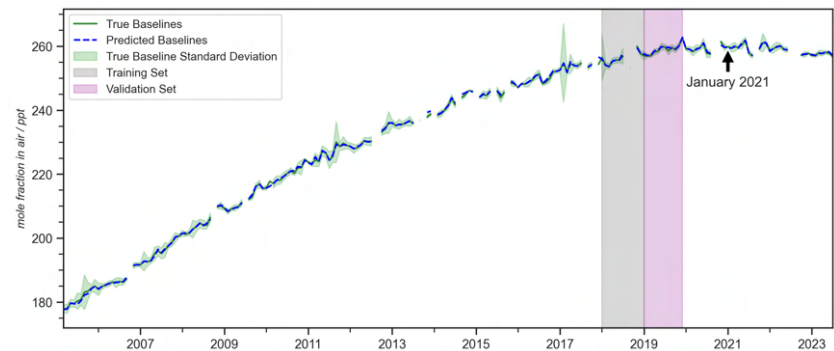

4.11.7 HFC-125

Mole fraction time series

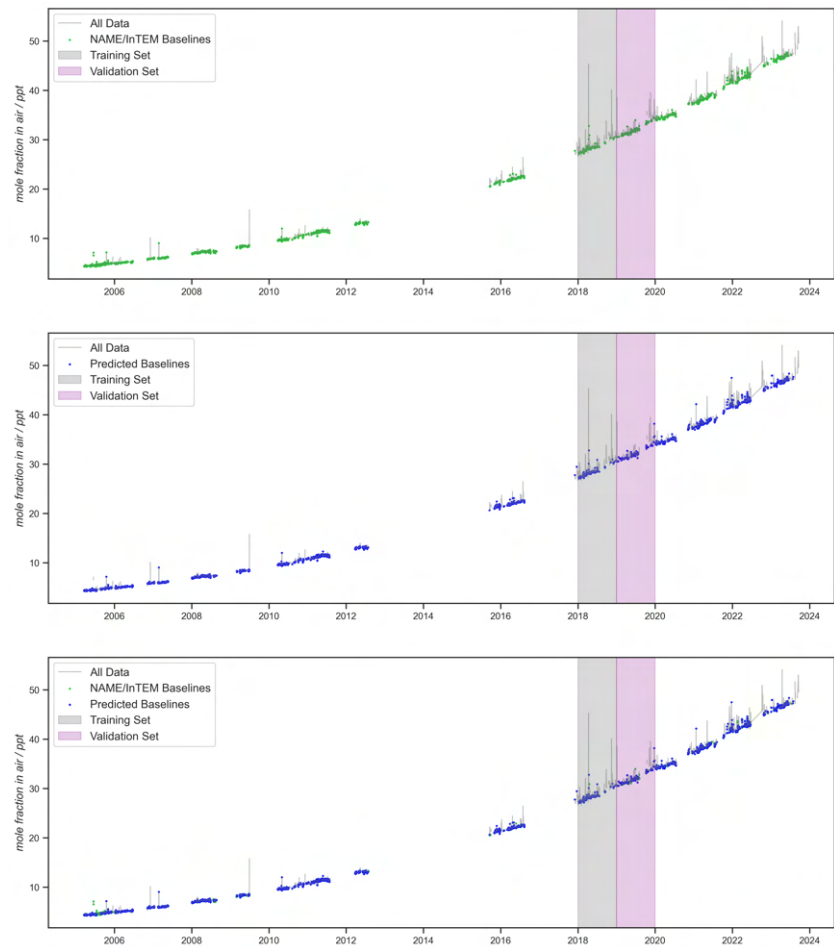

230 Monthly means

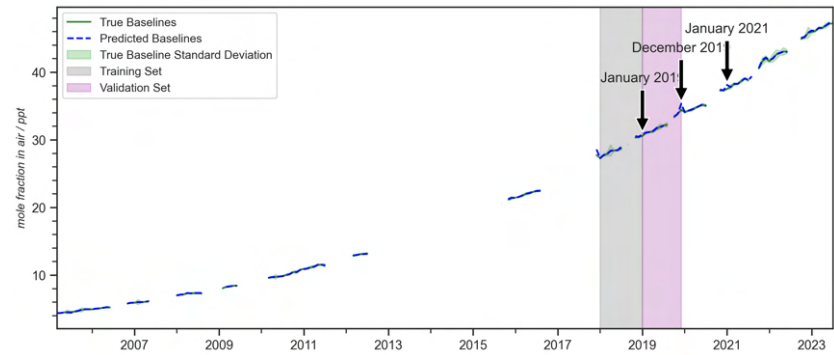

4.11.8 HFC-134a

Mole fraction time series

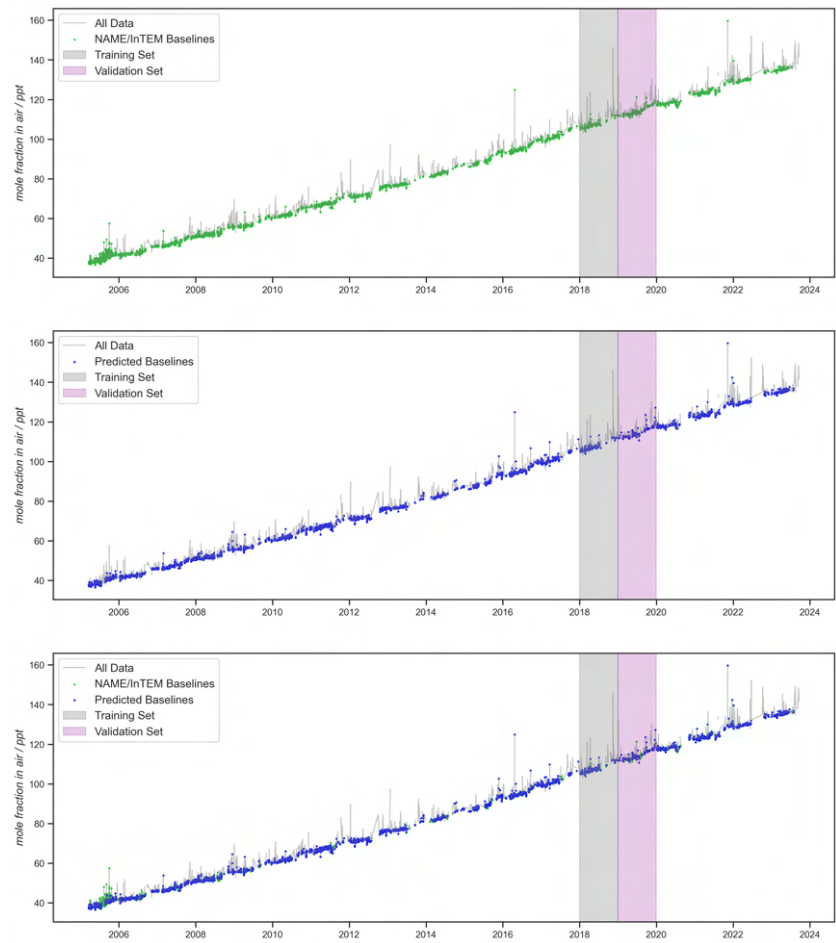

Monthly means

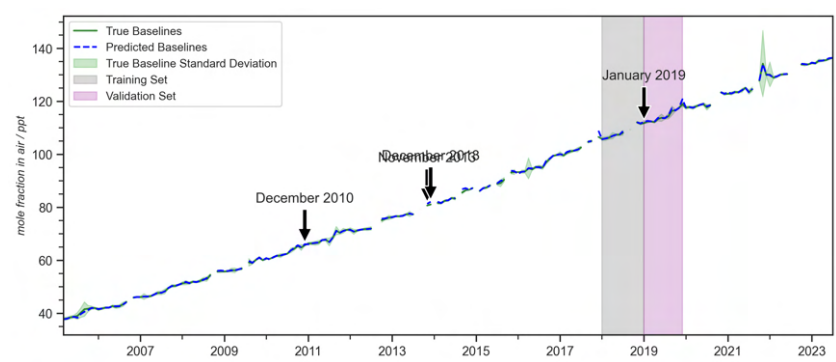



4.11.9 N<sub>2</sub>O

235 Mole fraction time series

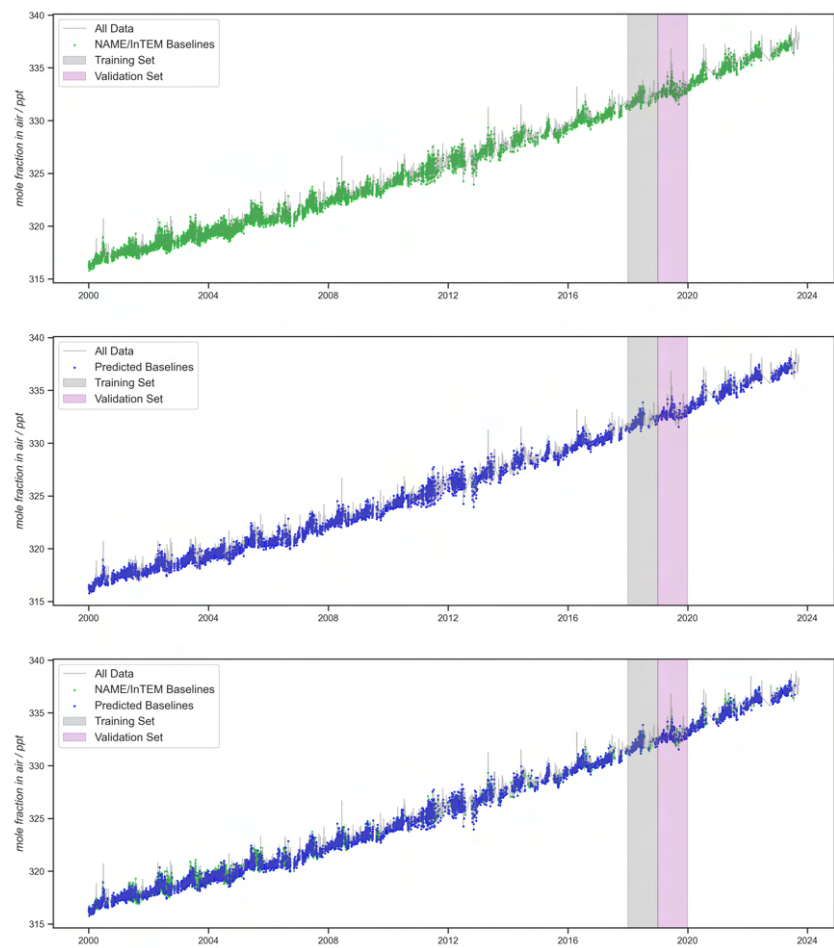

Monthly means

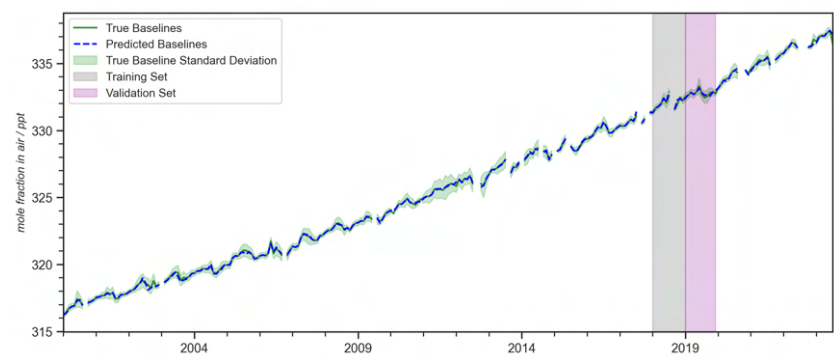

4.11.10 SF<sub>6</sub>

Mole fraction time series

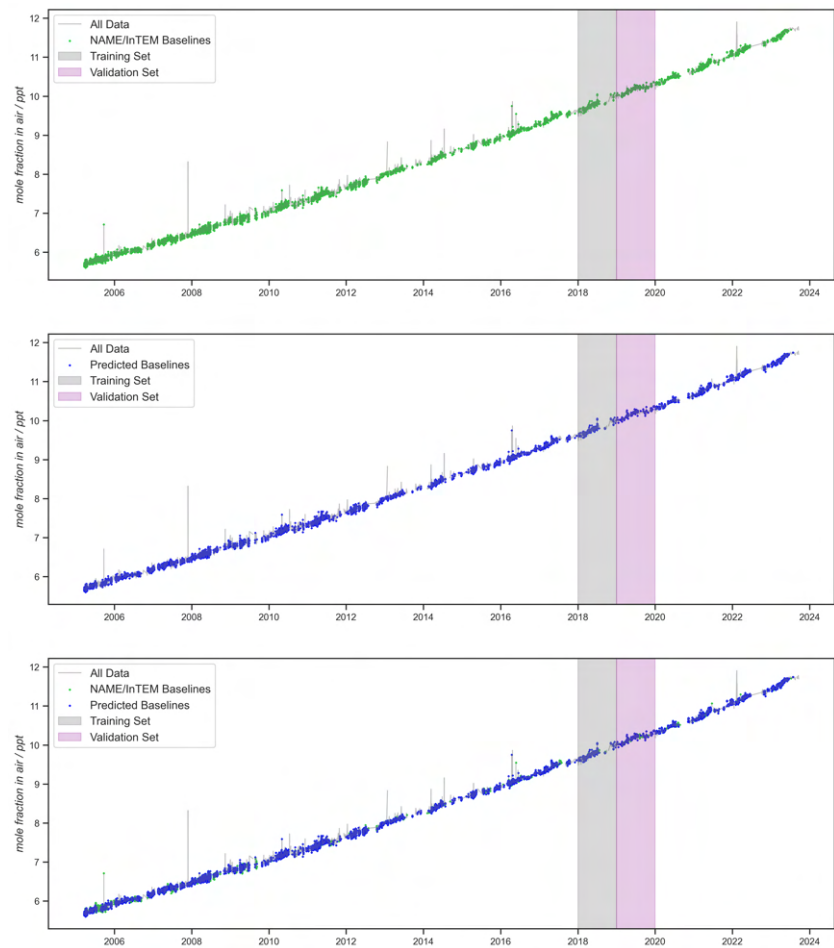

Monthly means

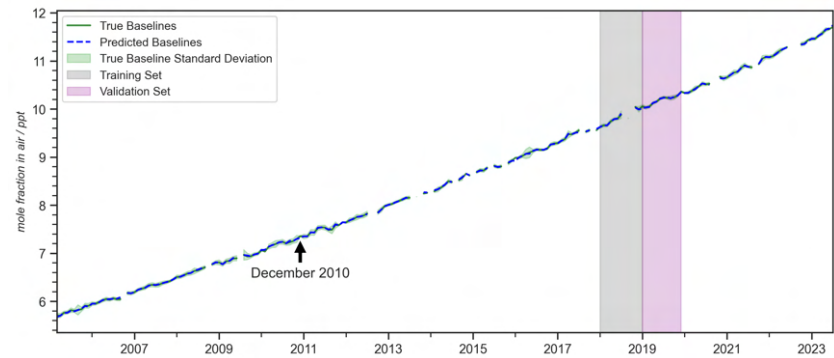

4.12.1 CF<sub>4</sub>

Mole fraction time series

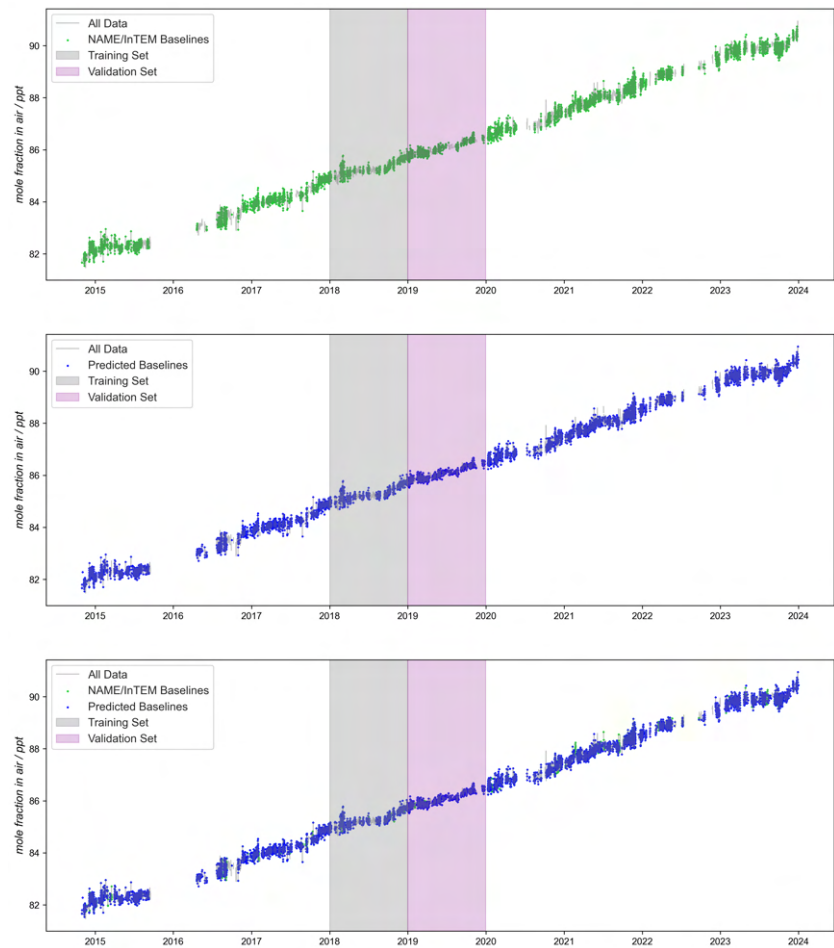

Monthly means

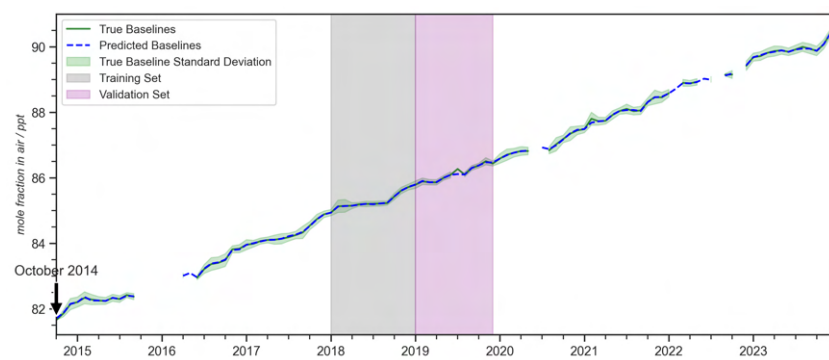

4.12.2 CFC-12

245 Mole fraction time series

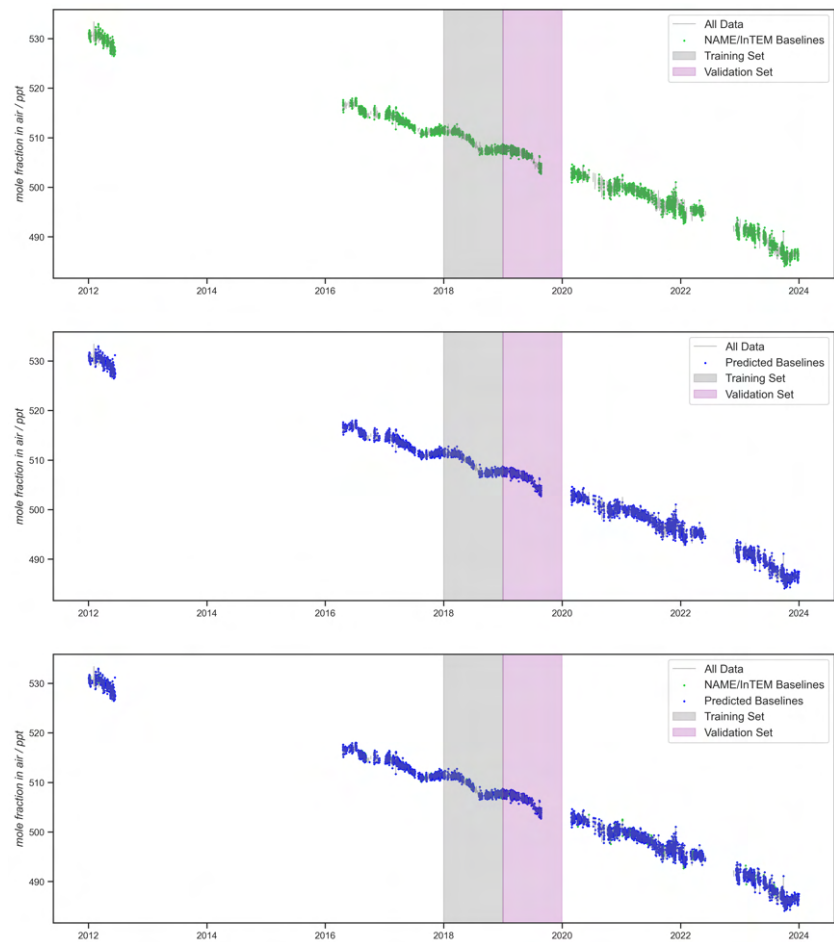

Monthly means

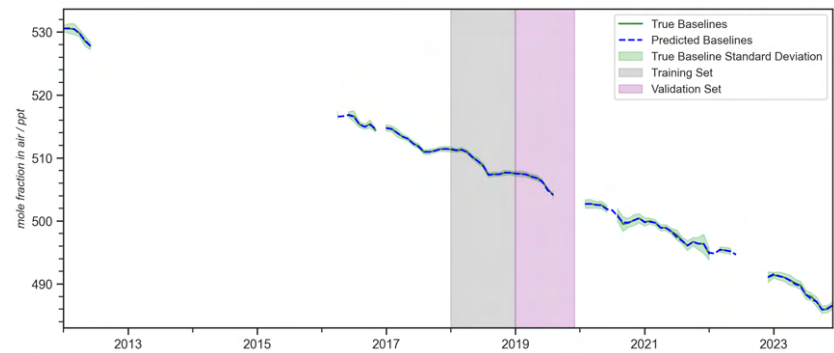

### 4.12.3 CH<sub>2</sub>Cl<sub>2</sub>

#### Mole fraction time series

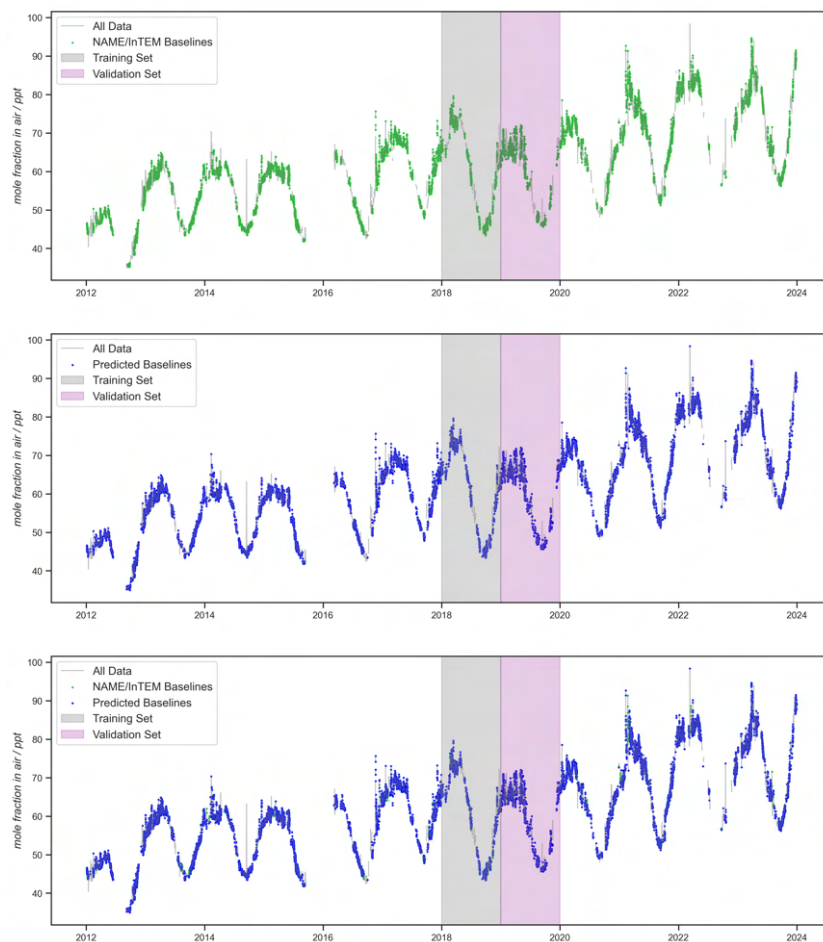

#### Monthly means

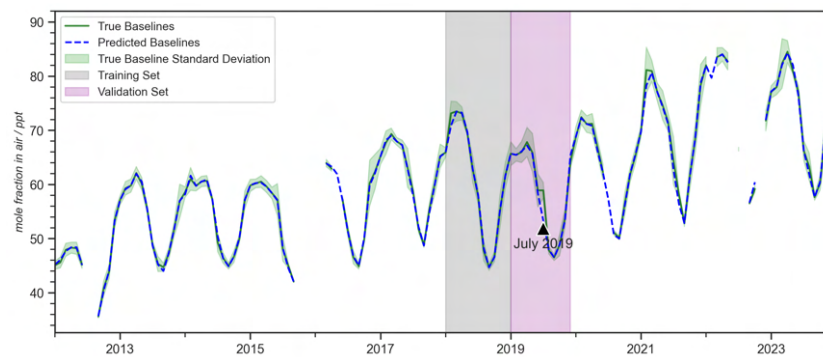

Mole fraction time series

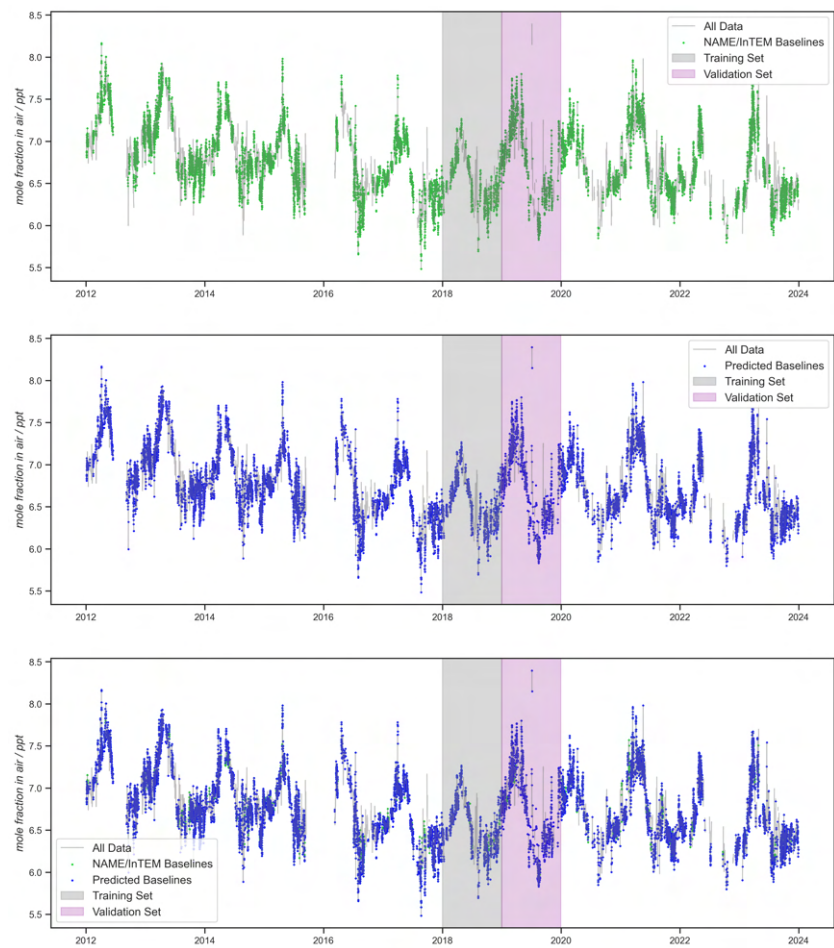

Monthly means

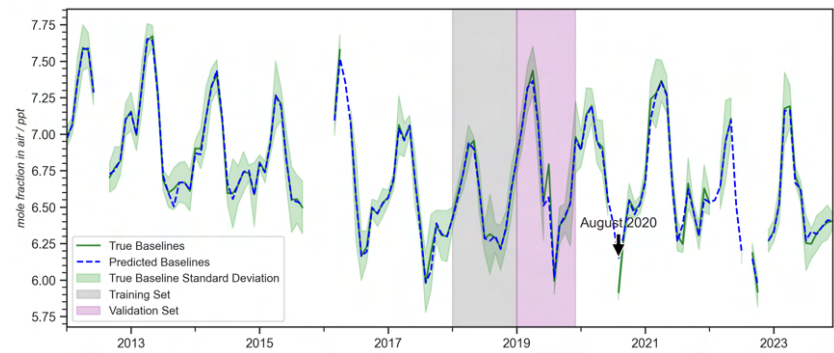

4.12.5 HCFC-22

Mole fraction time series

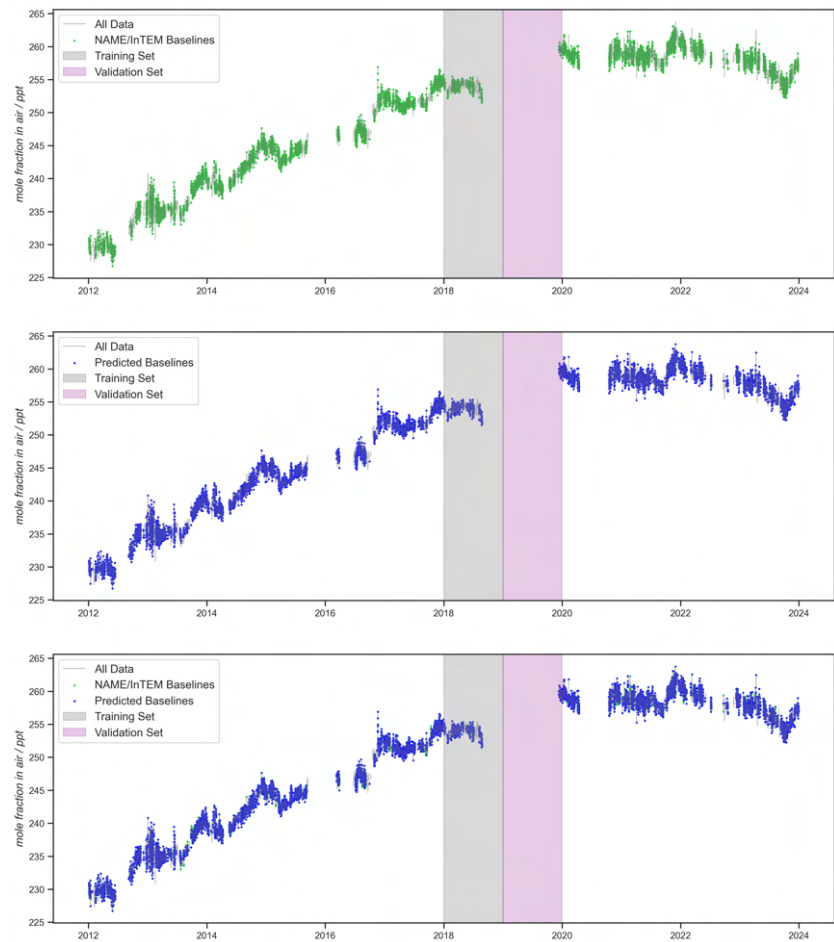

255 Monthly means

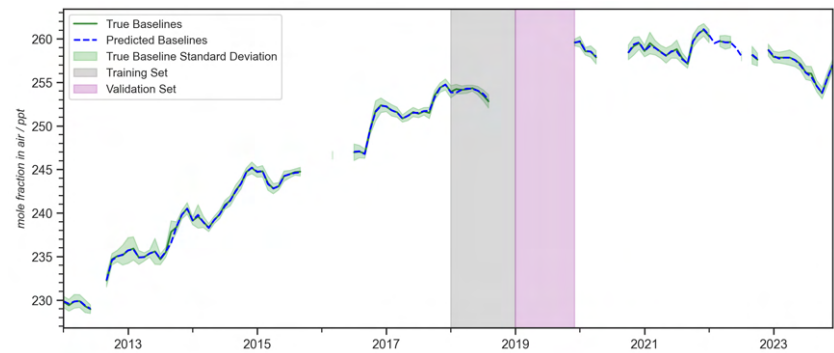



4.12.6 HFC-125

Mole fraction time series

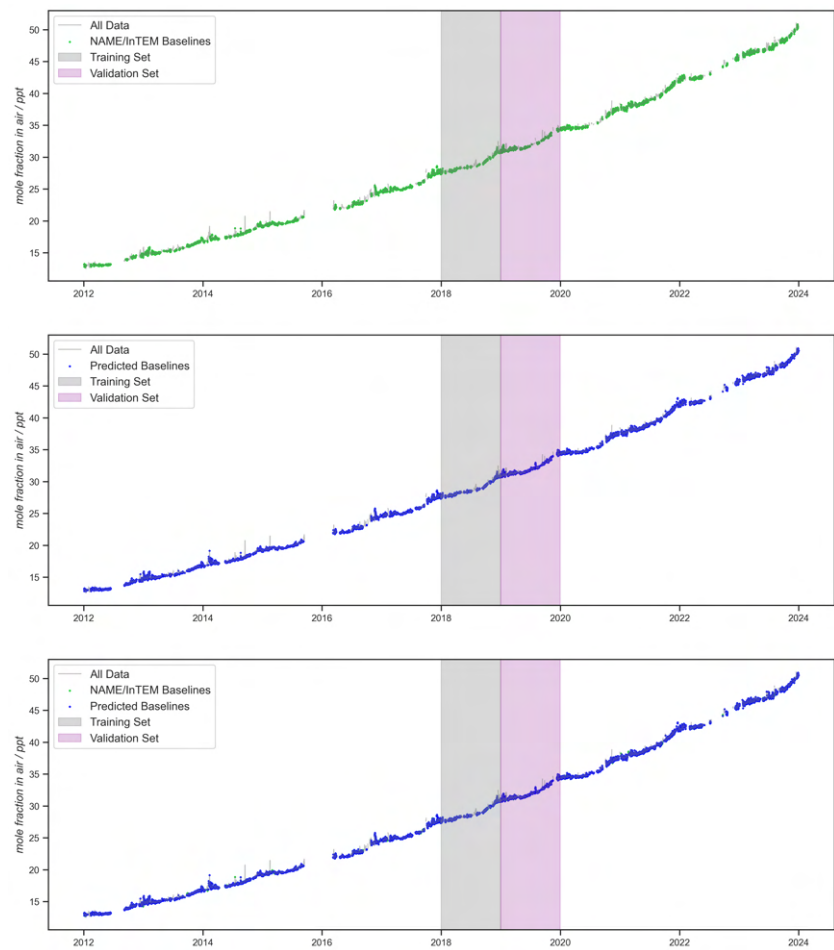

Monthly means

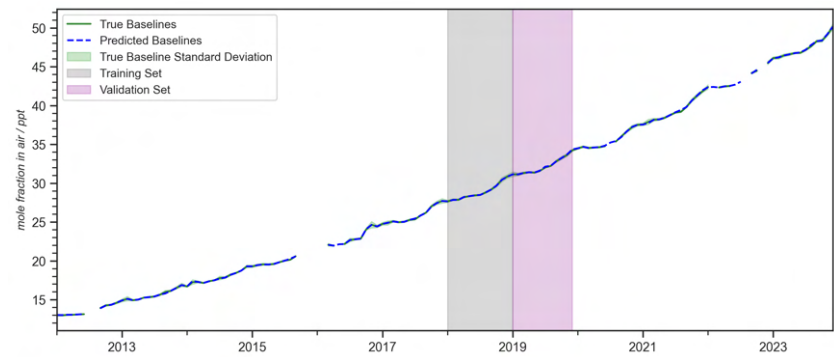

4.12.7 HFC-134a

260 Mole fraction time series

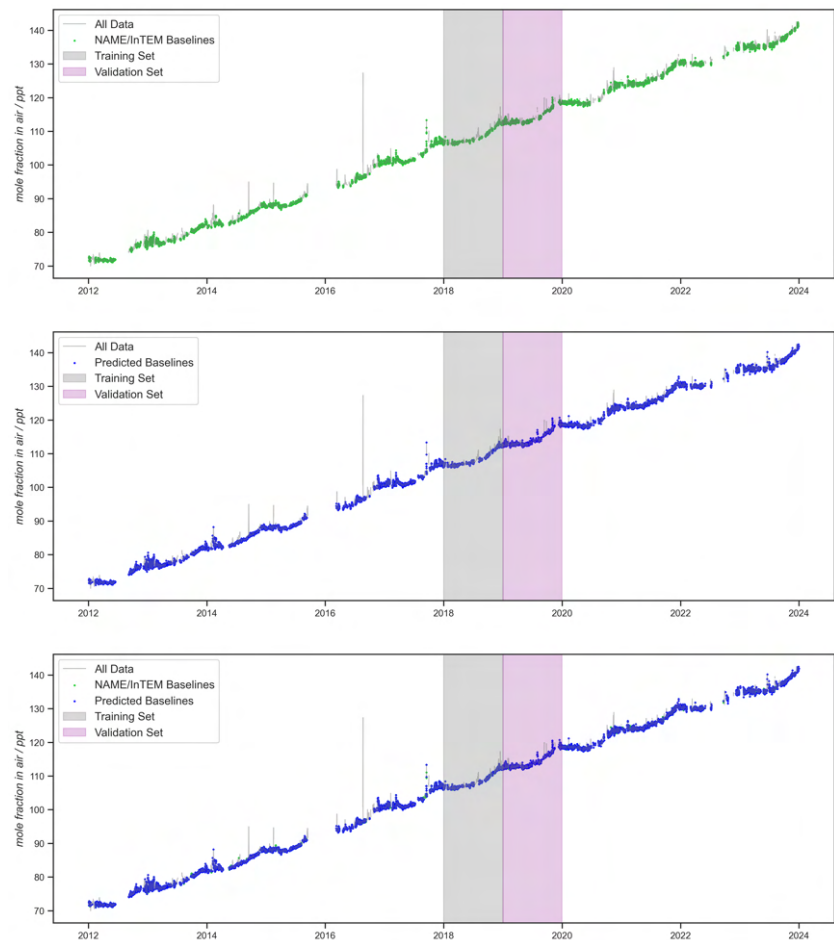

Monthly means

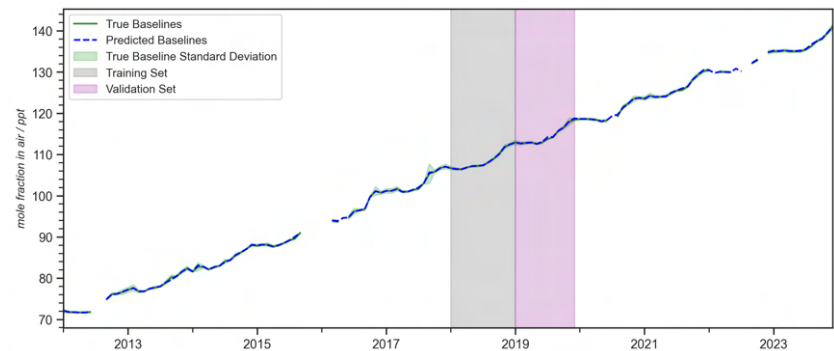

## 4.12.8 SF<sub>6</sub>

### Mole fraction time series

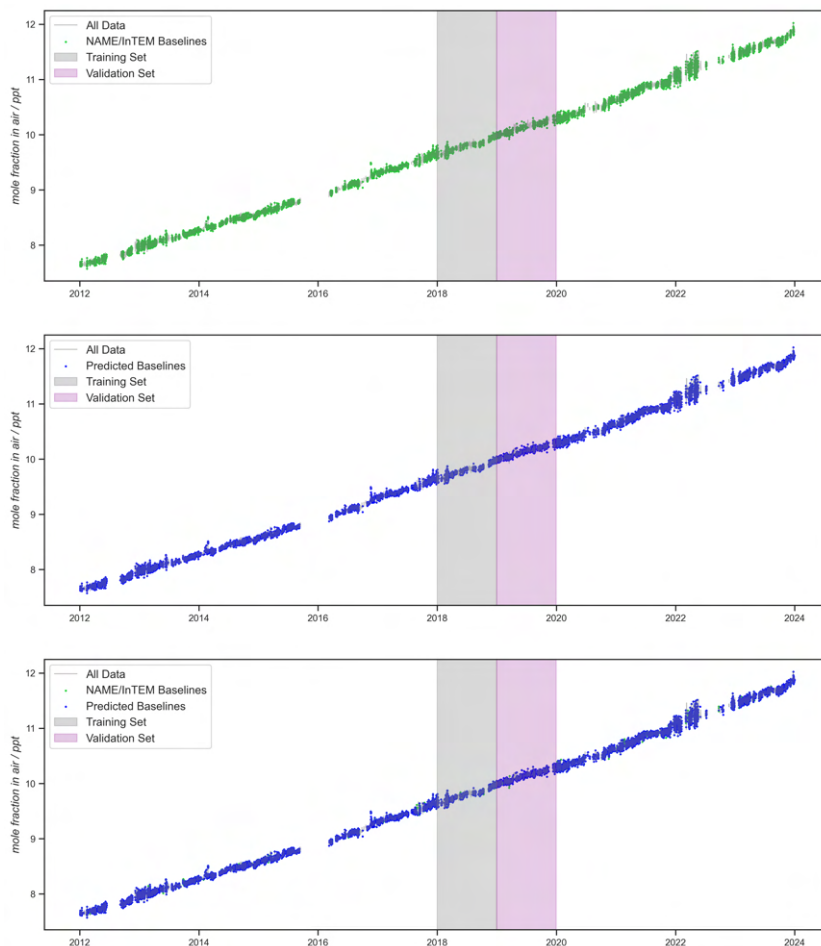

### Monthly means

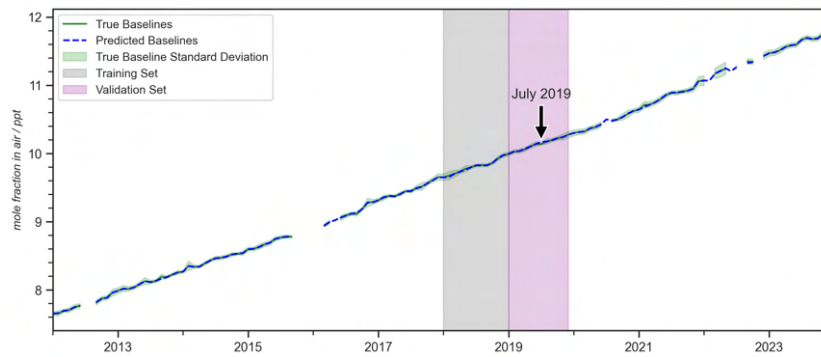

Supplement: Supplementary file 1 [file egusphere-2025-4137-supplement.pdf]
